# Supplementary material for: Transposon-associated small RNAs involved in plant defense in poplar
Source: Research Square preprint supplement (doi:10.21203/rs.3.rs-154563/v1), 2021-02-11
Supplement: Supplementary file 1 [file 48a9e0c28e76dbef28da9b2c.xlsx]

## Sheet: Sheet1
Data S10. The miRNA/target pairs having degradome evidence.
#SmallRNA	Target	AlignmentScore	Alignment Range	CleavageSite	Category	P value	Duplicate
ptc-miR1444a	Potri.001G388900	2.5	1091-1110	1101	0	0.00789279	1
ptc-miR1444b	Potri.001G388900	4.5	1091-1110	1101	0	0.0350302	1
ptc-miR1444c	Potri.001G388900	4.5	1091-1110	1101	0	0.0350302	1
ptc-miR1450	Potri.002G258400	5.5	3392-3413	3404	1	0.0316193	0
ptc-miR1450	Potri.009G074700	7	762-783	774	1	0.0348332	0
ptc-miR1450	Potri.005G196300	4.5	708-729	720	1	0.0135684	0
ptc-miR1450	Potri.012G080100	6	2228-2249	2240	0	0.0420787	0
ptc-miR1450	Potri.006G204800	7	983-1005	995	1	0.0371182	0
ptc-miR156a	Potri.012G100700	2	1077-1096	1087	0	0.0258106	1
ptc-miR156a	Potri.001G398200	2	646-665	656	0	0.0258106	1
ptc-miR156a	Potri.007G138800	2	927-946	937	0	0.0258106	1
ptc-miR156a	Potri.011G116800	2	699-718	709	0	0.0258106	1
ptc-miR156b	Potri.012G100700	2	1077-1096	1087	0	0.0258106	1
ptc-miR156b	Potri.001G398200	2	646-665	656	0	0.0258106	1
ptc-miR156b	Potri.007G138800	2	927-946	937	0	0.0258106	1
ptc-miR156b	Potri.011G116800	2	699-718	709	0	0.0258106	1
ptc-miR156c	Potri.012G100700	2	1077-1096	1087	0	0.0258106	1
ptc-miR156c	Potri.001G398200	2	646-665	656	0	0.0258106	1
ptc-miR156c	Potri.007G138800	2	927-946	937	0	0.0258106	1
ptc-miR156c	Potri.011G116800	2	699-718	709	0	0.0258106	1
ptc-miR156d	Potri.012G100700	2	1077-1096	1087	0	0.0258106	1
ptc-miR156d	Potri.001G398200	2	646-665	656	0	0.0258106	1
ptc-miR156d	Potri.007G138800	2	927-946	937	0	0.0258106	1
ptc-miR156d	Potri.011G116800	2	699-718	709	0	0.0258106	1
ptc-miR156e	Potri.012G100700	2	1077-1096	1087	0	0.0258106	1
ptc-miR156e	Potri.001G398200	2	646-665	656	0	0.0258106	1
ptc-miR156e	Potri.007G138800	2	927-946	937	0	0.0258106	1
ptc-miR156e	Potri.011G116800	2	699-718	709	0	0.0258106	1
ptc-miR156f	Potri.012G100700	2	1077-1096	1087	0	0.0258106	1
ptc-miR156f	Potri.001G398200	2	646-665	656	0	0.0258106	1
ptc-miR156f	Potri.007G138800	2	927-946	937	0	0.0258106	1
ptc-miR156f	Potri.011G116800	2	699-718	709	0	0.0258106	1
ptc-miR156g	Potri.012G100700	4	1077-1097	1088	0	0.0373333	1
ptc-miR156g	Potri.008G097900	2.5	1237-1257	1248	1	0.00747837	1
ptc-miR156g	Potri.001G058600	3	1389-1409	1400	0	0.0256129	1
ptc-miR156g	Potri.010G154300	2.5	1175-1195	1186	0	0.00638609	1
ptc-miR156g	Potri.001G398200	4	646-666	657	1	0.0363775	1
ptc-miR156g	Potri.014G057800	3	1072-1092	1083	1	0.0324456	1
ptc-miR156g	Potri.003G169400	3	1401-1421	1412	0	0.0234098	1
ptc-miR156g	Potri.002G142400	3	1024-1044	1035	0	0.0234098	1
ptc-miR156g	Potri.004G046700	3	618-638	629	0	0.0234098	1
ptc-miR156h	Potri.012G100700	4	1077-1097	1088	0	0.0373333	1
ptc-miR156h	Potri.008G097900	2.5	1237-1257	1248	1	0.00747837	1
ptc-miR156h	Potri.001G058600	3	1389-1409	1400	0	0.0256129	1
ptc-miR156h	Potri.010G154300	2.5	1175-1195	1186	0	0.00638609	1
ptc-miR156h	Potri.001G398200	4	646-666	657	1	0.0363775	1
ptc-miR156h	Potri.014G057800	3	1072-1092	1083	1	0.0324456	1
ptc-miR156h	Potri.003G169400	3	1401-1421	1412	0	0.0234098	1
ptc-miR156h	Potri.002G142400	3	1024-1044	1035	0	0.0234098	1
ptc-miR156h	Potri.004G046700	3	618-638	629	0	0.0234098	1
ptc-miR156i	Potri.012G100700	4	1077-1097	1088	0	0.0373333	1
ptc-miR156i	Potri.008G097900	2.5	1237-1257	1248	1	0.00747837	1
ptc-miR156i	Potri.001G058600	3	1389-1409	1400	0	0.0256129	1
ptc-miR156i	Potri.010G154300	2.5	1175-1195	1186	0	0.00638609	1
ptc-miR156i	Potri.001G398200	4	646-666	657	1	0.0363775	1
ptc-miR156i	Potri.014G057800	3	1072-1092	1083	1	0.0324456	1
ptc-miR156i	Potri.003G169400	3	1401-1421	1412	0	0.0234098	1
ptc-miR156i	Potri.002G142400	3	1024-1044	1035	0	0.0234098	1
ptc-miR156i	Potri.004G046700	3	618-638	629	0	0.0234098	1
ptc-miR156j	Potri.012G100700	4	1077-1097	1088	0	0.0373333	1
ptc-miR156j	Potri.008G097900	2.5	1237-1257	1248	1	0.00747837	1
ptc-miR156j	Potri.001G058600	3	1389-1409	1400	0	0.0256129	1
ptc-miR156j	Potri.010G154300	2.5	1175-1195	1186	0	0.00638609	1
ptc-miR156j	Potri.001G398200	4	646-666	657	1	0.0363775	1
ptc-miR156j	Potri.014G057800	3	1072-1092	1083	1	0.0324456	1
ptc-miR156j	Potri.003G169400	3	1401-1421	1412	0	0.0234098	1
ptc-miR156j	Potri.002G142400	3	1024-1044	1035	0	0.0234098	1
ptc-miR156j	Potri.004G046700	3	618-638	629	0	0.0234098	1
ptc-miR156k	Potri.012G100700	1.5	1077-1096	1087	0	0.0188382	1
ptc-miR156k	Potri.001G398200	1	646-665	656	0	0.0153332	1
ptc-miR156k	Potri.007G138800	1.5	927-946	937	0	0.0188382	1
ptc-miR156k	Potri.011G116800	1	699-718	709	0	0.0153332	1
ptc-miR156k	Potri.010G195700	7	393-412	403	3	0.0486317	0
ptc-miR156l	Potri.008G097900	3.5	1237-1257	1248	1	0.0119385	1
ptc-miR156l	Potri.010G154300	3.5	1175-1195	1186	0	0.0101982	1
ptc-miR159a	Potri.001G224500	3	1076-1096	1087	1	0.0101507	1
ptc-miR159a	Potri.009G018700	3	1049-1069	1060	0	0.00917076	1
ptc-miR159a	Potri.001G036000	3.5	1256-1276	1267	0	0.0133124	1
ptc-miR159b	Potri.001G224500	3	1076-1096	1087	1	0.0101507	1
ptc-miR159b	Potri.009G018700	3	1049-1069	1060	0	0.00917076	1
ptc-miR159b	Potri.001G036000	3.5	1256-1276	1267	0	0.0133124	1
ptc-miR159c	Potri.003G189700	0.5	1259-1279	1270	0	0.0110324	1
ptc-miR159c	Potri.001G224500	1	1076-1096	1087	1	0.0194576	1
ptc-miR159c	Potri.009G018700	1	1049-1069	1060	0	0.0175872	1
ptc-miR159c	Potri.001G036000	1	1256-1276	1267	0	0.00867331	1
ptc-miR159d	Potri.005G149800	3	1454-1474	1465	0	0.0106405	0
ptc-miR159d	Potri.009G018700	5	1049-1069	1060	0	0.0442233	1
ptc-miR159d	Potri.001G036000	4	1256-1276	1267	0	0.0185876	1
ptc-miR160a	Potri.006G127500	0.5	2256-2276	2267	0	0.0219432	1
ptc-miR160a	Potri.009G014800	1	1407-1427	1418	0	0.0203919	1
ptc-miR160a	Potri.005G171300	0.5	1468-1488	1479	1	0.0211922	1
ptc-miR160a	Potri.002G089900	0.5	1311-1331	1322	0	0.0177785	1
ptc-miR160a	Potri.004G211700	1	1718-1738	1729	0	0.0157262	1
ptc-miR160b-5p	Potri.006G127500	0.5	2256-2276	2267	0	0.0219432	1
ptc-miR160b-5p	Potri.009G014800	1	1407-1427	1418	0	0.0203919	1
ptc-miR160b-5p	Potri.005G171300	0.5	1468-1488	1479	1	0.0211922	1
ptc-miR160b-5p	Potri.002G089900	0.5	1311-1331	1322	0	0.0177785	1
ptc-miR160b-5p	Potri.004G211700	1	1718-1738	1729	0	0.0157262	1
ptc-miR160c-5p	Potri.006G127500	0.5	2256-2276	2267	0	0.0219432	1
ptc-miR160c-5p	Potri.009G014800	1	1407-1427	1418	0	0.0203919	1
ptc-miR160c-5p	Potri.005G171300	0.5	1468-1488	1479	1	0.0211922	1
ptc-miR160c-5p	Potri.002G089900	0.5	1311-1331	1322	0	0.0177785	1
ptc-miR160c-5p	Potri.004G211700	1	1718-1738	1729	0	0.0157262	1
ptc-miR160d	Potri.006G127500	0.5	2256-2276	2267	0	0.0219432	1
ptc-miR160d	Potri.009G014800	1	1407-1427	1418	0	0.0203919	1
ptc-miR160d	Potri.005G171300	0.5	1468-1488	1479	1	0.0211922	1
ptc-miR160d	Potri.002G089900	0.5	1311-1331	1322	0	0.0177785	1
ptc-miR160d	Potri.004G211700	1	1718-1738	1729	0	0.0157262	1
ptc-miR160e-5p	Potri.006G127500	1	2256-2276	2267	0	0.0203919	1
ptc-miR160e-5p	Potri.009G014800	2	1407-1427	1418	0	0.017282	1
ptc-miR160e-5p	Potri.005G171300	1	1468-1488	1479	1	0.0196935	1
ptc-miR160e-5p	Potri.002G089900	1	1311-1331	1322	0	0.0165191	1
ptc-miR160e-5p	Potri.004G211700	2	1718-1738	1729	0	0.013323	1
ptc-miR160f	Potri.006G127500	1	2256-2276	2267	0	0.0203919	1
ptc-miR160f	Potri.009G014800	2	1407-1427	1418	0	0.017282	1
ptc-miR160f	Potri.005G171300	1	1468-1488	1479	1	0.0196935	1
ptc-miR160f	Potri.002G089900	1	1311-1331	1322	0	0.0165191	1
ptc-miR160f	Potri.004G211700	2	1718-1738	1729	0	0.013323	1
ptc-miR160g	Potri.006G127500	1	2256-2276	2267	0	0.0203919	1
ptc-miR160g	Potri.009G014800	2	1407-1427	1418	0	0.017282	1
ptc-miR160g	Potri.005G171300	1	1468-1488	1479	1	0.0196935	1
ptc-miR160g	Potri.002G089900	1	1311-1331	1322	0	0.0165191	1
ptc-miR160g	Potri.004G211700	2	1718-1738	1729	0	0.013323	1
ptc-miR160h	Potri.006G127500	0	2256-2276	2267	0	0.023492	1
ptc-miR160h	Potri.009G014800	2	1407-1427	1418	0	0.017282	1
ptc-miR160h	Potri.005G171300	0	1468-1488	1479	1	0.0226886	1
ptc-miR160h	Potri.002G089900	0	1311-1331	1322	0	0.0190362	1
ptc-miR160h	Potri.004G211700	2	1718-1738	1729	0	0.013323	1
ptc-miR164a	Potri.007G065400	2	729-749	740	0	0.00867864	1
ptc-miR164a	Potri.012G001400	2.5	641-661	652	0	0.00956382	1
ptc-miR164a	Potri.015G020000	2.5	641-661	652	0	0.00956382	1
ptc-miR164a	Potri.005G098200	2	910-930	921	0	0.00702245	1
ptc-miR164b	Potri.007G065400	2	729-749	740	0	0.00867864	1
ptc-miR164b	Potri.012G001400	2.5	641-661	652	0	0.00956382	1
ptc-miR164b	Potri.015G020000	2.5	641-661	652	0	0.00956382	1
ptc-miR164b	Potri.005G098200	2	910-930	921	0	0.00702245	1
ptc-miR164c	Potri.007G065400	2	729-749	740	0	0.00867864	1
ptc-miR164c	Potri.012G001400	2.5	641-661	652	0	0.00956382	1
ptc-miR164c	Potri.015G020000	2.5	641-661	652	0	0.00956382	1
ptc-miR164c	Potri.005G098200	2	910-930	921	0	0.00702245	1
ptc-miR164d	Potri.007G065400	2	729-749	740	0	0.00867864	1
ptc-miR164d	Potri.012G001400	2.5	641-661	652	0	0.00956382	1
ptc-miR164d	Potri.015G020000	2.5	641-661	652	0	0.00956382	1
ptc-miR164d	Potri.005G098200	2	910-930	921	0	0.00702245	1
ptc-miR164e	Potri.007G065400	2	729-749	740	0	0.00867864	1
ptc-miR164e	Potri.012G001400	2.5	641-661	652	0	0.00956382	1
ptc-miR164e	Potri.015G020000	2.5	641-661	652	0	0.00956382	1
ptc-miR164e	Potri.005G098200	2	910-930	921	0	0.00702245	1
ptc-miR166a	Potri.004G211300	2.5	551-571	562	1	0.0121418	1
ptc-miR166a	Potri.009G014500	3	563-583	574	1	0.0145525	1
ptc-miR166a	Potri.008G224600	5	536-556	547	3	0.0259519	1
ptc-miR166b	Potri.004G211300	2.5	551-571	562	1	0.0121418	1
ptc-miR166b	Potri.009G014500	3	563-583	574	1	0.0145525	1
ptc-miR166b	Potri.008G224600	5	536-556	547	3	0.0259519	1
ptc-miR166c	Potri.004G211300	2.5	551-571	562	1	0.0121418	1
ptc-miR166c	Potri.009G014500	3	563-583	574	1	0.0145525	1
ptc-miR166c	Potri.008G224600	5	536-556	547	3	0.0259519	1
ptc-miR166d	Potri.004G211300	2.5	551-571	562	1	0.0121418	1
ptc-miR166d	Potri.009G014500	3	563-583	574	1	0.0145525	1
ptc-miR166d	Potri.008G224600	5	536-556	547	3	0.0259519	1
ptc-miR166e	Potri.004G211300	2.5	551-571	562	1	0.0121418	1
ptc-miR166e	Potri.009G014500	3	563-583	574	1	0.0145525	1
ptc-miR166e	Potri.008G224600	5	536-556	547	3	0.0259519	1
ptc-miR166f	Potri.004G211300	2.5	551-571	562	1	0.0121418	1
ptc-miR166f	Potri.009G014500	3	563-583	574	1	0.0145525	1
ptc-miR166f	Potri.008G224600	5	536-556	547	3	0.0259519	1
ptc-miR166g	Potri.004G211300	2.5	551-571	562	1	0.0121418	1
ptc-miR166g	Potri.009G014500	3	563-583	574	1	0.0145525	1
ptc-miR166g	Potri.008G224600	5	536-556	547	3	0.0259519	1
ptc-miR166h	Potri.004G211300	2.5	551-571	562	1	0.0121418	1
ptc-miR166h	Potri.009G014500	3	563-583	574	1	0.0145525	1
ptc-miR166h	Potri.008G224600	5	536-556	547	3	0.0259519	1
ptc-miR166i	Potri.004G211300	2.5	551-571	562	1	0.0121418	1
ptc-miR166i	Potri.009G014500	3	563-583	574	1	0.0145525	1
ptc-miR166i	Potri.008G224600	5	536-556	547	3	0.0259519	1
ptc-miR166j	Potri.004G211300	2.5	551-571	562	1	0.0121418	1
ptc-miR166j	Potri.009G014500	3	563-583	574	1	0.0145525	1
ptc-miR166j	Potri.008G224600	5	536-556	547	3	0.0259519	1
ptc-miR166k	Potri.004G211300	2.5	551-571	562	1	0.0121418	1
ptc-miR166k	Potri.009G014500	3	563-583	574	1	0.0145525	1
ptc-miR166k	Potri.008G224600	5	536-556	547	3	0.0259519	1
ptc-miR166l	Potri.004G211300	2.5	551-571	562	1	0.0121418	1
ptc-miR166l	Potri.009G014500	3	563-583	574	1	0.0145525	1
ptc-miR166l	Potri.008G224600	5	536-556	547	3	0.0259519	1
ptc-miR166m	Potri.004G211300	2.5	551-571	562	1	0.0121418	1
ptc-miR166m	Potri.009G014500	3	563-583	574	1	0.0145525	1
ptc-miR166m	Potri.008G224600	5	536-556	547	3	0.0259519	1
ptc-miR166n	Potri.004G211300	2.5	551-571	562	1	0.0121418	1
ptc-miR166n	Potri.009G014500	3	563-583	574	1	0.0145525	1
ptc-miR166o	Potri.004G211300	2.5	551-571	562	1	0.0121418	1
ptc-miR166o	Potri.009G014500	3	563-583	574	1	0.0145525	1
ptc-miR166p	Potri.004G211300	4.5	551-571	562	1	0.0265176	1
ptc-miR166p	Potri.009G014500	5	563-583	574	1	0.0201544	1
ptc-miR166p	Potri.008G224600	5	536-556	547	3	0.032334	1
ptc-miR166q	Potri.004G211300	2.5	551-571	562	1	0.0121418	1
ptc-miR166q	Potri.009G014500	3	563-583	574	1	0.0145525	1
ptc-miR167a	Potri.017G141000	4	2599-2620	2610	0	0.0300471	1
ptc-miR167a	Potri.004G078200	4	1527-1548	1538	0	0.0243636	1
ptc-miR167a	Potri.018G098200	4	497-517	508	0	0.0222667	1
ptc-miR167b	Potri.017G141000	4	2599-2620	2610	0	0.0300471	1
ptc-miR167b	Potri.004G078200	4	1527-1548	1538	0	0.0243636	1
ptc-miR167b	Potri.018G098200	4	497-517	508	0	0.0222667	1
ptc-miR167c	Potri.017G141000	4	2599-2620	2610	0	0.0300471	1
ptc-miR167c	Potri.004G078200	4	1527-1548	1538	0	0.0243636	1
ptc-miR167c	Potri.018G098200	4	497-517	508	0	0.0222667	1
ptc-miR167d	Potri.017G141000	4	2599-2620	2610	0	0.0300471	1
ptc-miR167d	Potri.004G078200	4	1527-1548	1538	0	0.0243636	1
ptc-miR167d	Potri.018G098200	4	497-517	508	0	0.0222667	1
ptc-miR167e	Potri.017G141000	4.5	2599-2620	2610	0	0.0486963	1
ptc-miR167e	Potri.004G078200	4.5	1527-1548	1538	0	0.0395577	1
ptc-miR167e	Potri.018G098200	4	497-517	508	0	0.0122076	1
ptc-miR167f-3p	Potri.005G112900	4	499-520	511	3	0.0478253	1
ptc-miR167f-5p	Potri.001G358500	4.5	3080-3101	3091	0	0.0496127	1
ptc-miR167f-5p	Potri.011G091900	4.5	3266-3287	3277	0	0.0496127	1
ptc-miR167f-5p	Potri.018G098200	3	497-517	508	0	0.00262856	1
ptc-miR167g-3p	Potri.005G112900	4	499-520	511	3	0.0478253	1
ptc-miR167g-5p	Potri.001G358500	4.5	3080-3101	3091	0	0.0496127	1
ptc-miR167g-5p	Potri.011G091900	4.5	3266-3287	3277	0	0.0496127	1
ptc-miR167g-5p	Potri.018G098200	3	497-517	508	0	0.00262856	1
ptc-miR167h-3p	Potri.005G112900	4	499-520	511	3	0.0478253	1
ptc-miR168a-3p	Potri.003G154800	7	12鏈?1鏃?22	0	0.0464321	1
ptc-miR168a-3p	Potri.010G185600	6.5	3鏈?2鏃?13	1	0.0382804	1
ptc-miR168a-3p	Potri.018G057500	7	26-46	37	1	0.0129686	1
ptc-miR168a-3p	Potri.002G221400	6	269-289	280	3	0.0242839	1
ptc-miR168a-5p	Potri.003G154300	3.5	269-290	280	0	0.00255935	1
ptc-miR168a-5p	Potri.003G153600	2.5	236-256	247	0	0.00319816	1
ptc-miR168b-3p	Potri.003G154800	7	12鏈?1鏃?22	0	0.0464321	1
ptc-miR168b-3p	Potri.010G185600	6.5	3鏈?2鏃?13	1	0.0382804	1
ptc-miR168b-3p	Potri.018G057500	7	26-46	37	1	0.0129686	1
ptc-miR168b-3p	Potri.002G221400	6	269-289	280	3	0.0242839	1
ptc-miR168b-5p	Potri.003G154300	3.5	269-290	280	0	0.00255935	1
ptc-miR168b-5p	Potri.003G153600	2.5	236-256	247	0	0.00319816	1
ptc-miR169q	Potri.016G068200	3.5	1440-1460	1451	0	0.0219432	1
ptc-miR169q	Potri.006G145100	4	1346-1366	1357	1	0.0211922	1
ptc-miR169q	Potri.018G064700	4	1267-1287	1278	0	0.0219432	1
ptc-miR169q	Potri.009G060600	5	1266-1286	1277	0	0.0349153	1
ptc-miR169q	Potri.006G201900	3.5	911-931	922	0	0.0177785	1
ptc-miR169q	Potri.001G266000	5	1203-1223	1214	0	0.0268606	1
ptc-miR169t	Potri.016G068200	3	1440-1460	1451	0	0.024652	1
ptc-miR169t	Potri.006G145100	4.5	1346-1366	1357	1	0.0159366	1
ptc-miR169t	Potri.018G064700	4.5	1267-1287	1278	0	0.0165029	1
ptc-miR169t	Potri.009G060600	2.5	1266-1286	1277	0	0.0247746	1
ptc-miR169t	Potri.006G201900	3	911-931	922	0	0.0199784	1
ptc-miR169t	Potri.001G266000	2.5	1203-1223	1214	0	0.0190362	1
ptc-miR169t	Potri.001G257600	2.5	1405-1425	1416	1	0.0178584	1
ptc-miR169t	Potri.009G052900	2.5	1096-1116	1107	0	0.0202653	1
ptc-miR169u-5p	Potri.016G068200	3.5	1440-1460	1451	0	0.0281237	1
ptc-miR169u-5p	Potri.006G145100	5	1346-1366	1357	1	0.0301365	1
ptc-miR169u-5p	Potri.018G064700	5	1267-1287	1278	0	0.0311994	1
ptc-miR169u-5p	Potri.006G201900	3.5	911-931	922	0	0.0227997	1
ptc-miR169u-5p	Potri.009G060600	6	1173-1193	1184	0	0.0292161	1
ptc-miR171a-3p	Potri.014G060200	3	1711-1731	1722	0	0.0199784	1
ptc-miR171a-3p	Potri.002G144200	3	786-806	797	0	0.0199784	1
ptc-miR171a-3p	Potri.002G144700	3	1182-1202	1193	0	0.0199784	1
ptc-miR171a-3p	Potri.014G060500	3	984-1004	995	1	0.0187429	1
ptc-miR171b	Potri.014G060200	3	1711-1731	1722	0	0.0199784	1
ptc-miR171b	Potri.002G144200	3	786-806	797	0	0.0199784	1
ptc-miR171b	Potri.002G144700	3	1182-1202	1193	0	0.0199784	1
ptc-miR171b	Potri.014G060500	3	984-1004	995	1	0.0187429	1
ptc-miR171c	Potri.001G122800	1	1305-1325	1316	0	0.0246761	1
ptc-miR171c	Potri.014G060200	1	1714-1734	1725	1	0.0250519	1
ptc-miR171d	Potri.001G122800	1	1305-1325	1316	0	0.0246761	1
ptc-miR171d	Potri.014G060200	1	1714-1734	1725	1	0.0250519	1
ptc-miR171e	Potri.001G122800	1	1305-1325	1316	0	0.0246761	1
ptc-miR171e	Potri.014G060200	1	1714-1734	1725	1	0.0250519	1
ptc-miR171f	Potri.001G122800	1	1305-1325	1316	0	0.0246761	1
ptc-miR171f	Potri.014G060200	1	1714-1734	1725	1	0.0250519	1
ptc-miR171g-3p	Potri.001G122800	1	1305-1325	1316	0	0.0246761	1
ptc-miR171g-3p	Potri.014G060200	1	1714-1734	1725	1	0.0250519	1
ptc-miR171h-3p	Potri.001G122800	1	1305-1325	1316	0	0.0246761	1
ptc-miR171h-3p	Potri.014G060200	1	1714-1734	1725	1	0.0250519	1
ptc-miR171i	Potri.001G122800	1	1305-1325	1316	0	0.0246761	1
ptc-miR171i	Potri.014G060200	1	1714-1734	1725	1	0.0250519	1
ptc-miR171j	Potri.002G147300	6.5	455-473	465	1	0.0488068	1
ptc-miR171l-3p	Potri.002G147300	6.5	455-473	465	1	0.0488068	1
ptc-miR171m	Potri.002G147300	6.5	455-473	465	1	0.0488068	1
ptc-miR172a	Potri.006G132400	3	1343-1363	1354	0	0.024652	1
ptc-miR172a	Potri.005G140700	2	1744-1764	1755	0	0.0215556	1
ptc-miR172a	Potri.016G084500	3	1232-1252	1243	0	0.024652	1
ptc-miR172a	Potri.008G045300	2	1364-1384	1375	0	0.0215556	1
ptc-miR172a	Potri.010G216200	2	1316-1336	1327	0	0.0215556	1
ptc-miR172a	Potri.007G046200	3	2019-2039	2030	0	0.024652	1
ptc-miR172b-3p	Potri.006G132400	3	1343-1363	1354	0	0.024652	1
ptc-miR172b-3p	Potri.005G140700	2	1744-1764	1755	0	0.0215556	1
ptc-miR172b-3p	Potri.016G084500	3	1232-1252	1243	0	0.024652	1
ptc-miR172b-3p	Potri.008G045300	2	1364-1384	1375	0	0.0215556	1
ptc-miR172b-3p	Potri.010G216200	2	1316-1336	1327	0	0.0215556	1
ptc-miR172b-3p	Potri.007G046200	3	2019-2039	2030	0	0.024652	1
ptc-miR172c	Potri.006G132400	3	1343-1363	1354	0	0.024652	1
ptc-miR172c	Potri.005G140700	2	1744-1764	1755	0	0.0215556	1
ptc-miR172c	Potri.016G084500	3	1232-1252	1243	0	0.024652	1
ptc-miR172c	Potri.008G045300	2	1364-1384	1375	0	0.0215556	1
ptc-miR172c	Potri.010G216200	2	1316-1336	1327	0	0.0215556	1
ptc-miR172c	Potri.007G046200	3	2019-2039	2030	0	0.024652	1
ptc-miR172d	Potri.006G132400	3	1343-1363	1354	0	0.0141622	1
ptc-miR172d	Potri.005G140700	2.5	1744-1764	1755	0	0.023492	1
ptc-miR172d	Potri.016G084500	3	1232-1252	1243	0	0.0141622	1
ptc-miR172d	Potri.008G045300	2.5	1364-1384	1375	0	0.023492	1
ptc-miR172d	Potri.010G216200	2.5	1316-1336	1327	0	0.023492	1
ptc-miR172d	Potri.007G046200	2	2019-2039	2030	0	0.00434878	1
ptc-miR172e	Potri.006G132400	3	1343-1363	1354	0	0.0141622	1
ptc-miR172e	Potri.005G140700	2.5	1744-1764	1755	0	0.023492	1
ptc-miR172e	Potri.016G084500	3	1232-1252	1243	0	0.0141622	1
ptc-miR172e	Potri.008G045300	2.5	1364-1384	1375	0	0.023492	1
ptc-miR172e	Potri.010G216200	2.5	1316-1336	1327	0	0.023492	1
ptc-miR172e	Potri.007G046200	2	2019-2039	2030	0	0.00434878	1
ptc-miR172f	Potri.006G132400	3	1343-1363	1354	0	0.024652	1
ptc-miR172f	Potri.005G140700	2	1744-1764	1755	0	0.0215556	1
ptc-miR172f	Potri.016G084500	3	1232-1252	1243	0	0.024652	1
ptc-miR172f	Potri.008G045300	2	1364-1384	1375	0	0.0215556	1
ptc-miR172f	Potri.010G216200	2	1316-1336	1327	0	0.0215556	1
ptc-miR172f	Potri.007G046200	3	2019-2039	2030	0	0.024652	1
ptc-miR172g-3p	Potri.006G132400	2	1343-1363	1354	0	0.017282	1
ptc-miR172g-3p	Potri.005G140700	1.5	1744-1764	1755	0	0.00946386	1
ptc-miR172g-3p	Potri.016G084500	2	1232-1252	1243	0	0.017282	1
ptc-miR172g-3p	Potri.008G045300	2	1364-1384	1375	0	0.017282	1
ptc-miR172g-3p	Potri.010G216200	2	1316-1336	1327	0	0.017282	1
ptc-miR172g-3p	Potri.007G046200	1	2019-2039	2030	0	0.00513743	1
ptc-miR172h-3p	Potri.006G132400	2	1343-1363	1354	0	0.017282	1
ptc-miR172h-3p	Potri.005G140700	1.5	1744-1764	1755	0	0.00946386	1
ptc-miR172h-3p	Potri.016G084500	2	1232-1252	1243	0	0.017282	1
ptc-miR172h-3p	Potri.008G045300	2	1364-1384	1375	0	0.017282	1
ptc-miR172h-3p	Potri.010G216200	2	1316-1336	1327	0	0.017282	1
ptc-miR172h-3p	Potri.007G046200	1	2019-2039	2030	0	0.00513743	1
ptc-miR2111a	Potri.009G020800	7	972-991	983	1	0.0430989	1
ptc-miR2111b	Potri.009G020800	7	972-991	983	1	0.0430989	1
ptc-miR319a	Potri.011G096600	4	1552-1571	1562	0	0.0243636	1
ptc-miR319a	Potri.010G195700	6.5	266-285	276	3	0.018029	1
ptc-miR319a	Potri.001G414200	4.5	2066-2085	2076	0	0.0341537	1
ptc-miR319b	Potri.011G096600	4	1552-1571	1562	0	0.0243636	1
ptc-miR319b	Potri.010G195700	6.5	266-285	276	3	0.018029	1
ptc-miR319b	Potri.001G414200	4.5	2066-2085	2076	0	0.0341537	1
ptc-miR319c	Potri.011G096600	4	1552-1571	1562	0	0.0243636	1
ptc-miR319c	Potri.010G195700	6.5	266-285	276	3	0.018029	1
ptc-miR319c	Potri.001G414200	4.5	2066-2085	2076	0	0.0341537	1
ptc-miR319d	Potri.011G096600	4	1552-1571	1562	0	0.0243636	1
ptc-miR319d	Potri.010G195700	6.5	266-285	276	3	0.018029	1
ptc-miR319d	Potri.001G414200	4.5	2066-2085	2076	0	0.0341537	1
ptc-miR319e	Potri.011G096600	3	1552-1571	1562	0	0.0143114	1
ptc-miR319e	Potri.010G195700	7	266-285	276	3	0.0236395	1
ptc-miR319e	Potri.001G213300	7	1188-1207	1198	3	0.0236395	1
ptc-miR319e	Potri.005G149800	3.5	1454-1473	1464	2	0.03467	1
ptc-miR319f	Potri.011G096600	3	1552-1571	1562	0	0.0143114	1
ptc-miR319f	Potri.010G195700	7	266-285	276	3	0.0236395	1
ptc-miR319f	Potri.001G213300	7	1188-1207	1198	3	0.0236395	1
ptc-miR319f	Potri.005G149800	3.5	1454-1473	1464	2	0.03467	1
ptc-miR319g	Potri.011G096600	3	1552-1571	1562	0	0.0143114	1
ptc-miR319g	Potri.010G195700	7	266-285	276	3	0.0236395	1
ptc-miR319g	Potri.001G213300	7	1188-1207	1198	3	0.0236395	1
ptc-miR319g	Potri.005G149800	3.5	1454-1473	1464	2	0.03467	1
ptc-miR319h	Potri.011G096600	3	1552-1571	1562	0	0.0143114	1
ptc-miR319h	Potri.010G195700	7	266-285	276	3	0.0236395	1
ptc-miR319h	Potri.001G213300	7	1188-1207	1198	3	0.0236395	1
ptc-miR319h	Potri.005G149800	3.5	1454-1473	1464	2	0.03467	1
ptc-miR390d-3p	Potri.012G095200	5.5	1232-1251	1242	1	0.0411744	0
ptc-miR393a-5p	Potri.002G207800	1	1763-1782	1773	0	0.0102485	1
ptc-miR393a-5p	Potri.014G134800	1	1606-1625	1616	0	0.0102485	1
ptc-miR393a-5p	Potri.001G323100	2	1982-2002	1993	0	0.00867864	1
ptc-miR393a-5p	Potri.017G061600	2	1954-1974	1965	0	0.00867864	1
ptc-miR393b-5p	Potri.002G207800	1	1763-1782	1773	0	0.0102485	1
ptc-miR393b-5p	Potri.014G134800	1	1606-1625	1616	0	0.0102485	1
ptc-miR393b-5p	Potri.001G323100	2	1982-2002	1993	0	0.00867864	1
ptc-miR393b-5p	Potri.017G061600	2	1954-1974	1965	0	0.00867864	1
ptc-miR393c	Potri.002G207800	1	1763-1782	1773	0	0.0102485	1
ptc-miR393c	Potri.014G134800	1	1606-1625	1616	0	0.0102485	1
ptc-miR393c	Potri.001G323100	2	1982-2002	1993	0	0.00867864	1
ptc-miR393c	Potri.017G061600	2	1954-1974	1965	0	0.00867864	1
ptc-miR394a-5p	Potri.001G057100	1	1197-1216	1207	0	0.00829395	1
ptc-miR394b-5p	Potri.001G057100	1	1197-1216	1207	0	0.00829395	1
ptc-miR396a	Potri.012G022600	3	783-804	794	0	0.038465	1
ptc-miR396a	Potri.001G114000	4	670-691	681	0	0.0407481	1
ptc-miR396a	Potri.018G065400	3	330-351	341	0	0.038465	1
ptc-miR396a	Potri.013G077500	3	399-420	410	0	0.038465	1
ptc-miR396a	Potri.018G126700	3.5	474-494	485	0	0.0342652	1
ptc-miR396a	Potri.006G143200	3	339-360	350	0	0.0405479	1
ptc-miR396a	Potri.015G006200	3	624-645	635	0	0.0405479	1
ptc-miR396a	Potri.014G071800	4	435-456	446	0	0.0429519	1
ptc-miR396a	Potri.014G007200	3.5	859-880	870	0	0.0277953	1
ptc-miR396a	Potri.007G007100	3.5	1101-1122	1112	0	0.0277953	1
ptc-miR396a	Potri.001G082700	3	690-711	701	0	0.0285371	1
ptc-miR396b	Potri.012G022600	3	783-804	794	0	0.038465	1
ptc-miR396b	Potri.001G114000	4	670-691	681	0	0.0407481	1
ptc-miR396b	Potri.018G065400	3	330-351	341	0	0.038465	1
ptc-miR396b	Potri.013G077500	3	399-420	410	0	0.038465	1
ptc-miR396b	Potri.018G126700	3.5	474-494	485	0	0.0342652	1
ptc-miR396b	Potri.006G143200	3	339-360	350	0	0.0405479	1
ptc-miR396b	Potri.015G006200	3	624-645	635	0	0.0405479	1
ptc-miR396b	Potri.014G071800	4	435-456	446	0	0.0429519	1
ptc-miR396b	Potri.014G007200	3.5	859-880	870	0	0.0277953	1
ptc-miR396b	Potri.007G007100	3.5	1101-1122	1112	0	0.0277953	1
ptc-miR396b	Potri.001G082700	3	690-711	701	0	0.0285371	1
ptc-miR396c	Potri.001G114000	3.5	670-691	681	0	0.0157233	1
ptc-miR396c	Potri.014G071800	3	435-456	446	0	0.022325	1
ptc-miR396c	Potri.001G082700	4	690-711	701	0	0.0498906	1
ptc-miR396c	Potri.012G022600	4	783-804	794	0	0.0498906	1
ptc-miR396c	Potri.018G127000	2	246-266	257	4	0.0475197	1
ptc-miR396c	Potri.013G013600	5	586-607	597	1	0.0384034	1
ptc-miR396c	Potri.018G126700	4.5	474-494	485	0	0.0394078	1
ptc-miR396d	Potri.001G114000	3.5	670-691	681	0	0.0157233	1
ptc-miR396d	Potri.014G071800	3	435-456	446	0	0.022325	1
ptc-miR396d	Potri.001G082700	4	690-711	701	0	0.0498906	1
ptc-miR396d	Potri.012G022600	4	783-804	794	0	0.0498906	1
ptc-miR396d	Potri.018G127000	2	246-266	257	4	0.0475197	1
ptc-miR396d	Potri.013G013600	5	586-607	597	1	0.0384034	1
ptc-miR396d	Potri.018G126700	4.5	474-494	485	0	0.0394078	1
ptc-miR396e-3p	Potri.018G126700	1.5	379-398	389	0	0.00383656	1
ptc-miR396e-5p	Potri.001G114000	3.5	670-691	681	0	0.0157233	1
ptc-miR396e-5p	Potri.014G071800	3	435-456	446	0	0.022325	1
ptc-miR396e-5p	Potri.001G082700	4	690-711	701	0	0.0498906	1
ptc-miR396e-5p	Potri.012G022600	4	783-804	794	0	0.0498906	1
ptc-miR396e-5p	Potri.018G127000	2	246-266	257	4	0.0475197	1
ptc-miR396e-5p	Potri.013G013600	5	586-607	597	1	0.0384034	1
ptc-miR396e-5p	Potri.018G126700	4.5	474-494	485	0	0.0394078	1
ptc-miR396f	Potri.012G022600	4	783-804	794	0	0.0219432	1
ptc-miR396f	Potri.003G100800	3	506-527	517	0	0.0350302	0
ptc-miR396f	Potri.018G065400	3	330-351	341	0	0.0350302	1
ptc-miR396f	Potri.013G077500	3	399-420	410	0	0.0350302	1
ptc-miR396f	Potri.018G126700	4.5	474-494	485	0	0.0464321	1
ptc-miR396f	Potri.006G143200	3	339-360	350	0	0.0369307	1
ptc-miR396f	Potri.015G006200	4	624-645	635	0	0.0231422	1
ptc-miR396f	Potri.008G035800	4.5	756-776	767	0	0.0489353	1
ptc-miR396f	Potri.014G007200	3.5	859-880	870	0	0.0152582	1
ptc-miR396f	Potri.015G071300	3.5	163-183	174	0	0.0152582	1
ptc-miR396f	Potri.007G007100	3.5	1101-1122	1112	0	0.0152582	1
ptc-miR396f	Potri.002G115100	3.5	759-780	770	0	0.0152582	1
ptc-miR396f	Potri.001G082700	3	690-711	701	0	0.0259768	1
ptc-miR396f	Potri.001G114000	5	670-691	681	0	0.0353763	1
ptc-miR396g-3p	Potri.018G126700	4.5	378-398	389	0	0.0302835	1
ptc-miR396g-5p	Potri.001G114000	4.5	670-691	681	0	0.0281237	1
ptc-miR396g-5p	Potri.008G035800	3.5	756-776	767	0	0.00666744	1
ptc-miR396g-5p	Potri.014G007200	4	859-880	870	0	0.0459968	1
ptc-miR396g-5p	Potri.018G065400	4	330-351	341	0	0.0459968	1
ptc-miR396g-5p	Potri.015G071300	4.5	163-183	174	0	0.0227997	1
ptc-miR396g-5p	Potri.007G007100	4	1101-1122	1112	0	0.0459968	1
ptc-miR396g-5p	Potri.013G077500	4	399-420	410	0	0.0459968	1
ptc-miR396g-5p	Potri.002G115100	4	759-780	770	0	0.0459968	1
ptc-miR396g-5p	Potri.001G082700	4	690-711	701	0	0.0420787	1
ptc-miR396g-5p	Potri.012G022600	5	783-804	794	0	0.0474202	1
ptc-miR396g-5p	Potri.018G127000	3	246-266	257	4	0.039051	1
ptc-miR398c-5p	Potri.001G247100	5	4124-4144	4135	1	0.0261043	0
ptc-miR399e	Potri.002G038900	5.5	248-268	259	1	0.0312429	0
ptc-miR403a	Potri.001G235800	7	608-629	620	0	0.0342025	1
ptc-miR403a	Potri.009G162800	6.5	965-985	976	1	0.0463793	1
ptc-miR403a	Potri.013G099200	5	783-803	794	1	0.0119413	1
ptc-miR403b	Potri.001G235800	7	608-629	620	0	0.0342025	1
ptc-miR403b	Potri.009G162800	6.5	965-985	976	1	0.0463793	1
ptc-miR403b	Potri.013G099200	5	783-803	794	1	0.0119413	1
ptc-miR403c-3p	Potri.001G235800	7	608-629	620	0	0.0342025	1
ptc-miR403c-3p	Potri.009G162800	6.5	965-985	976	1	0.0463793	1
ptc-miR403c-3p	Potri.013G099200	5	783-803	794	1	0.0119413	1
ptc-miR403d	Potri.001G235800	7	608-629	620	0	0.0342025	1
ptc-miR403d	Potri.009G162800	6.5	965-985	976	1	0.0463793	1
ptc-miR403d	Potri.013G099200	5	783-803	794	1	0.0119413	1
ptc-miR408-5p	Potri.015G037500	6	242-262	253	1	0.0409105	0
ptc-miR472a	Potri.018G111200	6.5	2028-2049	2040	0	0.0463024	1
ptc-miR472a	Potri.017G133600	4	580-601	592	0	0.0287291	1
ptc-miR472a	Potri.006G187900	7	1802-1823	1814	0	0.0305163	1
ptc-miR472b	Potri.018G111200	4.5	2028-2049	2040	0	0.0247746	0
ptc-miR472b	Potri.003G034200	6.5	514-535	526	1	0.0426034	0
ptc-miR472b	Potri.001G261700	5.5	1102-1123	1114	0	0.0450796	0
ptc-miR472b	Potri.006G187900	5	1802-1823	1814	0	0.0426208	1
ptc-miR473a-5p	Potri.013G073900	4.5	2228-2247	2238	1	0.044332	0
ptc-miR473a-5p	Potri.007G100200	4	1191-1210	1201	0	0.0374017	0
ptc-miR475a-3p	Potri.006G242200	2	545-565	556	1	0.0330997	1
ptc-miR475a-3p	Potri.019G021200	2	663-683	674	1	0.0330997	1
ptc-miR475a-3p	Potri.006G271400	2	486-506	497	0	0.0342652	1
ptc-miR475a-3p	Potri.011G057900	3.5	903-923	914	1	0.0215294	1
ptc-miR475a-3p	Potri.006G271200	2	432-452	443	0	0.0335027	1
ptc-miR475a-3p	Potri.013G034400	2	1068-1088	1079	0	0.0277953	1
ptc-miR475a-3p	Potri.013G130600	4	318-338	329	1	0.0208036	1
ptc-miR475b-3p	Potri.006G242200	2	545-565	556	1	0.0330997	1
ptc-miR475b-3p	Potri.019G021200	2	663-683	674	1	0.0330997	1
ptc-miR475b-3p	Potri.006G271400	2	486-506	497	0	0.0342652	1
ptc-miR475b-3p	Potri.011G057900	3.5	903-923	914	1	0.0215294	1
ptc-miR475b-3p	Potri.006G271200	2	432-452	443	0	0.0335027	1
ptc-miR475b-3p	Potri.013G034400	2	1068-1088	1079	0	0.0277953	1
ptc-miR475b-3p	Potri.013G130600	4	318-338	329	1	0.0208036	1
ptc-miR475d-3p	Potri.006G242200	1	545-565	556	1	0.0342086	1
ptc-miR475d-3p	Potri.019G021200	1	663-683	674	1	0.0342086	1
ptc-miR475d-3p	Potri.006G271400	1	486-506	497	0	0.0354125	1
ptc-miR475d-3p	Potri.011G057900	2.5	903-923	914	1	0.0115919	1
ptc-miR475d-3p	Potri.006G271200	1	432-452	443	0	0.0346248	1
ptc-miR475d-3p	Potri.013G130600	3	318-338	329	1	0.0134239	1
ptc-miR477a-5p	Potri.010G195700	7	439-458	449	3	0.00799629	1
ptc-miR477b	Potri.010G195700	7	439-458	449	3	0.00799629	1
ptc-miR477d-3p	Potri.011G123900	3.5	56-75	66	2	0.03467	0
ptc-miR477d-5p	Potri.005G223600	6	1517-1538	1529	0	0.0384418	0
ptc-miR478p	Potri.002G034100	6.5	962-985	976	0	0.0157626	1
ptc-miR482a.2	Potri.T004200	3.5	789-808	799	0	0.0188382	0
ptc-miR482a.2	Potri.T003600	3.5	653-672	663	0	0.0152582	0
ptc-miR482b-3p	Potri.008G113700	6	701-722	713	0	0.038465	0
ptc-miR482b-3p	Potri.001G013700	4.5	557-578	569	0	0.0141622	0
ptc-miR482b-3p	Potri.006G110000	4	1592-1613	1604	1	0.00524075	0
ptc-miR482c-3p	Potri.005G136200	5	869-890	881	0	0.0472516	0
ptc-miR482c-3p	Potri.017G133600	6.5	580-601	592	0	0.0370933	1
ptc-miR482c-3p	Potri.008G123500	6.5	922-942	933	1	0.0348183	0
ptc-miR482c-5p	Potri.017G011900	5.5	430-451	442	3	0.0464275	0
ptc-miR482d-3p	Potri.006G007900	2	118-139	130	0	0.00867864	0
ptc-miR482d-3p	Potri.006G274800	6	654-675	666	1	0.027595	0
ptc-miR482d-5p	Potri.014G195700	5	1562-1583	1574	0	0.0351943	0
ptc-miR482d-5p	Potri.001G084000	6.5	553-575	566	3	0.0494284	0
ptc-miR6421-3p	Potri.017G055000	4.5	2435-2454	2446	0	0.0485546	0
ptc-miR6421-3p	Potri.003G190300	2.5	237-257	248	1	0.0112722	0
ptc-miR6421-3p	Potri.001G034700	4	180-200	191	1	0.0225454	0
ptc-miR6432	Potri.010G234300	5	995-1014	1006	0	0.0415182	0
ptc-miR6434	Potri.006G229300	3.5	2698-2717	2708	0	0.00617662	0
ptc-miR6434	Potri.009G140200	5.5	1012-1031	1022	1	0.0244174	0
ptc-miR6438a	Potri.006G069600	5	997-1018	1009	0	0.0285875	1
ptc-miR6438a	Potri.012G102200	7	1563-1584	1575	0	0.0305163	1
ptc-miR6438b	Potri.006G069600	5	997-1018	1009	0	0.0285875	1
ptc-miR6438b	Potri.012G102200	7	1563-1584	1575	0	0.0305163	1
ptc-miR6443	Potri.007G140600	0.5	1197-1217	1208	0	0.00553152	0
ptc-miR6445a	Potri.002G182400	1	14-35	26	0	0.0203919	1
ptc-miR6445a	Potri.013G079700	1	85-106	97	1	0.0193276	1
ptc-miR6445b	Potri.002G182400	1	14-35	26	0	0.0203919	1
ptc-miR6445b	Potri.013G079700	1	85-106	97	1	0.0193276	1
ptc-miR6455	Potri.016G014300	4.5	1015-1034	1025	1	0.0345192	0
ptc-miR6457b	Potri.001G078100	4	274-294	285	0	0.0231422	0
ptc-miR6457b	Potri.001G077600	2	539-559	550	3	0.0314698	0
ptc-miR6459a-3p	Potri.005G234000	3	206-226	217	3	0.0260963	0
ptc-miR6462a	Potri.001G078100	4	215-235	226	3	0.0270496	1
ptc-miR6462b	Potri.001G078100	4	215-235	226	3	0.0270496	1
ptc-miR6462c-3p	Potri.001G078100	4	215-235	226	3	0.0270496	1
ptc-miR6462c-5p	Potri.015G013900	5	946-966	958	1	0.0469165	0
ptc-miR6462d	Potri.001G078100	4	215-235	226	3	0.0270496	1
ptc-miR6462e	Potri.001G077600	0.5	464-483	474	1	0.0464963	1
ptc-miR6462f	Potri.001G077600	0.5	464-483	474	1	0.0464963	1
ptc-miR6466-5p	Potri.015G062100	4	246-265	257	0	0.0259321	0
ptc-miR6469	Potri.005G215600	0	3155-3175	3166	0	0.00592545	0
ptc-miR6478	Potri.002G120100	5.5	210-230	221	3	0.0392158	0
ptc-miR7813	Potri.008G155800	4.5	335-355	346	0	0.0432425	0
ptc-miR7819	Potri.010G195700	6.5	286-305	296	3	0.0214562	0
ptc-miR7826	Potri.016G003400	3	1432-1452	1443	4	0.039051	0
ptc-miR7829	Potri.004G163600	6.5	375-394	385	1	0.0432724	0
ptc-miR7833	Potri.014G093900	4	702-721	713	3	0.0343992	0
ptc-miR7833	Potri.001G245000	6.5	1066-1085	1076	1	0.0365187	0
ptc-miR827	Potri.005G229700	6.5	355-374	366	1	0.0310534	0
ptc-miR828a	Potri.018G049000	3	332-353	344	0	0.0176712	1
ptc-miR828a	Potri.012G080400	3	313-334	325	0	0.0176712	1
ptc-miR828a	Potri.018G127700	3	371-392	383	0	0.0176712	1
ptc-miR828a	Potri.001G169600	1	451-472	463	0	0.0203919	1
ptc-miR828a	Potri.003G064600	1	343-364	355	0	0.0203919	1
ptc-miR828a	Potri.017G113800	1	122-143	134	0	0.0199349	1
ptc-miR828a	Potri.015G075600	5	561-582	573	0	0.0358957	1
ptc-miR828a	Potri.003G079100	1	334-355	346	1	0.017883	1
ptc-miR828b-5p	Potri.018G049000	3	332-353	344	0	0.0176712	1
ptc-miR828b-5p	Potri.012G080400	3	313-334	325	0	0.0176712	1
ptc-miR828b-5p	Potri.018G127700	3	371-392	383	0	0.0176712	1
ptc-miR828b-5p	Potri.001G169600	1	451-472	463	0	0.0203919	1
ptc-miR828b-5p	Potri.003G064600	1	343-364	355	0	0.0203919	1
ptc-miR828b-5p	Potri.017G113800	1	122-143	134	0	0.0199349	1
ptc-miR828b-5p	Potri.015G075600	5	561-582	573	0	0.0358957	1
ptc-miR828b-5p	Potri.003G079100	1	334-355	346	1	0.017883	1
