# Supplementary material for: Transposon-associated small RNAs involved in plant defense in poplar
Source: Research Square preprint supplement (doi:10.21203/rs.3.rs-154563/v1), 2021-02-11
Supplement: Supplementary file 1 [file 5196460a989ff46eb8ca1cda.docx]

**Figure S2**. Length distribution and siRNA detection of small RNA reads.

**Transposon-associated small RNAs involved in plant defense in poplar**

Running title: Possible large-scale regulation between plant and pathogens mediated by cross-kingdom siRNAs

Sijia Liu1,2,3, Xian Li1,2,3, Yiyang Zhao1,2,3, and Jianbo Xie1,2,3,*
