# Supplementary material for: Transposon-associated small RNAs involved in plant defense in poplar
Source: Research Square preprint supplement (doi:10.21203/rs.3.rs-154563/v1), 2021-02-11
Supplement: Supplementary file 3 [file 5f3e4fa04080bf3bd884658e.xlsx]

## Sheet: Sheet1
Data S2. The siRNA clusters in transposons.
Elements	Chromosome	Start	End	siRNA clusters	Clutser Start	Cluster End
hAT-6_PTr_9	Chr01	21102	22571	cluster33;	21346;	21712;
SINE2-1_PTr_136	Chr01	416832	417028	cluster271;	416849;	417009;
hAT-1N_PTr_191	Chr01	615507	615984	cluster375;	615505;	615761;
Copia-56_PTr-I_315	Chr01	969067	971140	cluster609;	969131;	969999;
Gypsy-79_PTr-LTR_346	Chr01	1056159	1056641	cluster649;	1056019;	1056701;
Gypsy-79_PTr-LTR_377	Chr01	1083346	1084412	cluster675;	1083470;	1083567;
L1-4_PTr_420	Chr01	1154234	1158052	cluster751;	1156281;	1156378;
DNA-3-1_PTr_432	Chr01	1223941	1224897	cluster787;	1223944;	1224897;
Helitron-N1_PTr_448	Chr01	1268549	1268697	cluster806;	1268620;	1268678;
Copia3-PTR_I-int_454	Chr01	1274748	1275196	cluster812;	1274792;	1274830;
Copia47-PTR_LTR_464	Chr01	1289786	1289963	cluster819;	1289762;	1289850;
Copia43-PTR_I-int_480	Chr01	1334127	1335183	cluster851;	1334989;	1335221;
Copia43-PTR_I-int_482	Chr01	1336191	1337718	cluster852;	1336480;	1337627;
Copia-3_PTri-I_484	Chr01	1340457	1340669	cluster854;	1340454;	1340753;
Copia-3_PTri-I_485	Chr01	1340670	1340748	cluster854;	1340454;	1340753;
Gypsy-73_PTr-LTR_518	Chr01	1449424	1450254	cluster916;	1449789;	1449916;
Ogre-PT2_I-int_545	Chr01	1496594	1499303	cluster948;	1497584;	1499094;
EnSpm1B_PT_548	Chr01	1500130	1500603	cluster950;	1499971;	1500435;
Helitron-1_PTr_570	Chr01	1539218	1539352	cluster982;	1539154;	1539322;
SINE2-1_PTr_581	Chr01	1571464	1571577	cluster1007;	1571422;	1571577;
L1-4_PTr_622	Chr01	1678610	1679288	cluster1065;	1678618;	1679912;
Gypsy-26_PTr-LTR_623	Chr01	1679289	1679525	cluster1065;	1678618;	1679912;
Gypsy-26_PTr-LTR_624	Chr01	1679594	1680112	cluster1065;	1678618;	1679912;
Gypsy-26_PTr-LTR_635	Chr01	1688227	1688745	cluster1077;	1688707;	1688766;
Copia43-PTR_I-int_644	Chr01	1712642	1712962	cluster1086;	1712764;	1713588;
Copia43-PTR_I-int_645	Chr01	1712954	1713630	cluster1086;	1712764;	1713588;
SINE2-1_PTr_653	Chr01	1744128	1744322	cluster1100;	1744146;	1744302;
GYPOT1_LTR_678	Chr01	1790832	1792930	cluster1117;	1790766;	1792933;
Helitron-2_PTr_696	Chr01	1882931	1884150	cluster1170;	1880912;	1883760;
DNA-3-1_PTr_697	Chr01	1884569	1885278	cluster1172;	1884664;	1885365;
PTr-3_759	Chr01	2061134	2061279	cluster1245;	2061147;	2061265;
Copia-93_PTr-LTR_775	Chr01	2107897	2108320	cluster1266;	2107920;	2108407;
ENSPM1_PT_778	Chr01	2129325	2129401	cluster1279;	2129329;	2129587;
EnSpm3_PT_779	Chr01	2129402	2129561	cluster1279;	2129329;	2129587;
ENSPM1_PT_780	Chr01	2129562	2129600	cluster1279;	2129329;	2129587;
SINE2-1_PTr_818	Chr01	2276812	2277006	cluster1344;	2276812;	2277005;
Gypsy-76_PTr-LTR_819	Chr01	2281523	2281736	cluster1347;	2281566;	2281607;
Helitron-N3_PTr_848	Chr01	2354138	2354477	cluster1388;	2354208;	2354351;
Copia-3_PTri-I_856	Chr01	2381852	2382065	cluster1403;	2381967;	2382037;
Helitron-1_PTr_880	Chr01	2596000	2596706	cluster1497;	2596435;	2596540;
SINE2-2_PTr_881	Chr01	2601145	2601311	cluster1500;	2601184;	2601310;
Helitron-N2_PTr_920	Chr01	2757979	2758765	cluster1589;	2758031;	2758556;
Gypsy-71_PTr-LTR_924	Chr01	2763026	2763152	cluster1591;	2763026;	2763869;
hAT-4_PTr_925	Chr01	2763153	2763467	cluster1591;	2763026;	2763869;
hAT-4_PTr_926	Chr01	2763450	2763870	cluster1591;	2763026;	2763869;
Gypsy-30_PTr-LTR_931	Chr01	2785078	2785835	cluster1597;	2785051;	2785974;
Ogre-PT2_I-int_941	Chr01	2795848	2807616	cluster1610;cluster1614;cluster1620;	2797473;2800506;2804260;	2798463;2801917;2804619;
Helitron-N3_PTr_963	Chr01	2849581	2850649	cluster1662;	2849975;	2850707;
Gypsy-26_PTr-LTR_969	Chr01	2857634	2858289	cluster1671;	2858012;	2858422;
POPGY2_LTR_1007	Chr01	2952980	2953650	cluster1729;	2952986;	2953631;
Copia-54_PTr-LTR_1017	Chr01	2977395	2977559	cluster1749;	2977395;	2982275;
Copia-54_PTr-I_1018	Chr01	2977560	2977632	cluster1749;	2977395;	2982275;
Copia-54_PTr-I_1019	Chr01	2977699	2982129	cluster1749;	2977395;	2982275;
Copia-54_PTr-LTR_1020	Chr01	2982130	2982294	cluster1749;	2977395;	2982275;
Gypsy-73_PTr-LTR_1022	Chr01	2983779	2985243	cluster1750;	2983884;	2984381;
Helitron-1_PTr_1035	Chr01	3024772	3024895	cluster1771;	3024757;	3024891;
hAT-3_PTr_1084	Chr01	3200613	3200809	cluster1860;	3200616;	3200959;
hAT-3_PTr_1085	Chr01	3200819	3200957	cluster1860;	3200616;	3200959;
Helitron-1_PTr_1086	Chr01	3201344	3202258	cluster1861;	3201506;	3201742;
PTr-3_1091	Chr01	3216137	3216298	cluster1869;	3216105;	3216330;
Gypsy-73_PTr-LTR_1114	Chr01	3260699	3261086	cluster1888;	3260857;	3261118;
Copia-56_PTr-LTR_1153	Chr01	3303036	3303170	cluster1929;	3302943;	3303326;
Gypsy-79_PTr-LTR_1175	Chr01	3325209	3325550	cluster1960;	3325300;	3325447;
ENSPM1_PT_1181	Chr01	3328249	3328301	cluster1966;	3328244;	3331799;
ENSPM1_PT_1182	Chr01	3328268	3331143	cluster1966;	3328244;	3331799;
Helitron-1_PTr_1190	Chr01	3344781	3344921	cluster1972;	3344894;	3344927;
Helitron-N3_PTr_1201	Chr01	3353764	3354820	cluster1985;	3354203;	3354447;
Copia-3_PTri-I_1236	Chr01	3408419	3408638	cluster2031;	3408340;	3409247;
Copia-3_PTri-I_1237	Chr01	3408639	3408716	cluster2031;	3408340;	3409247;
Gypsy18-PTR_LTR_1238	Chr01	3408717	3409243	cluster2031;	3408340;	3409247;
Copia10-PTR_I-int_1245	Chr01	3429541	3433968	cluster2049;	3433323;	3433970;
Gypsy-29_PTr-I_1250	Chr01	3438638	3441978	cluster2062;	3441232;	3441316;
hAT-5_PTr_1262	Chr01	3472922	3473116	cluster2080;	3472671;	3473161;
Helitron-N2_PTr_1263	Chr01	3473074	3474575	cluster2082;	3473686;	3473864;
Copia27-PTR_LTR_1322	Chr01	3633534	3633746	cluster2175;	3633471;	3634173;
Copia27-PTR_I-int_1323	Chr01	3633747	3637977	cluster2175;cluster2178;	3633471;3634972;	3634173;3635143;
EnSpm1B_PT_1365	Chr01	3727666	3728889	cluster2279;	3728827;	3728870;
L1-3_PTr_1377	Chr01	3766323	3767310	cluster2300;	3766916;	3766968;
hAT-3_PTr_1401	Chr01	3816345	3816525	cluster2334;	3816345;	3816754;
hAT-3_PTr_1402	Chr01	3816580	3816751	cluster2334;	3816345;	3816754;
Helitron-1_PTr_1403	Chr01	3816940	3817070	cluster2335;	3816971;	3817101;
Helitron-1_PTr_1420	Chr01	3904413	3904528	cluster2393;	3904300;	3904641;
hAT-6_PTr_1421	Chr01	3904770	3904906	cluster2394;	3904786;	3904929;
hAT-5_PTr_1491	Chr01	4129448	4129633	cluster2515;	4129366;	4129584;
Helitron-1_PTr_1577	Chr01	4360700	4360825	cluster2654;	4360723;	4360832;
hAT-5B_PTr_1587	Chr01	4401660	4401741	cluster2687;	4401637;	4401695;
Copia-3_PTri-I_1613	Chr01	4461634	4461846	cluster2721;	4461373;	4462022;
Copia-3_PTri-I_1614	Chr01	4461847	4462040	cluster2721;	4461373;	4462022;
SINE2-1_PTr_1646	Chr01	4510058	4510253	cluster2759;	4510066;	4510251;
Copia14-PTR_I-int_1656	Chr01	4540129	4544226	cluster2767;	4542434;	4542700;
SINE2-1_PTr_1662	Chr01	4563125	4563321	cluster2773;	4563179;	4563276;
Gypsy-73_PTr-LTR_1680	Chr01	4601979	4602526	cluster2805;	4602121;	4602409;
Copia42-PTR_LTR_1702	Chr01	4729768	4730165	cluster2871;	4729766;	4730124;
Helitron-N3_PTr_1722	Chr01	4783419	4783832	cluster2895;	4783495;	4783532;
Gypsy-73_PTr-LTR_1754	Chr01	4904424	4905402	cluster2958;	4904534;	4905063;
EnSpm1B_PT_1761	Chr01	4911758	4911846	cluster2969;	4911488;	4912483;
ENSPM1_PT_1762	Chr01	4911815	4912123	cluster2969;	4911488;	4912483;
Helitron-N2_PTr_1763	Chr01	4912124	4912639	cluster2969;	4911488;	4912483;
Copia-3_PTri-I_1768	Chr01	4918530	4918603	cluster2971;	4918543;	4918761;
Copia-3_PTri-I_1769	Chr01	4918604	4918772	cluster2971;	4918543;	4918761;
Ogre-PT2_I-int_1790	Chr01	4961555	4974218	cluster3001;	4965632;	4965897;
hAT-3_PTr_1817	Chr01	5020934	5021148	cluster3049;	5020929;	5021258;
hAT-3_PTr_1818	Chr01	5021058	5021200	cluster3049;	5020929;	5021258;
hAT-3_PTr_1819	Chr01	5021133	5021260	cluster3049;	5020929;	5021258;
Helitron-1_PTr_1824	Chr01	5054217	5054346	cluster3069;	5054135;	5054333;
Gypsy-71_PTr-LTR_1829	Chr01	5064269	5065340	cluster3076;	5064235;	5064634;
Helitron-N3_PTr_1861	Chr01	5152024	5152772	cluster3140;	5152463;	5152798;
Helitron-1_PTr_1921	Chr01	5308201	5309251	cluster3250;	5308253;	5308497;
Helitron-1_PTr_1968	Chr01	5399525	5399653	cluster3306;	5399541;	5399678;
hAT-5B_PTr_1999	Chr01	5470157	5470243	cluster3350;	5470119;	5470212;
Helitron-N4_PTr_2000	Chr01	5480489	5480714	cluster3356;	5480572;	5480707;
hAT-5_PTr_2009	Chr01	5498806	5498968	cluster3367;	5498820;	5498968;
SINE2-2_PTr_2014	Chr01	5513686	5513856	cluster3377;	5513709;	5513836;
Ogre-PT1_I-int_2032	Chr01	5557167	5557595	cluster3401;	5556601;	5558665;
Ogre-PT1_I-int_2033	Chr01	5557658	5558725	cluster3401;	5556601;	5558665;
Copia-92_PTr-I_2063	Chr01	5631465	5635509	cluster3428;	5631663;	5631841;
SINE2-1_PTr_2116	Chr01	5789902	5790098	cluster3526;	5789903;	5790077;
Helitron-1_PTr_2120	Chr01	5795856	5795996	cluster3528;	5795834;	5795949;
Helitron-1_PTr_2126	Chr01	5805247	5805367	cluster3534;	5805271;	5805387;
EnSpm1B_PT_2183	Chr01	5974297	5974671	cluster3619;	5974283;	5974414;
SINE2-2_PTr_2189	Chr01	6001779	6001953	cluster3631;	6001780;	6001951;
Ogre-PT1_LTR_2255	Chr01	6133882	6134334	cluster3710;	6133890;	6134337;
Gypsy-71_PTr-LTR_2278	Chr01	6184211	6184641	cluster3771;	6184294;	6184565;
Gypsy-71_PTr-LTR_2280	Chr01	6185728	6186270	cluster3773;	6185883;	6186114;
SINE2-1_PTr_2317	Chr01	6323478	6323654	cluster3853;	6323476;	6323651;
SINE2-1_PTr_2318	Chr01	6326375	6326530	cluster3854;	6326427;	6326533;
Helitron-1_PTr_2343	Chr01	6392637	6392777	cluster3884;	6392607;	6392796;
EnSpm1B_PT_2359	Chr01	6431819	6432392	cluster3910;	6431778;	6431977;
DNA-3-1_PTr_2442	Chr01	6690359	6691033	cluster4064;	6690452;	6690943;
SINE2-2_PTr_2449	Chr01	6709935	6710021	cluster4079;	6709928;	6710023;
Helitron-N3_PTr_2459	Chr01	6753740	6755266	cluster4105;	6754325;	6754637;
SINE2-1_PTr_2466	Chr01	6769282	6769477	cluster4120;	6769337;	6769476;
Helitron-1_PTr_2562	Chr01	6968880	6968994	cluster4270;	6968867;	6969027;
Helitron-1_PTr_2580	Chr01	7014922	7015061	cluster4303;	7014945;	7015104;
tRNA-Gln_OS_2588	Chr01	7055055	7055126	cluster4332;	7055036;	7055126;
Copia43-PTR_I-int_2601	Chr01	7098155	7098797	cluster4349;	7098492;	7098658;
hAT-1N_PTr_2614	Chr01	7116158	7116359	cluster4364;	7116158;	7116355;
Helitron-N3_PTr_2629	Chr01	7168214	7168604	cluster4405;	7168346;	7168591;
Gypsy-29_PTr-LTR_2707	Chr01	7365978	7366782	cluster4541;	7366350;	7366509;
DNA-3-2_PTr_2729	Chr01	7436025	7436868	cluster4585;	7436130;	7436276;
hAT-6_PTr_2734	Chr01	7456689	7456936	cluster4597;	7456723;	7457768;
hAT-6_PTr_2735	Chr01	7457642	7457766	cluster4597;	7456723;	7457768;
Helitron-N4_PTr_2739	Chr01	7466810	7467360	cluster4601;	7466856;	7466926;
Helitron-N4_PTr_2753	Chr01	7519042	7519174	cluster4631;	7518975;	7520307;
Helitron-N4_PTr_2754	Chr01	7519155	7519317	cluster4631;	7518975;	7520307;
hAT-3_PTr_2755	Chr01	7519336	7519483	cluster4631;	7518975;	7520307;
hAT-3_PTr_2756	Chr01	7519501	7519698	cluster4631;	7518975;	7520307;
Helitron-N4_PTr_2757	Chr01	7519699	7519854	cluster4631;	7518975;	7520307;
Helitron-N4_PTr_2758	Chr01	7519887	7519991	cluster4631;	7518975;	7520307;
Helitron-N4_PTr_2759	Chr01	7519977	7520120	cluster4631;	7518975;	7520307;
Helitron-N4_PTr_2760	Chr01	7520124	7520280	cluster4631;	7518975;	7520307;
Helitron-N3_PTr_2787	Chr01	7595616	7595941	cluster4667;	7595647;	7595749;
tRNA-Glu_OS_2805	Chr01	7651729	7651816	cluster4703;	7651732;	7651796;
Helitron-1_PTr_2855	Chr01	7757138	7757287	cluster4752;	7756995;	7757260;
Helitron-N3_PTr_2913	Chr01	7883771	7883846	cluster4832;	7883785;	7883897;
DNA-3-2B_PTr_2919	Chr01	7913339	7913817	cluster4863;	7913182;	7914284;
DNA-3-2B_PTr_2920	Chr01	7913819	7914285	cluster4863;	7913182;	7914284;
Helitron-N3_PTr_2946	Chr01	8013959	8014887	cluster4922;	8014163;	8014308;
Gypsy3-PTR_I-int_2993	Chr01	8141743	8141952	cluster5019;	8141656;	8141908;
Helitron-1_PTr_3007	Chr01	8236418	8236577	cluster5100;	8236422;	8236550;
SINE2-1_PTr_3018	Chr01	8261906	8262015	cluster5119;	8261908;	8262075;
Copia4-PTR_LTR_3039	Chr01	8319071	8319471	cluster5142;	8319162;	8319509;
DNA-3-1_PTr_3044	Chr01	8329480	8329668	cluster5152;	8329439;	8329570;
DNA-3-2B_PTr_3094	Chr01	8489999	8490188	cluster5221;	8489992;	8490167;
Helitron-N3_PTr_3122	Chr01	8576102	8576281	cluster5279;	8576112;	8576183;
Helitron-1_PTr_3141	Chr01	8636681	8636830	cluster5315;	8636711;	8636827;
PTr-3_3177	Chr01	8770622	8770817	cluster5376;	8770628;	8770817;
Helitron-N3_PTr_3201	Chr01	8835974	8835986	cluster5414;	8835965;	8836149;
Helitron-N3_PTr_3202	Chr01	8836026	8836281	cluster5414;	8835965;	8836149;
Copia-3_PTri-I_3206	Chr01	8841558	8841778	cluster5420;	8841458;	8841847;
Helitron-1_PTr_3216	Chr01	8870460	8870600	cluster5434;	8870460;	8870795;
SINE2-2_PTr_3217	Chr01	8870672	8870816	cluster5434;	8870460;	8870795;
Helitron-1_PTr_3246	Chr01	8955849	8955978	cluster5490;	8955745;	8955992;
Helitron-N4_PTr_3257	Chr01	8993269	8994243	cluster5509;	8993555;	8993761;
Copia-71_PT-I_3266	Chr01	9010263	9010829	cluster5519;	9010473;	9010598;
Copia-71_PT-I_3270	Chr01	9013182	9014712	cluster5526;	9014228;	9014737;
DNA-3-1_PTr_3329	Chr01	9149745	9150554	cluster5620;	9149819;	9149962;
hAT-6_PTr_3335	Chr01	9183586	9183709	cluster5636;	9183532;	9183676;
Helitron-N2_PTr_3418	Chr01	9393061	9393643	cluster5749;	9393207;	9393599;
Helitron-N4_PTr_3434	Chr01	9417053	9419346	cluster5759;cluster5762;	9417154;9418158;	9417216;9418343;
Copia-3_PTri-I_3463	Chr01	9481520	9481732	cluster5801;	9481557;	9481753;
Helitron-N3_PTr_3471	Chr01	9486784	9487929	cluster5808;	9487558;	9487599;
Helitron-N4_PTr_3477	Chr01	9494697	9495059	cluster5818;	9494748;	9494942;
hAT-5B_PTr_3479	Chr01	9502334	9502508	cluster5825;	9502331;	9502978;
Copia23-PTR_I-int_3525	Chr01	9592264	9593421	cluster5889;	9592493;	9592568;
Helitron-N2_PTr_3533	Chr01	9605359	9606588	cluster5899;	9606280;	9606353;
Helitron-1_PTr_3548	Chr01	9642324	9642443	cluster5925;	9642333;	9642405;
Helitron-N3_PTr_3584	Chr01	9740419	9741329	cluster5977;	9740422;	9740511;
Helitron-1_PTr_3619	Chr01	9798668	9798786	cluster6026;	9798650;	9798883;
DNA-3-1_PTr_3636	Chr01	9846970	9847769	cluster6044;	9846976;	9847748;
SINE2-2_PTr_3655	Chr01	9911189	9911361	cluster6083;	9911076;	9911419;
Copia-54_PTr-I_3665	Chr01	9936650	9939025	cluster6099;	9937620;	9938162;
SINE2-2_PTr_3667	Chr01	9940708	9940894	cluster6102;	9940743;	9940893;
hAT-2_PTr_3680	Chr01	10004305	10004556	cluster6143;	10004392;	10004703;
Gypsy-25_PTr-LTR_3681	Chr01	10004557	10004629	cluster6143;	10004392;	10004703;
Copia-3_PTri-I_3722	Chr01	10110490	10110636	cluster6217;	10110471;	10110563;
Copia-3_PTri-I_3723	Chr01	10110677	10110849	cluster6218;	10110686;	10110916;
Copia-3_PTri-I_3724	Chr01	10110850	10110917	cluster6218;	10110686;	10110916;
SINE2-1_PTr_3725	Chr01	10111663	10111807	cluster6219;	10111658;	10111796;
Helitron-N3_PTr_3726	Chr01	10113359	10114189	cluster6221;	10114133;	10114171;
SINE2-2_PTr_3734	Chr01	10128614	10128785	cluster6231;	10128616;	10128783;
DNA-3-1_PTr_3843	Chr01	10408474	10408834	cluster6349;	10408364;	10408918;
hAT-5_PTr_3876	Chr01	10520369	10520483	cluster6407;	10520366;	10520426;
Helitron-N2_PTr_3885	Chr01	10553652	10554013	cluster6424;	10553847;	10553904;
Helitron-N3_PTr_3931	Chr01	10708026	10708888	cluster6511;	10708088;	10708391;
Helitron-1_PTr_3936	Chr01	10712986	10713104	cluster6517;	10712970;	10713084;
Helitron-N2_PTr_3951	Chr01	10752636	10752899	cluster6540;	10752687;	10752802;
SINE2-1_PTr_3952	Chr01	10753864	10754028	cluster6541;	10753884;	10753987;
DNA-3-1_PTr_3986	Chr01	10864682	10865405	cluster6613;	10864956;	10865020;
Helitron-N3_PTr_4005	Chr01	10938860	10938948	cluster6660;	10938791;	10939105;
Helitron-N4_PTr_4043	Chr01	11055016	11055367	cluster6729;	11055108;	11055301;
SINE2-2_PTr_4060	Chr01	11121171	11121341	cluster6761;	11121175;	11121301;
Helitron-N3_PTr_4065	Chr01	11131695	11132939	cluster6771;	11132644;	11132682;
DNA-3-1_PTr_4083	Chr01	11202271	11203251	cluster6812;	11202126;	11203604;
SINE2-2_PTr_4086	Chr01	11204747	11204850	cluster6815;	11204749;	11204843;
Helitron-N4_PTr_4097	Chr01	11233381	11233497	cluster6830;	11233364;	11233912;
Helitron-N4_PTr_4098	Chr01	11233500	11233619	cluster6830;	11233364;	11233912;
Helitron-N4_PTr_4099	Chr01	11233612	11233782	cluster6830;	11233364;	11233912;
Helitron-N4_PTr_4100	Chr01	11233768	11233890	cluster6830;	11233364;	11233912;
Helitron-N3_PTr_4180	Chr01	11486203	11487069	cluster6981;	11486348;	11486379;
Copia-56_PTr-I_4214	Chr01	11557552	11558123	cluster7022;	11557771;	11557864;
POPGY2_LTR_4245	Chr01	11618031	11619457	cluster7046;	11618102;	11619592;
POPGY2_LTR_4246	Chr01	11619492	11619589	cluster7046;	11618102;	11619592;
Helitron-1_PTr_4336	Chr01	11816875	11816995	cluster7181;	11816858;	11816964;
Helitron-N4_PTr_4337	Chr01	11838006	11839614	cluster7192;cluster7193;	11838404;11838558;	11838442;11838612;
Helitron-1_PTr_4339	Chr01	11840716	11841491	cluster7197;	11841322;	11841550;
Helitron-N3_PTr_4352	Chr01	11882193	11882649	cluster7214;	11882404;	11882627;
Copia-78_PT-I_4363	Chr01	11915871	11917535	cluster7247;	11917118;	11917300;
hAT-7_PTr_4389	Chr01	11960557	11961119	cluster7275;	11960848;	11961010;
hAT-7_PTr_4390	Chr01	11961447	11961525	cluster7277;	11961377;	11961733;
hAT-7_PTr_4391	Chr01	11961537	11961730	cluster7277;	11961377;	11961733;
Helitron-N3_PTr_4402	Chr01	12011589	12011625	cluster7297;	12011409;	12011991;
hAT-3_PTr_4403	Chr01	12011626	12011804	cluster7297;	12011409;	12011991;
hAT-3_PTr_4404	Chr01	12011800	12011991	cluster7297;	12011409;	12011991;
Copia39-PTR_LTR_4425	Chr01	12090598	12090822	cluster7344;	12090638;	12090956;
Copia39-PTR_I-int_4426	Chr01	12090824	12093691	cluster7345;	12091080;	12091509;
EnSpm3_PT_4459	Chr01	12157328	12160632	cluster7398;cluster7399;	12157374;12158108;	12158006;12159990;
DNA-3-1_PTr_4469	Chr01	12191093	12191316	cluster7417;	12191094;	12191822;
DNA-3-2_PTr_4479	Chr01	12212928	12213395	cluster7434;	12212998;	12213396;
SINE2-1_PTr_4499	Chr01	12289702	12289847	cluster7500;	12289644;	12289847;
DNA-3-1_PTr_4502	Chr01	12293812	12294616	cluster7503;	12293835;	12294450;
Helitron-1_PTr_4541	Chr01	12422927	12423070	cluster7566;	12422843;	12423033;
Helitron-1_PTr_4589	Chr01	12526153	12526809	cluster7629;	12526326;	12526487;
Copia-68_PT-I_4604	Chr01	12584175	12584750	cluster7669;	12584221;	12584519;
Ogre-PT1_LTR_4648	Chr01	12688676	12689387	cluster7731;	12688668;	12689905;
Ogre-PT1_I-int_4649	Chr01	12689394	12696372	cluster7733;	12690251;	12690310;
Helitron-N1_PTr_4664	Chr01	12728930	12730575	cluster7764;	12729876;	12730474;
Helitron-N2_PTr_4685	Chr01	12763735	12765402	cluster7781;cluster7782;	12763833;12764248;	12764098;12765298;
Copia-3_PTri-I_4700	Chr01	12792995	12793072	cluster7804;	12792802;	12793278;
Copia-3_PTri-I_4701	Chr01	12793073	12793285	cluster7804;	12792802;	12793278;
Helitron-N3_PTr_4712	Chr01	12821746	12821839	cluster7827;	12821744;	12821777;
SINE2-1_PTr_4715	Chr01	12829045	12829234	cluster7835;	12829048;	12829228;
Helitron-N3_PTr_4763	Chr01	12953976	12954980	cluster7906;	12954795;	12954916;
Copia-91_PTr-LTR_4778	Chr01	12998790	13000491	cluster7939;	12999185;	12999280;
Helitron-1_PTr_4815	Chr01	13036971	13037127	cluster7960;	13036899;	13037107;
Copia-55_PTr-LTR_4847	Chr01	13088749	13089159	cluster7992;	13088809;	13089014;
Copia-91_PTr-LTR_4848	Chr01	13089906	13090889	cluster7994;	13089970;	13090105;
Helitron-N3_PTr_4885	Chr01	13143625	13144037	cluster8030;	13143749;	13143796;
Gypsy13-PTR_LTR_4914	Chr01	13202960	13205396	cluster8072;	13204202;	13205330;
SINE2-2_PTr_4937	Chr01	13281064	13281237	cluster8114;	13280937;	13281237;
Helitron-1_PTr_4945	Chr01	13307697	13308548	cluster8134;	13307713;	13308017;
Helitron-N3_PTr_4983	Chr01	13372847	13373339	cluster8189;	13372921;	13373197;
Helitron-N4_PTr_4990	Chr01	13379640	13379924	cluster8200;	13379818;	13379853;
Helitron-N3_PTr_5000	Chr01	13391503	13391848	cluster8206;	13391543;	13391634;
Helitron-N3_PTr_5026	Chr01	13464537	13464854	cluster8253;	13464622;	13464816;
Helitron-N4_PTr_5041	Chr01	13485226	13485583	cluster8266;	13485306;	13487116;
Helitron-N4_PTr_5042	Chr01	13485576	13485718	cluster8266;	13485306;	13487116;
Helitron-N4_PTr_5043	Chr01	13485711	13485826	cluster8266;	13485306;	13487116;
Helitron-N4_PTr_5044	Chr01	13485828	13485985	cluster8266;	13485306;	13487116;
Helitron-N4_PTr_5045	Chr01	13486009	13486165	cluster8266;	13485306;	13487116;
Helitron-N4_PTr_5046	Chr01	13486166	13486318	cluster8266;	13485306;	13487116;
Helitron-N4_PTr_5047	Chr01	13486340	13486529	cluster8266;	13485306;	13487116;
Helitron-N4_PTr_5048	Chr01	13486557	13486626	cluster8266;	13485306;	13487116;
Helitron-N4_PTr_5049	Chr01	13486638	13486727	cluster8266;	13485306;	13487116;
Helitron-N4_PTr_5050	Chr01	13486736	13486889	cluster8266;	13485306;	13487116;
Helitron-N4_PTr_5051	Chr01	13486893	13486957	cluster8266;	13485306;	13487116;
Helitron-N2_PTr_5054	Chr01	13489453	13490916	cluster8270;cluster8271;	13489583;13490458;	13490351;13490827;
Helitron-1_PTr_5055	Chr01	13492311	13492456	cluster8273;	13492349;	13492385;
Helitron-1_PTr_5066	Chr01	13522895	13522984	cluster8291;	13522757;	13522998;
Helitron-N4_PTr_5078	Chr01	13559366	13559948	cluster8310;	13559521;	13559723;
hAT-1_PTr_5091	Chr01	13571169	13571248	cluster8319;	13571180;	13571580;
Gypsy6-PTR_I-int_5106	Chr01	13589997	13590187	cluster8336;	13590073;	13590169;
Gypsy6-PTR_I-int_5107	Chr01	13590369	13590856	cluster8337;	13590570;	13590609;
Helitron-1_PTr_5147	Chr01	13667799	13667916	cluster8394;	13667799;	13667929;
DNA-3-2_PTr_5160	Chr01	13686552	13687213	cluster8402;	13686377;	13687298;
SINE2-1_PTr_5186	Chr01	13723663	13723834	cluster8429;	13723604;	13723801;
hAT-1N_PTr_5214	Chr01	13808276	13808437	cluster8516;	13808279;	13808636;
hAT-7_PTr_5215	Chr01	13808338	13808453	cluster8516;	13808279;	13808636;
hAT-3_PTr_5216	Chr01	13808477	13808652	cluster8516;	13808279;	13808636;
Helitron-1_PTr_5221	Chr01	13816298	13816376	cluster8526;	13816341;	13816388;
Gypsy7-PTR_I-int_5226	Chr01	13845140	13850553	cluster8547;	13847526;	13847569;
Copia47-PTR_I-int_5229	Chr01	13852345	13853007	cluster8553;	13852570;	13852725;
hAT-1N_PTr_5236	Chr01	13886957	13887142	cluster8586;	13886503;	13887144;
GYPOT1_LTR_5240	Chr01	13891355	13891962	cluster8589;	13891622;	13891681;
SINE2-1_PTr_5382	Chr01	14214742	14214802	cluster8809;	14214693;	14214921;
SINE2-2_PTr_5397	Chr01	14250390	14250451	cluster8834;	14250345;	14250504;
SINE2-1_PTr_5398	Chr01	14250452	14250506	cluster8834;	14250345;	14250504;
Caulimovirus-1_PTr_5463	Chr01	14342518	14344456	cluster8898;	14343418;	14343652;
Gypsy-73_PTr-LTR_5482	Chr01	14383562	14384368	cluster8940;	14383686;	14383760;
Helitron-1_PTr_5515	Chr01	14446860	14446973	cluster8991;	14446803;	14446985;
SINE2-1_PTr_5557	Chr01	14552477	14552665	cluster9060;	14552508;	14552663;
DNA-3-1_PTr_5580	Chr01	14597571	14597873	cluster9096;	14597721;	14597876;
hAT-1N_PTr_5581	Chr01	14598771	14599068	cluster9097;	14598769;	14598836;
ENSPM1_PT_5607	Chr01	14645056	14646720	cluster9119;	14645096;	14645232;
Gypsy-72_PTr-LTR_5608	Chr01	14646722	14649528	cluster9123;cluster9124;	14647609;14647796;	14647656;14648374;
Helitron-N3_PTr_5620	Chr01	14677677	14677945	cluster9137;	14677637;	14677788;
EnSpm3_PT_5622	Chr01	14682204	14689459	cluster9139;	14684782;	14687664;
DNA-3-1_PTr_5627	Chr01	14692476	14692717	cluster9143;	14692485;	14692593;
SINE2-1_PTr_5704	Chr01	14899556	14899752	cluster9260;	14899547;	14899733;
Helitron-N2_PTr_5708	Chr01	14905165	14906357	cluster9269;	14905906;	14906072;
Ogre-PT3_LTR_5731	Chr01	14945233	14946417	cluster9294;	14945216;	14946267;
POPGY1_I-int_5760	Chr01	14977328	14977704	cluster9328;	14977332;	14979208;
POPGY1_I-int_5761	Chr01	14977677	14978160	cluster9328;	14977332;	14979208;
POPGY1_I-int_5762	Chr01	14978160	14978414	cluster9328;	14977332;	14979208;
POPGY1_I-int_5763	Chr01	14978416	14979152	cluster9328;	14977332;	14979208;
hAT-4_PTr_5770	Chr01	14986228	14986450	cluster9335;	14986093;	14986567;
DNA-3-2B_PTr_5784	Chr01	15009598	15009831	cluster9342;	15009651;	15009820;
Gypsy13-PTR_LTR_5789	Chr01	15017619	15019325	cluster9347;	15018328;	15018610;
Ogre-PT2_I-int_5807	Chr01	15036139	15038768	cluster9371;	15036451;	15036518;
Gypsy-72_PTr-LTR_5814	Chr01	15047093	15050341	cluster9382;	15048017;	15049642;
EnSpm1B_PT_5815	Chr01	15054404	15057606	cluster9389;	15054988;	15055365;
EnSpm1B_PT_5816	Chr01	15057710	15058411	cluster9395;	15057950;	15058195;
Copia-54_PTr-LTR_5836	Chr01	15091774	15091854	cluster9418;	15091771;	15091843;
SINE2-1_PTr_5842	Chr01	15104899	15105093	cluster9437;	15104902;	15105080;
Helitron-N3_PTr_5846	Chr01	15118294	15118633	cluster9442;	15118498;	15118622;
SINE2-1_PTr_5861	Chr01	15149767	15149963	cluster9456;	15149777;	15149952;
Helitron-N4_PTr_5967	Chr01	15310086	15310748	cluster9576;	15310541;	15310643;
POPGY1_I-int_5988	Chr01	15334156	15334862	cluster9594;	15334663;	15334764;
tRNA-Ser_OS_6010	Chr01	15355060	15355144	cluster9617;	15355054;	15355142;
Copia-91_PTr-LTR_6100	Chr01	15521073	15522760	cluster9755;	15521134;	15521735;
SINE2-1_PTr_6106	Chr01	15547069	15547188	cluster9769;	15547070;	15547188;
hAT-6_PTr_6113	Chr01	15556780	15556941	cluster9774;	15556775;	15556843;
L1-5_PTr_6124	Chr01	15570048	15570170	cluster9784;	15570071;	15570190;
Copia47-PTR_I-int_6132	Chr01	15587552	15589646	cluster9800;	15587626;	15587678;
DNA-3-1_PTr_6180	Chr01	15666580	15666817	cluster9854;	15666583;	15666821;
Gypsy-79_PTr-LTR_6192	Chr01	15691060	15691891	cluster9879;	15691060;	15691545;
Caulimovirus-1_PTr_6205	Chr01	15704569	15709429	cluster9890;	15704595;	15708751;
Caulimovirus-1_PTr_6206	Chr01	15709515	15715988	cluster9893;	15711428;	15716003;
Gypsy-76_PTr-LTR_6207	Chr01	15717157	15717324	cluster9895;	15717251;	15717333;
Gypsy18-PTR_I-int_6226	Chr01	15764010	15765831	cluster9940;	15764009;	15764153;
Copia-3_PTri-I_6231	Chr01	15770586	15770680	cluster9946;	15770418;	15770681;
hAT-5B_PTr_6306	Chr01	15913311	15913457	cluster10059;	15912904;	15913459;
Copia-55_PTr-I_6322	Chr01	15969869	15971462	cluster10093;	15971285;	15971349;
SINE2-2_PTr_6345	Chr01	16019416	16019585	cluster10120;	16019362;	16019586;
EnSpm3_PT_6348	Chr01	16021530	16027007	cluster10124;	16026706;	16026845;
hAT-3_PTr_6373	Chr01	16094501	16094637	cluster10179;	16094504;	16094834;
hAT-3_PTr_6374	Chr01	16094600	16094642	cluster10179;	16094504;	16094834;
hAT-3_PTr_6375	Chr01	16094705	16094854	cluster10179;	16094504;	16094834;
Harbinger1_PTr_6392	Chr01	16127530	16131593	cluster10204;	16127599;	16129405;
Helitron-1_PTr_6474	Chr01	16284881	16285025	cluster10321;	16284824;	16285093;
Gypsy-25_PTr-LTR_6642	Chr01	16551695	16551754	cluster10501;	16551634;	16552096;
Gypsy-25_PTr-LTR_6643	Chr01	16551807	16552287	cluster10501;	16551634;	16552096;
Gypsy-25_PTr-LTR_6645	Chr01	16553354	16554334	cluster10505;	16554045;	16554422;
Gypsy-79_PTr-LTR_6656	Chr01	16569459	16569823	cluster10514;	16569674;	16569742;
SINE2-1_PTr_6657	Chr01	16570445	16570565	cluster10515;	16570471;	16570568;
Helitron-1_PTr_6664	Chr01	16578355	16579353	cluster10525;	16578860;	16579258;
Helitron-N3_PTr_6674	Chr01	16597761	16598513	cluster10530;	16597919;	16598279;
Copia-82_PT-I_6687	Chr01	16613145	16614756	cluster10541;	16614369;	16614448;
Copia-55_PTr-I_6715	Chr01	16646105	16646489	cluster10565;	16646209;	16646252;
Copia40-PTR_I-int_6744	Chr01	16712390	16713734	cluster10610;	16713505;	16713563;
ENSPM1_PT_6778	Chr01	16749292	16755288	cluster10634;	16752154;	16754281;
Helitron-1_PTr_6786	Chr01	16768947	16769114	cluster10647;	16768941;	16769175;
EnSpm2_PTr_6791	Chr01	16777688	16781171	cluster10661;cluster10662;	16779415;16779718;	16779463;16780080;
EnSpm2_PTr_6794	Chr01	16783782	16783919	cluster10666;	16783726;	16783930;
Gypsy-28_PTr-I_6826	Chr01	16809730	16810790	cluster10697;	16810099;	16810290;
Copia40-PTR_I-int_6845	Chr01	16837523	16839171	cluster10720;	16838557;	16838623;
Copia40-PTR_I-int_6846	Chr01	16839382	16840868	cluster10721;	16839546;	16839608;
Copia-65_PT-I_6848	Chr01	16841317	16841758	cluster10722;	16841572;	16841726;
Gypsy-29_PTr-LTR_6888	Chr01	16900823	16901512	cluster10781;	16900883;	16900940;
Gypsy-27_PTr-I_6989	Chr01	17049554	17051155	cluster10894;	17051006;	17051097;
Helitron-N4_PTr_6996	Chr01	17054861	17055190	cluster10898;	17054987;	17055035;
Gypsy-79_PTr-LTR_7021	Chr01	17102147	17103386	cluster10931;	17102796;	17103266;
Gypsy13-PTR_I-int_7022	Chr01	17103388	17103831	cluster10932;	17103417;	17103449;
Gypsy13-PTR_I-int_7025	Chr01	17104596	17105369	cluster10934;	17104952;	17105026;
POPGY2_LTR_7026	Chr01	17105374	17106850	cluster10936;	17106078;	17106847;
Gypsy13-PTR_I-int_7027	Chr01	17106853	17108690	cluster10939;cluster10940;	17108057;17108306;	17108198;17108427;
Gypsy-79_PTr-LTR_7032	Chr01	17110042	17110807	cluster10942;cluster10943;	17110131;17110291;	17110165;17110736;
Gypsy-71_PTr-LTR_7034	Chr01	17112965	17113325	cluster10946;	17113047;	17113283;
Gypsy-29_PTr-I_7035	Chr01	17113356	17114432	cluster10947;	17113725;	17113982;
Gypsy-71_PTr-LTR_7052	Chr01	17154724	17155678	cluster10961;	17154719;	17156289;
Gypsy-71_PTr-LTR_7053	Chr01	17156002	17156287	cluster10961;	17154719;	17156289;
ENSPM1_PT_7077	Chr01	17198972	17200608	cluster10999;	17200232;	17200267;
Gypsy-25_PTr-LTR_7086	Chr01	17218012	17218456	cluster11012;	17218045;	17218123;
Ogre-PT2_LTR_7087	Chr01	17218491	17219079	cluster11013;	17218404;	17219143;
Helitron-1_PTr_7094	Chr01	17233960	17234067	cluster11025;	17233975;	17234010;
Copia-55_PTr-LTR_7131	Chr01	17321682	17322450	cluster11072;	17321777;	17321997;
Gypsy4-PTR_I-int_7147	Chr01	17339032	17343724	cluster11094;	17340739;	17340802;
L1-1_PTr_7163	Chr01	17373821	17374266	cluster11117;	17373890;	17374073;
Copia-55_PTr-LTR_7180	Chr01	17409307	17410920	cluster11140;	17409546;	17410235;
Helitron-N2_PTr_7247	Chr01	17509639	17509762	cluster11226;	17509655;	17509767;
Gypsy-73_PTr-LTR_7282	Chr01	17567408	17568198	cluster11290;	17567334;	17567717;
Gypsy-78_PTr-I_7283	Chr01	17568763	17573194	cluster11293;	17568851;	17568904;
POPGY2_LTR_7413	Chr01	17750174	17750729	cluster11434;	17750173;	17751568;
POPGY2_LTR_7414	Chr01	17750713	17750766	cluster11434;	17750173;	17751568;
POPGY2_LTR_7415	Chr01	17750796	17751610	cluster11434;	17750173;	17751568;
Gypsy-72_PTr-LTR_7525	Chr01	17916514	17926961	cluster11584;	17921969;	17922029;
Gypsy-72_PTr-LTR_7544	Chr01	17958325	17967948	cluster11625;cluster11626;	17960678;17961080;	17960976;17961170;
Gypsy-72_PTr-LTR_7554	Chr01	17989551	17997291	cluster11674;	17991084;	17991725;
Gypsy-27_PTr-LTR_7638	Chr01	18132553	18132809	cluster11850;	18132505;	18133351;
Gypsy-28_PTr-LTR_7639	Chr01	18132810	18133171	cluster11850;	18132505;	18133351;
Gypsy-76_PTr-LTR_7640	Chr01	18133166	18133364	cluster11850;	18132505;	18133351;
Ogre-PT2_I-int_7662	Chr01	18159392	18165455	cluster11891;cluster11898;	18161721;18165191;	18161992;18165359;
Gypsy-27_PTr-I_7733	Chr01	18215801	18215875	cluster11951;	18215464;	18216440;
Gypsy-28_PTr-LTR_7769	Chr01	18252510	18252989	cluster11979;	18252512;	18253031;
Ogre-PT2_I-int_7776	Chr01	18260282	18261189	cluster11983;	18260880;	18260960;
Gypsy-27_PTr-LTR_7864	Chr01	18333824	18334041	cluster12050;	18333715;	18334411;
Gypsy-27_PTr-LTR_7865	Chr01	18334042	18334411	cluster12050;	18333715;	18334411;
Gypsy-25_PTr-I_7968	Chr01	18418644	18420812	cluster12142;	18420122;	18420155;
L1-1_PTr_7996	Chr01	18459791	18462193	cluster12192;	18459736;	18465627;
Gypsy10-PTR_I-int_7997	Chr01	18462192	18462454	cluster12192;	18459736;	18465627;
Gypsy10-PTR_LTR_7998	Chr01	18462455	18463392	cluster12192;	18459736;	18465627;
Gypsy-25_PTr-LTR_7999	Chr01	18463393	18465254	cluster12192;	18459736;	18465627;
Gypsy-25_PTr-LTR_8000	Chr01	18465248	18465722	cluster12192;	18459736;	18465627;
Gypsy-29_PTr-I_8030	Chr01	18500047	18502251	cluster12224;cluster12225;	18500913;18501185;	18500972;18501221;
Gypsy-29_PTr-I_8033	Chr01	18505866	18508759	cluster12237;cluster12238;	18506647;18507010;	18506722;18507044;
Gypsy-25_PTr-LTR_8039	Chr01	18512426	18514422	cluster12243;	18512309;	18515767;
Gypsy-25_PTr-LTR_8040	Chr01	18514416	18514848	cluster12243;	18512309;	18515767;
POPGY2_LTR_8041	Chr01	18514850	18515710	cluster12243;	18512309;	18515767;
Ogre-PT2_I-int_8060	Chr01	18538207	18541247	cluster12264;	18540040;	18540837;
Ogre-PT3_I-int_8074	Chr01	18559686	18562368	cluster12290;	18560445;	18560516;
Ogre-PT2_LTR_8077	Chr01	18564786	18565101	cluster12295;	18564867;	18564960;
Gypsy-72_PTr-LTR_8101	Chr01	18595404	18595606	cluster12343;	18595437;	18595575;
Gypsy18-PTR_I-int_8200	Chr01	18728175	18734448	cluster12445;	18731559;	18732014;
Gypsy-29_PTr-LTR_8218	Chr01	18763860	18764804	cluster12466;	18763792;	18764803;
Gypsy-73_PTr-LTR_8255	Chr01	18823106	18824608	cluster12510;	18823909;	18823987;
Copia43-PTR_I-int_8259	Chr01	18827559	18827935	cluster12518;	18827668;	18828196;
Gypsy-79_PTr-LTR_8260	Chr01	18827628	18828376	cluster12518;	18827668;	18828196;
Gypsy-29_PTr-I_8339	Chr01	18931946	18932295	cluster12601;	18932172;	18932203;
Gypsy-79_PTr-LTR_8373	Chr01	18973706	18976202	cluster12650;cluster12651;	18975267;18975608;	18975311;18976132;
Caulimovirus-1_PTr_8501	Chr01	19162821	19163041	cluster12817;	19162859;	19163736;
Caulimovirus-1_PTr_8502	Chr01	19163521	19163700	cluster12817;	19162859;	19163736;
Caulimovirus-1_PTr_8505	Chr01	19165752	19167448	cluster12819;	19166131;	19166234;
GYPOT1_LTR_8525	Chr01	19204853	19207131	cluster12851;	19205041;	19207043;
Gypsy18-PTR_I-int_8536	Chr01	19233690	19234852	cluster12871;	19234206;	19234655;
Gypsy-26_PTr-LTR_8607	Chr01	19357446	19358157	cluster12954;	19357748;	19358098;
Helitron-N3_PTr_8656	Chr01	19455263	19455278	cluster13020;	19455235;	19455529;
Helitron-N2_PTr_8657	Chr01	19455304	19455686	cluster13020;	19455235;	19455529;
Helitron-1_PTr_8745	Chr01	19580470	19580602	cluster13120;	19580504;	19580792;
Copia49-PTR_I-int_8752	Chr01	19595028	19595730	cluster13130;	19595647;	19595690;
SINE2-1_PTr_8794	Chr01	19642900	19643045	cluster13154;	19642902;	19643240;
Ogre-PT1_I-int_8836	Chr01	19704042	19705592	cluster13203;	19705299;	19705411;
Gypsy23-PTR_I-int_8852	Chr01	19729303	19731452	cluster13219;	19730984;	19731064;
hAT-7_PTr_8875	Chr01	19789178	19789366	cluster13263;	19789093;	19790388;
hAT-1N_PTr_8876	Chr01	19789879	19790180	cluster13263;	19789093;	19790388;
Gypsy-30_PTr-LTR_8877	Chr01	19790181	19790282	cluster13263;	19789093;	19790388;
Gypsy13-PTR_I-int_8900	Chr01	19812342	19812935	cluster13282;	19812783;	19812915;
EnSpm3_PT_8980	Chr01	19929557	19931921	cluster13366;	19930230;	19931345;
ENSPM1_PT_8986	Chr01	19939024	19939075	cluster13371;	19938924;	19943117;
ENSPM1_PT_8987	Chr01	19939073	19943114	cluster13371;	19938924;	19943117;
Copia-56_PTr-I_9051	Chr01	20030621	20032213	cluster13453;	20031192;	20031383;
Gypsy18-PTR_I-int_9053	Chr01	20034317	20036222	cluster13457;	20035080;	20035722;
Gypsy-72_PTr-LTR_9088	Chr01	20085469	20086966	cluster13495;cluster13496;	20085523;20086437;	20086331;20086924;
ENSPM1_PT_9099	Chr01	20108910	20109201	cluster13514;	20108579;	20110825;
ENSPM1_PT_9100	Chr01	20109255	20109426	cluster13514;	20108579;	20110825;
EnSpm1B_PT_9101	Chr01	20110022	20110144	cluster13514;	20108579;	20110825;
ENSPM1_PT_9102	Chr01	20110213	20110323	cluster13514;	20108579;	20110825;
L1-3_PTr_9103	Chr01	20110326	20110411	cluster13514;	20108579;	20110825;
Gypsy-72_PTr-LTR_9186	Chr01	20218233	20219572	cluster13580;	20219070;	20219530;
EnSpm3_PT_9301	Chr01	20389140	20392966	cluster13705;	20389530;	20397766;
EnSpm3_PT_9302	Chr01	20393006	20395671	cluster13705;	20389530;	20397766;
EnSpm3_PT_9303	Chr01	20395793	20398782	cluster13705;	20389530;	20397766;
Helitron-N1_PTr_9341	Chr01	20463256	20465032	cluster13749;	20463323;	20465067;
Gypsy-76_PTr-LTR_9370	Chr01	20532918	20534078	cluster13782;	20533465;	20533576;
Ogre-PT2_I-int_9400	Chr01	20611256	20611689	cluster13837;	20611325;	20611633;
hAT-3_PTr_9406	Chr01	20623711	20624103	cluster13849;	20623711;	20623898;
Copia42-PTR_I-int_9428	Chr01	20677665	20679156	cluster13877;	20678093;	20678216;
Gypsy-76_PTr-LTR_9446	Chr01	20695801	20696231	cluster13890;	20695796;	20695927;
DNA-3-2B_PTr_9454	Chr01	20709463	20709819	cluster13895;	20709482;	20709649;
Helitron-N3_PTr_9470	Chr01	20744128	20744377	cluster13926;	20744089;	20744427;
Copia47-PTR_I-int_9478	Chr01	20760951	20765164	cluster13948;	20764396;	20764659;
Helitron-1_PTr_9489	Chr01	20792254	20792374	cluster13975;	20792224;	20792433;
Copia-91_PTr-LTR_9522	Chr01	20853452	20854400	cluster14011;	20853420;	20854200;
Copia43-PTR_I-int_9598	Chr01	20996831	20997600	cluster14111;	20996942;	20997140;
Helitron-N3_PTr_9626	Chr01	21060354	21061071	cluster14159;	21060578;	21060641;
Copia-56_PTr-I_9637	Chr01	21102073	21106411	cluster14190;	21104923;	21105068;
Copia-56_PTr-LTR_9638	Chr01	21106412	21106562	cluster14193;	21106393;	21106508;
Gypsy18-PTR_LTR_9672	Chr01	21176651	21178270	cluster14232;	21177931;	21178257;
Helitron-1_PTr_9687	Chr01	21208037	21208178	cluster14251;	21207984;	21208191;
Ogre-PT3_I-int_9700	Chr01	21226333	21237944	cluster14265;	21228220;	21228265;
hAT-1N_PTr_9708	Chr01	21254626	21254898	cluster14289;	21254373;	21254836;
EnSpm3_PT_9751	Chr01	21317442	21317679	cluster14339;	21317512;	21317618;
Copia-56_PTr-I_9759	Chr01	21331954	21333623	cluster14354;	21333251;	21333411;
Helitron-N4_PTr_9779	Chr01	21366456	21366611	cluster14377;	21366480;	21366881;
Helitron-N4_PTr_9780	Chr01	21366618	21366790	cluster14377;	21366480;	21366881;
Helitron-N4_PTr_9781	Chr01	21366793	21366897	cluster14377;	21366480;	21366881;
Helitron-1_PTr_9791	Chr01	21396406	21396978	cluster14409;	21396694;	21396819;
Gypsy-74_PTr-LTR_9806	Chr01	21426078	21427011	cluster14432;	21426109;	21426301;
Ogre-PT1_I-int_9853	Chr01	21516784	21517099	cluster14502;	21516693;	21516992;
Helitron-N4_PTr_9878	Chr01	21534821	21535317	cluster14528;	21534993;	21535070;
L1-3_PTr_9880	Chr01	21538254	21539091	cluster14532;	21538335;	21538713;
Helitron-N3_PTr_9898	Chr01	21552500	21553546	cluster14552;	21552637;	21552698;
Helitron-N4_PTr_9900	Chr01	21555280	21555767	cluster14555;	21555517;	21555552;
Gypsy-79_PTr-LTR_9918	Chr01	21579341	21581615	cluster14574;	21581013;	21581551;
Helitron-1_PTr_9960	Chr01	21639668	21639790	cluster14624;	21639681;	21639785;
DNA-3-1_PTr_9961	Chr01	21641079	21641874	cluster14626;	21641084;	21641832;
L1-4_PTr_9985	Chr01	21743833	21747628	cluster14686;cluster14687;cluster14689;cluster14690;	21745310;21745533;21747107;21747387;	21745396;21745657;21747217;21747646;
Ogre-PT1_I-int_9991	Chr01	21754564	21755080	cluster14708;	21755012;	21755085;
DNA-3-1_PTr_10009	Chr01	21790839	21791621	cluster14726;	21790856;	21791622;
DNA-3-2B_PTr_10020	Chr01	21838788	21839158	cluster14758;	21838714;	21839168;
Helitron-N3_PTr_10023	Chr01	21844067	21845068	cluster14764;	21844154;	21844347;
L1-2_PTr_10044	Chr01	21912011	21917638	cluster14820;	21914244;	21914522;
Copia-3_PTri-I_10056	Chr01	21933802	21933883	cluster14844;	21933814;	21934566;
Gypsy-79_PTr-LTR_10057	Chr01	21933945	21934281	cluster14844;	21933814;	21934566;
Gypsy-79_PTr-LTR_10058	Chr01	21934283	21934469	cluster14844;	21933814;	21934566;
Ogre-PT2_I-int_10105	Chr01	21977910	21978481	cluster14872;	21978273;	21978412;
Ogre-PT1_I-int_10113	Chr01	21983977	21984246	cluster14878;	21983987;	21984091;
Gypsy-79_PTr-LTR_10118	Chr01	21988387	21989929	cluster14885;	21989233;	21990030;
Helitron-1_PTr_10121	Chr01	21999495	21999627	cluster14889;	21999513;	21999617;
EnSpm1B_PT_10173	Chr01	22094352	22095503	cluster14961;	22094654;	22094756;
ENSPM1_PT_10178	Chr01	22102849	22103271	cluster14975;	22103208;	22103306;
ENSPM1_PT_10259	Chr01	22196892	22200787	cluster15050;cluster15051;	22197443;22197891;	22197686;22197925;
Helitron-N3_PTr_10307	Chr01	22269631	22270817	cluster15097;	22270444;	22270687;
ENSPM1_PT_10318	Chr01	22286736	22287360	cluster15106;	22286734;	22287442;
EnSpm3_PT_10328	Chr01	22305085	22308381	cluster15114;	22305158;	22308369;
SINE2-2_PTr_10357	Chr01	22362567	22362729	cluster15150;	22362565;	22362710;
Helitron-1_PTr_10428	Chr01	22501782	22503362	cluster15256;	22502780;	22502984;
PTr-3_10429	Chr01	22504082	22504115	cluster15257;	22503962;	22504124;
Helitron-N1_PTr_10455	Chr01	22573651	22575931	cluster15293;	22574505;	22575924;
Caulimovirus-1_PTr_10460	Chr01	22590768	22595744	cluster15302;	22591664;	22591785;
Helitron-1_PTr_10465	Chr01	22608076	22608193	cluster15314;	22607864;	22608238;
hAT-1N_PTr_10467	Chr01	22608856	22609004	cluster15315;	22608792;	22609103;
hAT-3_PTr_10468	Chr01	22608975	22609167	cluster15315;	22608792;	22609103;
Gypsy-78_PTr-I_10577	Chr01	22736930	22737383	cluster15439;	22736976;	22737096;
Ogre-PT1_I-int_10602	Chr01	22764117	22765372	cluster15476;	22765042;	22765137;
EnSpm3_PT_10625	Chr01	22794355	22799531	cluster15503;	22796617;	22796947;
Gypsy5-PTR_I-int_10647	Chr01	22835194	22839604	cluster15528;	22835670;	22835754;
EnSpm3_PT_10684	Chr01	22871968	22872032	cluster15572;	22871633;	22872485;
EnSpm3_PT_10685	Chr01	22872132	22872296	cluster15572;	22871633;	22872485;
Gypsy-79_PTr-LTR_10686	Chr01	22872352	22872543	cluster15572;	22871633;	22872485;
Ogre-PT2_I-int_10711	Chr01	22892939	22904748	cluster15616;	22902484;	22902566;
hAT-5B_PTr_10740	Chr01	22928049	22928204	cluster15649;	22927409;	22928204;
Copia-71_PT-I_10755	Chr01	22941572	22941919	cluster15662;	22941675;	22941816;
Gypsy-71_PTr-LTR_10769	Chr01	22947765	22948448	cluster15671;	22948180;	22948285;
POPGY2_LTR_10794	Chr01	22980932	22981052	cluster15713;	22980982;	22981031;
SINE2-1_PTr_10827	Chr01	23079338	23079530	cluster15781;	23079364;	23079529;
POPGY2_LTR_10840	Chr01	23098095	23098177	cluster15795;	23098062;	23104092;
POPGY2_LTR_10841	Chr01	23098235	23099639	cluster15795;	23098062;	23104092;
POPGY1_I-int_10842	Chr01	23099638	23101570	cluster15795;	23098062;	23104092;
POPGY1_I-int_10843	Chr01	23101597	23105342	cluster15795;	23098062;	23104092;
POPGY1_I-int_10859	Chr01	23128460	23129699	cluster15816;	23129003;	23129361;
Gypsy-39_PT-I_10870	Chr01	23139858	23145991	cluster15826;cluster15828;	23143965;23145473;	23144136;23145600;
Copia19-PTR_I-int_10881	Chr01	23159525	23164080	cluster15848;	23161943;	23162128;
Gypsy-26_PTr-LTR_10915	Chr01	23200379	23201279	cluster15876;cluster15877;	23200491;23200828;	23200541;23201254;
Gypsy-79_PTr-LTR_10916	Chr01	23201383	23201564	cluster15878;	23201407;	23201492;
POPGY2_LTR_10921	Chr01	23204881	23205944	cluster15880;	23204905;	23205915;
Gypsy-79_PTr-LTR_10922	Chr01	23207412	23207614	cluster15883;	23207411;	23207984;
Ogre-PT3_LTR_10923	Chr01	23207640	23207833	cluster15883;	23207411;	23207984;
Ogre-PT3_LTR_10924	Chr01	23207858	23208044	cluster15883;	23207411;	23207984;
Gypsy-79_PTr-LTR_10960	Chr01	23243844	23244212	cluster15922;	23243923;	23244113;
Gypsy-79_PTr-LTR_10967	Chr01	23249420	23250444	cluster15931;	23249493;	23250143;
Gypsy-71_PTr-LTR_10984	Chr01	23259261	23259427	cluster15950;	23259254;	23259999;
Ogre-PT3_LTR_10985	Chr01	23259346	23260019	cluster15950;	23259254;	23259999;
EnSpm3_PT_10988	Chr01	23262986	23263126	cluster15952;	23263000;	23263280;
Gypsy-79_PTr-LTR_11016	Chr01	23289899	23291127	cluster15972;	23290284;	23290450;
Gypsy13-PTR_I-int_11018	Chr01	23291582	23293089	cluster15975;	23291876;	23292316;
Copia43-PTR_I-int_11057	Chr01	23324392	23325355	cluster16015;	23324653;	23325021;
Copia43-PTR_I-int_11063	Chr01	23328322	23337933	cluster16022;cluster16025;cluster16027;cluster16030;	23329640;23331790;23332415;23334127;	23330455;23331971;23332749;23334174;
Gypsy-79_PTr-LTR_11079	Chr01	23346328	23347006	cluster16050;	23346392;	23347060;
Copia-56_PTr-LTR_11091	Chr01	23360176	23360286	cluster16064;	23360170;	23361001;
Copia-56_PTr-I_11092	Chr01	23360288	23361662	cluster16064;	23360170;	23361001;
SINE2-1_PTr_11118	Chr01	23382899	23383093	cluster16086;	23382900;	23383080;
Copia43-PTR_I-int_11183	Chr01	23435048	23438146	cluster16150;	23435764;	23435893;
Copia-3_PTri-I_11215	Chr01	23455932	23456139	cluster16169;	23455851;	23456161;
SINE2-1_PTr_11249	Chr01	23486792	23486988	cluster16212;	23486798;	23486986;
POPGY2_LTR_11268	Chr01	23534357	23535307	cluster16248;	23534444;	23535987;
Gypsy-30_PTr-LTR_11269	Chr01	23535308	23536053	cluster16248;	23534444;	23535987;
Ogre-PT2_LTR_11287	Chr01	23560108	23562526	cluster16269;	23560144;	23560840;
Gypsy5-PTR_I-int_11295	Chr01	23569158	23570188	cluster16274;	23569280;	23569400;
Helitron-N3_PTr_11298	Chr01	23579477	23580353	cluster16278;	23579972;	23580155;
Copia5-PTR_I-int_11314	Chr01	23626042	23630661	cluster16303;cluster16309;	23627229;23629944;	23627363;23630890;
Copia5-PTR_LTR_11315	Chr01	23630669	23630978	cluster16309;	23629944;	23630890;
Copia-54_PTr-I_11363	Chr01	23690318	23694989	cluster16364;	23692203;	23693006;
Ogre-PT2_LTR_11391	Chr01	23740466	23743206	cluster16410;	23740478;	23741098;
Ogre-PT2_I-int_11392	Chr01	23743206	23754119	cluster16413;	23742294;	23744833;
Ogre-PT2_LTR_11394	Chr01	23755241	23757984	cluster16433;	23756581;	23756779;
Copia-56_PTr-LTR_11401	Chr01	23768811	23768967	cluster16447;	23768760;	23769002;
L1-2_PTr_11408	Chr01	23783723	23784881	cluster16454;	23783886;	23784386;
Gypsy-79_PTr-LTR_11425	Chr01	23807816	23808774	cluster16477;cluster16478;	23807739;23808730;	23808628;23808789;
Helitron-1_PTr_11453	Chr01	23846352	23846942	cluster16512;cluster16513;	23846417;23846600;	23846497;23846725;
EnSpm1B_PT_11461	Chr01	23869353	23869588	cluster16534;	23869501;	23869643;
Copia-54_PTr-LTR_11484	Chr01	23914028	23914192	cluster16560;	23914031;	23914180;
Gypsy-30_PTr-LTR_11510	Chr01	23940049	23940442	cluster16596;	23940111;	23940456;
Gypsy-71_PTr-LTR_11511	Chr01	23940306	23940481	cluster16596;	23940111;	23940456;
ENSPM1_PT_11527	Chr01	23961858	23964353	cluster16615;	23961853;	23962469;
DNA-3-2B_PTr_11533	Chr01	23966945	23966988	cluster16622;	23966905;	23967213;
Ogre-PT3_LTR_11534	Chr01	23967001	23967244	cluster16622;	23966905;	23967213;
EnSpm2_PTr_11686	Chr01	24243848	24244890	cluster16847;	24244073;	24245189;
Helitron-N1_PTr_11709	Chr01	24267528	24269221	cluster16870;	24267594;	24269215;
hAT-1_PTr_11712	Chr01	24273836	24273895	cluster16872;	24273786;	24274113;
Helitron-1_PTr_11713	Chr01	24273967	24274111	cluster16872;	24273786;	24274113;
DNA-3-1_PTr_11791	Chr01	24452902	24453128	cluster16984;	24452782;	24453061;
Helitron-1_PTr_11822	Chr01	24523002	24523153	cluster17030;	24523064;	24523187;
Copia-74_PT-I_11890	Chr01	24703022	24705329	cluster17158;	24703622;	24703731;
DNA-3-2B_PTr_11927	Chr01	24810667	24810908	cluster17219;	24809610;	24811277;
DNA-3-3_PTr_11928	Chr01	24811062	24811275	cluster17219;	24809610;	24811277;
Helitron-1_PTr_11947	Chr01	24874770	24874898	cluster17243;	24874784;	24874921;
Helitron-N3_PTr_11964	Chr01	24911881	24912460	cluster17278;	24912233;	24912335;
Copia-3_PTri-I_11974	Chr01	24953146	24953358	cluster17316;	24953147;	24953440;
Copia-3_PTri-I_11975	Chr01	24953359	24953436	cluster17316;	24953147;	24953440;
Copia-3_PTri-I_11976	Chr01	24956046	24956111	cluster17317;	24956044;	24956260;
hAT-7_PTr_11977	Chr01	24956112	24956381	cluster17317;	24956044;	24956260;
hAT-5_PTr_11981	Chr01	24957181	24957270	cluster17319;	24957178;	24957304;
Copia-3_PTri-I_11998	Chr01	24998141	24998352	cluster17361;	24998102;	24998325;
Copia-91_PTr-LTR_12067	Chr01	25143059	25143480	cluster17448;cluster17449;	25143137;25143279;	25143172;25143592;
DNA-3-1_PTr_12079	Chr01	25166260	25167095	cluster17472;	25166259;	25166496;
Helitron-1_PTr_12095	Chr01	25226058	25226190	cluster17505;	25226085;	25226272;
SINE2-2_PTr_12101	Chr01	25242402	25242572	cluster17513;	25242402;	25242567;
Helitron-N4_PTr_12108	Chr01	25253427	25253491	cluster17520;	25253268;	25254776;
Helitron-N4_PTr_12109	Chr01	25253495	25253650	cluster17520;	25253268;	25254776;
Helitron-N4_PTr_12110	Chr01	25253663	25253746	cluster17520;	25253268;	25254776;
Helitron-N4_PTr_12111	Chr01	25253858	25254049	cluster17520;	25253268;	25254776;
Helitron-N4_PTr_12112	Chr01	25254077	25254134	cluster17520;	25253268;	25254776;
Helitron-N4_PTr_12113	Chr01	25254131	25254286	cluster17520;	25253268;	25254776;
Helitron-N4_PTr_12114	Chr01	25254310	25254467	cluster17520;	25253268;	25254776;
Helitron-N4_PTr_12115	Chr01	25254470	25254605	cluster17520;	25253268;	25254776;
Helitron-N4_PTr_12116	Chr01	25254590	25254729	cluster17520;	25253268;	25254776;
Helitron-1_PTr_12119	Chr01	25256310	25256448	cluster17522;	25256342;	25256455;
hAT-3_PTr_12139	Chr01	25310542	25310714	cluster17583;	25310329;	25310897;
hAT-5B_PTr_12145	Chr01	25330633	25330779	cluster17598;	25330632;	25330890;
Helitron-N3_PTr_12157	Chr01	25356978	25358082	cluster17620;	25357683;	25357990;
Helitron-1_PTr_12167	Chr01	25386546	25386664	cluster17638;	25386492;	25386675;
Helitron-N3_PTr_12176	Chr01	25401986	25402052	cluster17648;	25402009;	25402055;
DNA-3-1_PTr_12214	Chr01	25451775	25451904	cluster17691;	25451724;	25452035;
GYPOT1_LTR_12228	Chr01	25500053	25502186	cluster17733;	25500019;	25502225;
Helitron-N2_PTr_12325	Chr01	25743082	25743389	cluster17879;	25743171;	25743262;
Helitron-N4_PTr_12357	Chr01	25805371	25805543	cluster17916;	25805360;	25805909;
Helitron-N4_PTr_12358	Chr01	25805530	25805657	cluster17916;	25805360;	25805909;
Helitron-N4_PTr_12359	Chr01	25805644	25805801	cluster17916;	25805360;	25805909;
SINE2-1_PTr_12368	Chr01	25826426	25826610	cluster17927;	25826424;	25826705;
Helitron-N3_PTr_12370	Chr01	25828273	25828389	cluster17928;	25828266;	25828512;
Copia-3_PTri-I_12381	Chr01	25844867	25844980	cluster17939;	25844886;	25845072;
SINE2-2_PTr_12382	Chr01	25844981	25845087	cluster17939;	25844886;	25845072;
Helitron-N3_PTr_12393	Chr01	25860786	25861909	cluster17957;	25861601;	25861847;
Copia-3_PTri-I_12443	Chr01	25994037	25994105	cluster18059;	25994031;	25994301;
Copia-55_PTr-LTR_12490	Chr01	26064742	26065726	cluster18119;	26065195;	26065373;
Copia-3_PTri-I_12491	Chr01	26066474	26066551	cluster18120;	26066475;	26066766;
Copia-3_PTri-I_12492	Chr01	26066552	26066771	cluster18120;	26066475;	26066766;
Helitron-N2_PTr_12552	Chr01	26205703	26206145	cluster18201;	26205820;	26205955;
DNA-3-1_PTr_12561	Chr01	26216335	26217150	cluster18212;	26216222;	26217094;
DNA-3-1_PTr_12563	Chr01	26224840	26225668	cluster18223;	26224782;	26225603;
Helitron-1_PTr_12578	Chr01	26264510	26264638	cluster18277;	26264490;	26264621;
hAT-6_PTr_12590	Chr01	26325943	26326067	cluster18329;	26325959;	26326044;
Helitron-N3_PTr_12625	Chr01	26407958	26408028	cluster18395;	26407745;	26408011;
Helitron-N3_PTr_12669	Chr01	26555212	26556183	cluster18484;	26555642;	26555839;
Helitron-N3_PTr_12741	Chr01	26748247	26748478	cluster18618;	26748288;	26748697;
EnSpm3_PT_12749	Chr01	26758066	26758370	cluster18628;	26758124;	26758198;
Gypsy-25_PTr-LTR_12757	Chr01	26772103	26772639	cluster18647;	26772095;	26772311;
Helitron-1_PTr_12760	Chr01	26775943	26776636	cluster18652;	26776534;	26776676;
Helitron-N4_PTr_12768	Chr01	26814817	26815463	cluster18681;	26815139;	26815300;
Copia-54_PTr-I_12777	Chr01	26846041	26850495	cluster18694;	26846041;	26850662;
Copia-54_PTr-LTR_12778	Chr01	26850496	26850660	cluster18694;	26846041;	26850662;
ENSPM1_PT_12779	Chr01	26851667	26852365	cluster18695;cluster18696;	26851835;26852186;	26851978;26852219;
Helitron-1_PTr_12805	Chr01	26885230	26885353	cluster18719;	26885006;	26885592;
Gypsy-30_PTr-LTR_12820	Chr01	26909795	26910407	cluster18743;	26909768;	26910631;
Gypsy-30_PTr-LTR_12821	Chr01	26910399	26910726	cluster18743;	26909768;	26910631;
Helitron-N3_PTr_12829	Chr01	26917228	26917460	cluster18747;	26917203;	26917347;
Caulimovirus-1_PTr_12835	Chr01	26923500	26923759	cluster18752;	26923536;	26924186;
Caulimovirus-1_PTr_12836	Chr01	26923756	26925114	cluster18752;	26923536;	26924186;
Caulimovirus-1_PTr_12838	Chr01	26925220	26926493	cluster18756;	26925623;	26925731;
Ogre-PT3_I-int_12852	Chr01	26944335	26946133	cluster18776;	26944581;	26944899;
Caulimovirus-1_PTr_12880	Chr01	26972622	26974133	cluster18796;	26972845;	26973205;
Copia19-PTR_I-int_12890	Chr01	26985897	26987179	cluster18812;	26986843;	26986950;
Copia22-PTR_I-int_12916	Chr01	27042241	27046770	cluster18864;	27045848;	27046113;
Copia-91_PTr-LTR_12919	Chr01	27048240	27048548	cluster18868;	27048298;	27049033;
Copia-91_PTr-LTR_12920	Chr01	27048549	27048795	cluster18868;	27048298;	27049033;
Copia-91_PTr-LTR_12921	Chr01	27048801	27049106	cluster18868;	27048298;	27049033;
Copia43-PTR_I-int_12940	Chr01	27075921	27076262	cluster18881;	27076009;	27076109;
Gypsy13-PTR_LTR_12941	Chr01	27075966	27076279	cluster18881;	27076009;	27076109;
Gypsy-76_PTr-LTR_12945	Chr01	27085387	27085533	cluster18889;	27085374;	27085737;
Gypsy-74_PTr-LTR_12946	Chr01	27085559	27085737	cluster18889;	27085374;	27085737;
Helitron-N1_PTr_12955	Chr01	27099815	27100058	cluster18905;	27099636;	27100251;
Helitron-N2_PTr_12956	Chr01	27100053	27100350	cluster18905;	27099636;	27100251;
Helitron-N3_PTr_12971	Chr01	27151615	27151828	cluster18944;	27151639;	27151749;
EnSpm2_PTr_12996	Chr01	27227669	27228011	cluster18990;	27227836;	27227983;
ENSPM1_PT_12998	Chr01	27230988	27231962	cluster18995;	27231507;	27231887;
hAT-3_PTr_13062	Chr01	27446931	27447095	cluster19158;	27446486;	27447302;
hAT-6_PTr_13078	Chr01	27501480	27501681	cluster19190;	27501609;	27501669;
Helitron-1_PTr_13102	Chr01	27553661	27554324	cluster19223;	27554093;	27554243;
Copia-3_PTri-I_13126	Chr01	27613566	27613778	cluster19267;	27613565;	27613804;
Copia43-PTR_I-int_13127	Chr01	27614958	27620038	cluster19269;cluster19270;	27615597;27616108;	27615996;27616227;
Copia-54_PTr-I_13151	Chr01	27664910	27667389	cluster19311;	27666791;	27667130;
EnSpm1B_PT_13258	Chr01	27801774	27803518	cluster19438;	27803027;	27803161;
Copia-64_PT-I_13301	Chr01	27854506	27856604	cluster19478;	27854728;	27854784;
Helitron-1_PTr_13307	Chr01	27884327	27884381	cluster19500;	27884293;	27884450;
Helitron-1_PTr_13312	Chr01	27897915	27898045	cluster19508;	27897933;	27898069;
Copia22-PTR_LTR_13380	Chr01	28116835	28117086	cluster19648;	28116990;	28117096;
Gypsy5-PTR_I-int_13400	Chr01	28212530	28216953	cluster19723;	28214753;	28215039;
Gypsy5-PTR_LTR_13401	Chr01	28216954	28217429	cluster19727;	28217272;	28217420;
Helitron-1_PTr_13410	Chr01	28244694	28244827	cluster19750;	28244688;	28244801;
Helitron-N3_PTr_13420	Chr01	28275638	28275943	cluster19763;	28275830;	28275861;
Copia34-PTR_I-int_13452	Chr01	28378340	28380401	cluster19834;	28379693;	28379815;
DNA-3-1_PTr_13457	Chr01	28393523	28394435	cluster19838;	28393533;	28394401;
hAT-6_PTr_13462	Chr01	28409387	28409436	cluster19845;	28409384;	28409463;
hAT-4_PTr_13477	Chr01	28451446	28451945	cluster19863;	28451613;	28451773;
ENSPM1_PT_13493	Chr01	28473691	28482660	cluster19885;	28473686;	28477588;
SINE2-2_PTr_13512	Chr01	28515493	28515633	cluster19912;	28515494;	28515633;
hAT-3_PTr_13558	Chr01	28621780	28622082	cluster20019;	28621745;	28622082;
DNA-3-2B_PTr_13580	Chr01	28691573	28691713	cluster20060;	28691578;	28692036;
Helitron-1_PTr_13581	Chr01	28691740	28691864	cluster20060;	28691578;	28692036;
SINE2-1_PTr_13609	Chr01	28759748	28759940	cluster20111;	28759753;	28759892;
Helitron-N4_PTr_13623	Chr01	28786395	28786472	cluster20126;	28786406;	28786756;
Gypsy-76_PTr-LTR_13627	Chr01	28807818	28809017	cluster20153;	28807842;	28807959;
Gypsy-27_PTr-I_13628	Chr01	28809543	28809668	cluster20156;	28809536;	28809807;
Copia-3_PTri-I_13642	Chr01	28865699	28865771	cluster20181;	28865719;	28865862;
Copia-3_PTri-I_13643	Chr01	28865772	28865897	cluster20181;	28865719;	28865862;
Helitron-1_PTr_13650	Chr01	28877990	28878093	cluster20193;	28878003;	28878097;
Caulimovirus-2_PTr_13707	Chr01	28968639	28975241	cluster20286;	28971468;	28971563;
Helitron-N3_PTr_13708	Chr01	28976263	28976538	cluster20295;	28976285;	28976353;
EnSpm3_PT_13738	Chr01	29011307	29014134	cluster20326;	29011936;	29014179;
EnSpm3_PT_13739	Chr01	29014132	29014180	cluster20326;	29011936;	29014179;
Helitron-N4_PTr_13851	Chr01	29224270	29225258	cluster20489;cluster20491;	29224424;29225012;	29224511;29225205;
DNA-3-2B_PTr_13853	Chr01	29226978	29227136	cluster20493;	29226996;	29227288;
Helitron-1_PTr_13854	Chr01	29227155	29227281	cluster20493;	29226996;	29227288;
hAT-5B_PTr_13925	Chr01	29423875	29423962	cluster20627;	29423864;	29423964;
hAT-6_PTr_13929	Chr01	29438583	29438869	cluster20637;	29438518;	29438867;
DNA-3-2B_PTr_13947	Chr01	29475057	29475254	cluster20663;	29475048;	29475542;
DNA-3-2_PTr_13948	Chr01	29475295	29475367	cluster20663;	29475048;	29475542;
DNA-3-2_PTr_13949	Chr01	29475368	29475511	cluster20663;	29475048;	29475542;
Copia22-PTR_I-int_13968	Chr01	29556964	29559084	cluster20735;	29558539;	29558571;
Helitron-N3_PTr_14046	Chr01	29661439	29662079	cluster20820;	29661793;	29661900;
ENSPM1_PT_14052	Chr01	29669350	29670013	cluster20835;	29669663;	29669855;
ENSPM1_PT_14054	Chr01	29670574	29674303	cluster20838;	29672623;	29672801;
EnSpm3_PT_14055	Chr01	29674367	29674964	cluster20840;	29674621;	29674806;
Copia-55_PTr-LTR_14142	Chr01	29752567	29753765	cluster20935;	29752983;	29753518;
SINE2-1_PTr_14147	Chr01	29760616	29760815	cluster20942;	29760679;	29760875;
Copia40-PTR_I-int_14158	Chr01	29799531	29803763	cluster20971;	29801466;	29801531;
tRNA-Pro_OS_14168	Chr01	29820709	29820780	cluster20986;	29820709;	29820904;
DNA-3-1_PTr_14188	Chr01	29855683	29855933	cluster21009;	29855769;	29855841;
SINE2-2_PTr_14223	Chr01	29954961	29955101	cluster21068;	29954968;	29955088;
Helitron-1_PTr_14230	Chr01	29983172	29983270	cluster21083;	29983209;	29983253;
Copia31-PTR_I-int_14244	Chr01	30009243	30013256	cluster21096;	30010552;	30010602;
Copia-54_PTr-I_14271	Chr01	30102433	30103083	cluster21137;	30102421;	30102613;
Copia-60_PT-I_14276	Chr01	30111217	30115390	cluster21147;	30113034;	30113067;
Gypsy-25_PTr-I_14282	Chr01	30155086	30155529	cluster21175;	30155270;	30155367;
Copia-91_PTr-LTR_14379	Chr01	30307634	30309065	cluster21293;	30308657;	30308856;
DNA-3-1_PTr_14420	Chr01	30383053	30383358	cluster21350;	30383096;	30383200;
Helitron-N3_PTr_14451	Chr01	30428411	30429297	cluster21393;	30428644;	30429062;
hAT-1_PTr_14474	Chr01	30521322	30521908	cluster21441;	30521374;	30521752;
Helitron-N2_PTr_14515	Chr01	30588630	30590093	cluster21495;	30589800;	30590009;
hAT-5_PTr_14517	Chr01	30595429	30595544	cluster21500;	30595219;	30595595;
hAT-5_PTr_14518	Chr01	30596256	30596541	cluster21502;	30596352;	30596604;
Copia36-PTR_I-int_14554	Chr01	30656838	30659348	cluster21547;	30658106;	30658232;
Copia-93_PTr-I_14564	Chr01	30673923	30674359	cluster21569;	30673313;	30675112;
Copia-93_PTr-I_14565	Chr01	30674499	30674601	cluster21569;	30673313;	30675112;
Copia-93_PTr-LTR_14566	Chr01	30674751	30675067	cluster21569;	30673313;	30675112;
hAT-3_PTr_14576	Chr01	30684287	30685127	cluster21580;	30683751;	30685117;
hAT-4_PTr_14608	Chr01	30734106	30734667	cluster21617;	30734258;	30735092;
hAT-4_PTr_14609	Chr01	30734654	30735071	cluster21617;	30734258;	30735092;
hAT-3_PTr_14618	Chr01	30750564	30750738	cluster21633;	30750400;	30750829;
hAT-7_PTr_14619	Chr01	30750735	30750839	cluster21633;	30750400;	30750829;
hAT-3_PTr_14620	Chr01	30750752	30750851	cluster21633;	30750400;	30750829;
Copia-92_PTr-I_14641	Chr01	30808746	30810205	cluster21681;	30809143;	30809373;
SINE2-1_PTr_14686	Chr01	30891038	30891230	cluster21752;	30890894;	30891383;
DNA-3-1_PTr_14690	Chr01	30893992	30894770	cluster21756;	30893967;	30894751;
Ogre-PT3_LTR_14801	Chr01	31065783	31067436	cluster21868;	31065777;	31066188;
Ogre-PT2_I-int_14806	Chr01	31069481	31075577	cluster21873;	31070823;	31071148;
Gypsy-71_PTr-LTR_14812	Chr01	31084366	31085028	cluster21889;	31084454;	31084681;
ENSPM1_PT_14817	Chr01	31091580	31093461	cluster21897;	31093302;	31093529;
EnSpm1B_PT_14820	Chr01	31095032	31097286	cluster21902;	31095808;	31095878;
Copia-3_PTri-I_14821	Chr01	31102406	31102618	cluster21909;	31102405;	31102697;
Copia-3_PTri-I_14822	Chr01	31102619	31102696	cluster21909;	31102405;	31102697;
Helitron-N3_PTr_14825	Chr01	31104477	31105250	cluster21912;	31104841;	31104974;
Gypsy18-PTR_LTR_14892	Chr01	31204042	31205690	cluster21992;	31204055;	31205681;
Gypsy-71_PTr-LTR_14894	Chr01	31206207	31206584	cluster21993;	31206273;	31206881;
ENSPM1_PT_14896	Chr01	31207200	31207901	cluster21994;	31207267;	31207317;
Helitron-N3_PTr_14927	Chr01	31261661	31261720	cluster22035;	31261626;	31261768;
Helitron-N3_PTr_14928	Chr01	31262188	31263246	cluster22036;	31262203;	31262837;
GYPOT1_LTR_14939	Chr01	31282645	31284285	cluster22051;	31283879;	31283918;
hAT-7_PTr_14940	Chr01	31284311	31284471	cluster22052;	31284208;	31284583;
EnSpm1B_PT_14943	Chr01	31290113	31291958	cluster22060;cluster22061;cluster22062;	31290567;31291096;31291485;	31290848;31291277;31291717;
ENSPM1_PT_14944	Chr01	31292195	31294637	cluster22064;	31292319;	31292585;
Helitron-1_PTr_14947	Chr01	31297079	31297595	cluster22070;	31297331;	31297460;
Helitron-1_PTr_14948	Chr01	31302529	31303371	cluster22075;cluster22076;	31303008;31303208;	31303107;31303475;
SINE2-2_PTr_14954	Chr01	31312226	31312283	cluster22087;	31312224;	31312274;
ENSPM1_PT_14976	Chr01	31343936	31344148	cluster22117;	31343968;	31344303;
hAT-3_PTr_15089	Chr01	31582906	31583088	cluster22283;	31582916;	31583257;
hAT-3_PTr_15090	Chr01	31583101	31583257	cluster22283;	31582916;	31583257;
Copia-54_PTr-LTR_15156	Chr01	31682529	31682696	cluster22347;	31682354;	31684198;
Copia-54_PTr-I_15157	Chr01	31682714	31686265	cluster22347;	31682354;	31684198;
EnSpm3_PT_15161	Chr01	31689793	31690382	cluster22353;	31689132;	31690376;
DNA-3-1_PTr_15189	Chr01	31777124	31777268	cluster22396;	31777168;	31777255;
Gypsy-26_PTr-LTR_15210	Chr01	31801021	31801101	cluster22411;	31800738;	31801716;
Copia46-PTR_I-int_15211	Chr01	31801102	31801711	cluster22411;	31800738;	31801716;
Copia-55_PTr-LTR_15213	Chr01	31803321	31803886	cluster22413;	31803378;	31803859;
Copia-55_PTr-I_15217	Chr01	31809569	31810836	cluster22417;	31810203;	31810247;
Gypsy-74_PTr-I_15229	Chr01	31829330	31829849	cluster22434;	31829565;	31829680;
Ogre-PT2_LTR_15241	Chr01	31844254	31846991	cluster22453;	31846092;	31846147;
Helitron-N3_PTr_15281	Chr01	31906276	31907188	cluster22504;	31906334;	31906464;
DNA-3-2B_PTr_15288	Chr01	31927300	31927455	cluster22517;	31927346;	31927589;
DNA-3-2_PTr_15289	Chr01	31927456	31927527	cluster22517;	31927346;	31927589;
DNA-3-3_PTr_15328	Chr01	32002540	32003359	cluster22567;	32002497;	32004063;
DNA-3-2_PTr_15329	Chr01	32003360	32004064	cluster22567;	32002497;	32004063;
DNA-3-1_PTr_15330	Chr01	32004217	32004504	cluster22568;	32004300;	32004452;
GYPOT1_LTR_15383	Chr01	32092494	32094490	cluster22631;	32093802;	32094880;
Helitron-N3_PTr_15465	Chr01	32367683	32368697	cluster22805;	32368110;	32368450;
ENSPM1_PT_15519	Chr01	32479117	32481392	cluster22892;	32480800;	32481075;
hAT-5B_PTr_15536	Chr01	32520914	32520994	cluster22917;	32520881;	32520982;
Helitron-N2_PTr_15538	Chr01	32522812	32523932	cluster22921;	32523606;	32523898;
Helitron-N4_PTr_15547	Chr01	32532037	32532234	cluster22930;	32532054;	32532518;
Helitron-N4_PTr_15548	Chr01	32532258	32532346	cluster22930;	32532054;	32532518;
Helitron-N4_PTr_15549	Chr01	32532330	32532478	cluster22930;	32532054;	32532518;
Helitron-N3_PTr_15550	Chr01	32532939	32533593	cluster22931;cluster22932;	32532880;32533342;	32533207;32533393;
Helitron-N3_PTr_15570	Chr01	32562122	32562756	cluster22956;	32562496;	32562631;
DNA-3-1_PTr_15572	Chr01	32564029	32564981	cluster22958;	32564025;	32564905;
Helitron-N3_PTr_15609	Chr01	32642054	32642674	cluster23006;	32642322;	32642435;
Helitron-1_PTr_15646	Chr01	32758744	32759639	cluster23065;	32758805;	32759014;
DNA-3-2B_PTr_15677	Chr01	32853399	32853889	cluster23109;	32853392;	32854429;
DNA-3-2B_PTr_15678	Chr01	32853890	32854020	cluster23109;	32853392;	32854429;
DNA-3-3_PTr_15679	Chr01	32854024	32854167	cluster23109;	32853392;	32854429;
SINE2-1_PTr_15696	Chr01	32903881	32904076	cluster23136;	32903924;	32904090;
Helitron-1_PTr_15705	Chr01	32937287	32938301	cluster23154;	32937649;	32938100;
SINE2-1_PTr_15711	Chr01	32945921	32946094	cluster23160;	32945938;	32946059;
SINE2-1_PTr_15729	Chr01	33001579	33001678	cluster23193;	33001559;	33001675;
Helitron-N4_PTr_15762	Chr01	33043631	33045138	cluster23218;	33043675;	33043831;
EnSpm1B_PT_15792	Chr01	33148152	33150997	cluster23313;	33148634;	33148781;
Gypsy-73_PTr-LTR_15813	Chr01	33177403	33178289	cluster23341;	33177519;	33177564;
EnSpm3_PT_15867	Chr01	33255993	33258769	cluster23398;	33256052;	33256751;
Helitron-N3_PTr_15883	Chr01	33319475	33320278	cluster23433;cluster23434;	33319553;33320093;	33319748;33320278;
DNA-3-1_PTr_15956	Chr01	33485800	33486757	cluster23546;	33485801;	33486760;
Helitron-2_PTr_15957	Chr01	33486654	33486779	cluster23546;	33485801;	33486760;
Helitron-N3_PTr_15973	Chr01	33525430	33525976	cluster23582;	33525830;	33526074;
DNA-3-1_PTr_15974	Chr01	33525956	33526153	cluster23582;	33525830;	33526074;
Helitron-1_PTr_15976	Chr01	33535346	33536265	cluster23585;	33536049;	33536311;
DNA-3-1_PTr_15981	Chr01	33539289	33539522	cluster23587;	33539406;	33539442;
Helitron-N3_PTr_15983	Chr01	33545349	33545836	cluster23594;	33545491;	33545682;
Gypsy18-PTR_LTR_16015	Chr01	33627617	33629238	cluster23642;	33628067;	33628376;
Copia47-PTR_I-int_16061	Chr01	33797209	33798175	cluster23751;	33797509;	33797706;
Helitron-1_PTr_16141	Chr01	33997005	33997151	cluster23875;	33996958;	33997164;
Helitron-N3_PTr_16155	Chr01	34032559	34033030	cluster23896;	34032592;	34032763;
Helitron-1_PTr_16157	Chr01	34041590	34041750	cluster23902;	34041531;	34041808;
hAT-5B_PTr_16167	Chr01	34073136	34073282	cluster23927;	34073197;	34073290;
Gypsy-74_PTr-LTR_16198	Chr01	34141209	34142194	cluster23980;	34141782;	34142051;
EnSpm1B_PT_16202	Chr01	34149988	34153315	cluster23986;	34151549;	34151707;
SINE2-2_PTr_16244	Chr01	34246663	34246743	cluster24044;	34246685;	34246722;
Gypsy-73_PTr-LTR_16248	Chr01	34251407	34251929	cluster24049;	34251611;	34251721;
Helitron-1_PTr_16266	Chr01	34263545	34263697	cluster24063;	34263570;	34263726;
Helitron-N3_PTr_16271	Chr01	34275415	34275655	cluster24076;	34275416;	34275464;
Copia22-PTR_LTR_16293	Chr01	34320306	34320791	cluster24100;	34320319;	34320535;
hAT-6_PTr_16306	Chr01	34342065	34344907	cluster24113;	34342439;	34343067;
ENSPM1_PT_16342	Chr01	34397581	34398434	cluster24146;	34398036;	34398230;
ENSPM1_PT_16350	Chr01	34402878	34405056	cluster24158;	34403646;	34403751;
Gypsy-78_PTr-LTR_16373	Chr01	34431322	34432225	cluster24191;	34431647;	34431876;
ENSPM1_PT_16425	Chr01	34487388	34488496	cluster24229;	34488455;	34488487;
hAT-3_PTr_16473	Chr01	34551896	34552063	cluster24280;	34551912;	34552207;
hAT-3_PTr_16474	Chr01	34552069	34552243	cluster24280;	34551912;	34552207;
DNA-3-1_PTr_16499	Chr01	34598700	34599678	cluster24309;	34598748;	34599680;
Helitron-1_PTr_16560	Chr01	34700118	34701052	cluster24353;cluster24354;	34700571;34700939;	34700655;34701003;
Helitron-1_PTr_16590	Chr01	34788130	34788528	cluster24409;	34787962;	34788415;
DNA-3-1_PTr_16595	Chr01	34800529	34801505	cluster24421;	34800530;	34801507;
Helitron-N3_PTr_16625	Chr01	34915749	34916551	cluster24503;	34915783;	34915948;
Gypsy-27_PTr-I_16694	Chr01	35107890	35111538	cluster24658;	35110478;	35110516;
Helitron-1_PTr_16734	Chr01	35179974	35180115	cluster24722;	35179975;	35180195;
Gypsy21-PTR_I-int_16737	Chr01	35200994	35201085	cluster24732;	35200839;	35201118;
Copia-91_PTr-LTR_16740	Chr01	35205000	35205911	cluster24733;	35205383;	35205603;
Copia-91_PTr-LTR_16741	Chr01	35205912	35206772	cluster24735;	35205990;	35206512;
Helitron-1_PTr_16800	Chr01	35317875	35317972	cluster24813;	35317918;	35317956;
SINE2-2_PTr_16845	Chr01	35422914	35423008	cluster24880;	35422810;	35423002;
Gypsy-79_PTr-LTR_16853	Chr01	35443714	35444436	cluster24893;	35443982;	35444176;
Helitron-N3_PTr_16857	Chr01	35459515	35459565	cluster24908;	35459209;	35459558;
hAT-6_PTr_16910	Chr01	35568432	35568557	cluster24980;	35568428;	35568587;
Helitron-N3_PTr_16922	Chr01	35592078	35592264	cluster24998;	35592151;	35592236;
Copia-91_PTr-LTR_16985	Chr01	35727691	35729361	cluster25092;	35729101;	35729208;
DNA-3-2_PTr_16986	Chr01	35730039	35730493	cluster25094;	35730203;	35730758;
DNA-3-3_PTr_16987	Chr01	35730491	35730758	cluster25094;	35730203;	35730758;
Helitron-N4_PTr_16991	Chr01	35734223	35734417	cluster25096;	35734018;	35735142;
Helitron-N1_PTr_16992	Chr01	35734498	35735212	cluster25096;	35734018;	35735142;
Helitron-1_PTr_16994	Chr01	35737500	35737634	cluster25101;	35737524;	35737680;
Copia-91_PTr-LTR_17022	Chr01	35802237	35802891	cluster25135;	35802301;	35802450;
Gypsy-74_PTr-LTR_17035	Chr01	35815340	35816012	cluster25150;	35815829;	35815876;
Gypsy-72_PTr-LTR_17059	Chr01	35847359	35847558	cluster25187;	35847405;	35847679;
Copia-91_PTr-LTR_17084	Chr01	35878860	35879863	cluster25206;	35879605;	35879794;
Copia-91_PTr-LTR_17086	Chr01	35883430	35883639	cluster25208;	35883499;	35883622;
DNA-3-1_PTr_17125	Chr01	35969688	35969816	cluster25280;	35969762;	35969799;
POPCOP1_I-int_17130	Chr01	35974336	35974546	cluster25283;	35974418;	35974463;
POPCOP1_I-int_17131	Chr01	35974537	35976178	cluster25286;	35975694;	35975828;
Copia11-PTR_I-int_17175	Chr01	36041164	36045277	cluster25349;	36043283;	36043334;
Helitron-N2_PTr_17181	Chr01	36070222	36071191	cluster25361;	36070278;	36070375;
POPCOP2_I-int_17184	Chr01	36071987	36077491	cluster25367;	36074945;	36075281;
SINE2-1_PTr_17197	Chr01	36116934	36117129	cluster25391;	36116946;	36117127;
GYPOT1_LTR_17214	Chr01	36181773	36181889	cluster25438;	36181480;	36184040;
GYPOT1_LTR_17215	Chr01	36182042	36182139	cluster25438;	36181480;	36184040;
GYPOT1_LTR_17216	Chr01	36182528	36183442	cluster25438;	36181480;	36184040;
Helitron-1_PTr_17242	Chr01	36252679	36253393	cluster25471;	36253051;	36253084;
Gypsy-29_PTr-LTR_17328	Chr01	36376012	36376799	cluster25560;	36376503;	36376720;
DNA-3-1_PTr_17358	Chr01	36413593	36413910	cluster25595;	36413497;	36413889;
SINE2-1_PTr_17418	Chr01	36566407	36566588	cluster25692;	36566412;	36566586;
Gypsy-27_PTr-LTR_17426	Chr01	36580849	36581018	cluster25696;	36580876;	36580985;
Copia22-PTR_I-int_17440	Chr01	36595910	36598977	cluster25708;cluster25710;	36596510;36597581;	36596869;36597699;
Copia-55_PTr-I_17447	Chr01	36607338	36608280	cluster25717;	36607803;	36607860;
EnSpm1B_PT_17448	Chr01	36608282	36609955	cluster25719;cluster25721;cluster25722;	36608513;36609057;36609439;	36608548;36609137;36609486;
hAT-7_PTr_17467	Chr01	36627687	36630756	cluster25739;cluster25741;	36627870;36629527;	36627932;36629776;
Copia-3_PTri-I_17470	Chr01	36633411	36633623	cluster25746;	36633405;	36633702;
Copia-3_PTri-I_17471	Chr01	36633624	36633702	cluster25746;	36633405;	36633702;
Gypsy-27_PTr-I_17493	Chr01	36689959	36690907	cluster25778;	36690855;	36690893;
Copia-91_PTr-LTR_17504	Chr01	36720858	36721494	cluster25791;	36721277;	36721340;
Helitron-N3_PTr_17533	Chr01	36787327	36788279	cluster25842;	36787726;	36787892;
DNA-3-1_PTr_17534	Chr01	36789085	36789990	cluster25844;	36789119;	36789918;
DNA-3-1_PTr_17537	Chr01	36805028	36805798	cluster25852;	36805024;	36805797;
Helitron-2_PTr_17538	Chr01	36805717	36805815	cluster25852;	36805024;	36805797;
Helitron-N3_PTr_17557	Chr01	36834426	36834628	cluster25875;	36834575;	36834629;
Copia-91_PTr-LTR_17584	Chr01	36895273	36896700	cluster25912;	36895300;	36895999;
Helitron-1_PTr_17585	Chr01	36901913	36902774	cluster25916;	36901840;	36902702;
hAT-5_PTr_17593	Chr01	36918636	36918735	cluster25925;	36918634;	36919022;
Copia-91_PTr-LTR_17594	Chr01	36919518	36921115	cluster25926;	36919894;	36919992;
Copia-91_PTr-LTR_17599	Chr01	36923311	36924985	cluster25927;	36924200;	36924331;
Helitron-N2_PTr_17602	Chr01	36928300	36928422	cluster25931;	36928345;	36928612;
SINE2-1_PTr_17603	Chr01	36928427	36928596	cluster25931;	36928345;	36928612;
Copia47-PTR_I-int_17604	Chr01	36934231	36934598	cluster25932;	36934225;	36934272;
Copia-3_PTri-I_17605	Chr01	36935972	36936185	cluster25933;	36935966;	36936373;
Copia-3_PTri-I_17606	Chr01	36936186	36936263	cluster25933;	36935966;	36936373;
Gypsy18-PTR_I-int_17629	Chr01	37014619	37016874	cluster25990;	37015883;	37015944;
DNA-3-2B_PTr_17655	Chr01	37082843	37083478	cluster26042;	37082838;	37083467;
Copia-91_PTr-LTR_17664	Chr01	37102825	37103210	cluster26054;	37102939;	37103116;
Gypsy18-PTR_I-int_17681	Chr01	37133063	37135834	cluster26072;	37135660;	37135709;
Gypsy18-PTR_I-int_17682	Chr01	37135817	37137759	cluster26073;	37135840;	37136041;
Copia11-PTR_I-int_17705	Chr01	37195540	37197243	cluster26111;	37195882;	37195974;
DNA-3-1_PTr_17707	Chr01	37210110	37210917	cluster26119;	37210127;	37210910;
Gypsy-76_PTr-LTR_17719	Chr01	37225896	37225993	cluster26128;	37225883;	37225984;
Gypsy-27_PTr-I_17721	Chr01	37226244	37227311	cluster26129;cluster26130;	37226496;37227199;	37226580;37227335;
EnSpm2_PTr_17744	Chr01	37261890	37262782	cluster26155;	37262288;	37262746;
EnSpm2_PTr_17747	Chr01	37264799	37266671	cluster26156;	37264846;	37264952;
DNA-3-1_PTr_17784	Chr01	37323995	37324676	cluster26211;cluster26212;	37324292;37324522;	37324413;37324678;
Copia-55_PTr-I_17797	Chr01	37351217	37352694	cluster26232;	37352330;	37352442;
Copia-91_PTr-LTR_17802	Chr01	37360422	37361764	cluster26238;	37360971;	37361094;
Gypsy-78_PTr-LTR_17808	Chr01	37379165	37381275	cluster26252;	37379225;	37379547;
Gypsy-78_PTr-I_17815	Chr01	37383453	37383644	cluster26255;	37383463;	37383564;
Copia19-PTR_I-int_17818	Chr01	37389602	37390372	cluster26257;	37389976;	37390114;
Copia-73_PT-I_17850	Chr01	37435102	37439319	cluster26289;	37438301;	37438583;
Gypsy-79_PTr-LTR_17914	Chr01	37537834	37537888	cluster26374;	37537778;	37537930;
Gypsy18-PTR_LTR_17937	Chr01	37560136	37560722	cluster26392;	37560332;	37560376;
ENSPM1_PT_17993	Chr01	37625772	37625847	cluster26448;	37625677;	37628259;
EnSpm3_PT_17994	Chr01	37625848	37625971	cluster26448;	37625677;	37628259;
ENSPM1_PT_17995	Chr01	37625972	37626104	cluster26448;	37625677;	37628259;
ENSPM1_PT_17996	Chr01	37626277	37628259	cluster26448;	37625677;	37628259;
Copia-56_PTr-I_18001	Chr01	37636127	37637553	cluster26454;	37637374;	37637506;
Ogre-PT2_I-int_18021	Chr01	37657430	37657690	cluster26473;	37657465;	37657569;
POPGY2_LTR_18059	Chr01	37761241	37762052	cluster26531;	37761146;	37770746;
ENSPM1_PT_18060	Chr01	37762053	37762558	cluster26531;	37761146;	37770746;
ENSPM1_PT_18061	Chr01	37762553	37767453	cluster26531;	37761146;	37770746;
POPGY2_LTR_18062	Chr01	37767457	37768191	cluster26531;	37761146;	37770746;
POPGY1_I-int_18063	Chr01	37768192	37768932	cluster26531;	37761146;	37770746;
POPGY1_I-int_18064	Chr01	37768947	37769190	cluster26531;	37761146;	37770746;
POPGY2_LTR_18065	Chr01	37769191	37769300	cluster26531;	37761146;	37770746;
POPGY2_LTR_18066	Chr01	37769340	37770741	cluster26531;	37761146;	37770746;
Gypsy-71_PTr-LTR_18091	Chr01	37789608	37789985	cluster26546;	37789651;	37789898;
Ogre-PT1_I-int_18101	Chr01	37806468	37816136	cluster26566;	37811594;	37811948;
Helitron-1_PTr_18142	Chr01	37861860	37862270	cluster26610;	37862112;	37862243;
DNA-3-1_PTr_18147	Chr01	37871873	37872048	cluster26621;	37871834;	37871965;
SINE2-1_PTr_18160	Chr01	37916577	37916702	cluster26659;	37916574;	37916700;
Helitron-1_PTr_18212	Chr01	38003935	38004662	cluster26715;	38004329;	38004447;
hAT-5B_PTr_18215	Chr01	38006008	38006174	cluster26717;	38006061;	38006751;
SINE2-2_PTr_18218	Chr01	38022427	38022604	cluster26726;	38022472;	38022567;
Ogre-PT2_LTR_18228	Chr01	38058119	38059800	cluster26762;	38058430;	38058748;
Copia22-PTR_I-int_18357	Chr01	38349694	38350294	cluster26932;	38349792;	38349894;
Copia-92_PTr-LTR_18379	Chr01	38407613	38407979	cluster26958;	38407611;	38407692;
Copia-91_PTr-LTR_18396	Chr01	38453638	38455044	cluster26995;	38454346;	38455014;
Copia-91_PTr-LTR_18398	Chr01	38456739	38456966	cluster26996;	38456796;	38456847;
Helitron-N3_PTr_18402	Chr01	38464998	38466240	cluster27009;	38465877;	38466098;
hAT-7_PTr_18451	Chr01	38590161	38590705	cluster27088;	38590330;	38590473;
SINE2-1_PTr_18458	Chr01	38601370	38601562	cluster27099;	38601375;	38601549;
Helitron-N3_PTr_18484	Chr01	38664587	38665354	cluster27146;	38665023;	38665075;
Copia-61_PT-I_18510	Chr01	38730147	38731232	cluster27196;	38730822;	38730920;
DNA-3-1_PTr_18528	Chr01	38802133	38802928	cluster27243;	38802133;	38802924;
PTr-3_18529	Chr01	38807583	38807742	cluster27245;	38807583;	38807775;
hAT-3_PTr_18530	Chr01	38808299	38808450	cluster27246;	38808300;	38808614;
hAT-7_PTr_18531	Chr01	38808363	38808496	cluster27246;	38808300;	38808614;
hAT-1N_PTr_18532	Chr01	38808461	38808631	cluster27246;	38808300;	38808614;
Helitron-N3_PTr_18541	Chr01	38842241	38842307	cluster27270;	38842068;	38842286;
hAT-4_PTr_18543	Chr01	38845163	38845591	cluster27273;	38845126;	38846120;
hAT-4_PTr_18544	Chr01	38845573	38846134	cluster27273;	38845126;	38846120;
Helitron-1_PTr_18558	Chr01	38874698	38874840	cluster27293;	38874718;	38874896;
Copia-91_PTr-LTR_18559	Chr01	38881591	38883149	cluster27295;cluster27297;	38881809;38882994;	38882040;38883058;
EnSpm1B_PT_18561	Chr01	38883679	38885201	cluster27299;	38883698;	38883846;
EnSpm3_PT_18562	Chr01	38885220	38885391	cluster27303;	38885081;	38885413;
hAT-3_PTr_18575	Chr01	38901094	38901326	cluster27318;	38901000;	38901271;
EnSpm1B_PT_18600	Chr01	38932745	38934444	cluster27360;	38933033;	38933118;
ENSPM1_PT_18638	Chr01	38990069	38990856	cluster27424;	38990203;	38990564;
ENSPM1_PT_18642	Chr01	38992807	38993004	cluster27426;	38992686;	38993490;
ENSPM1_PT_18667	Chr01	39028603	39030468	cluster27469;	39030270;	39030548;
POPGY2_LTR_18693	Chr01	39098664	39099277	cluster27516;	39098364;	39100715;
POPGY2_LTR_18694	Chr01	39099314	39100758	cluster27516;	39098364;	39100715;
Helitron-1_PTr_18729	Chr01	39163396	39163539	cluster27551;	39163446;	39163550;
Copia44-PTR_I-int_18732	Chr01	39167625	39171198	cluster27554;	39168462;	39168587;
ENSPM1_PT_18751	Chr01	39201733	39202666	cluster27573;	39201729;	39206435;
Gypsy18-PTR_LTR_18752	Chr01	39202667	39204279	cluster27573;	39201729;	39206435;
ENSPM1_PT_18753	Chr01	39204280	39212260	cluster27574;	39206563;	39212261;
Gypsy-73_PTr-LTR_18754	Chr01	39212918	39214786	cluster27576;cluster27577;	39212995;39213517;	39213373;39213814;
Gypsy-73_PTr-LTR_18755	Chr01	39214813	39215591	cluster27579;	39214215;	39215615;
Helitron-N3_PTr_18756	Chr01	39215851	39216774	cluster27580;	39216024;	39216195;
Gypsy-73_PTr-LTR_18767	Chr01	39258358	39258876	cluster27609;	39258584;	39258839;
Copia43-PTR_I-int_18768	Chr01	39258659	39258918	cluster27609;	39258584;	39258839;
Helitron-1_PTr_18775	Chr01	39269576	39269715	cluster27616;	39269600;	39269635;
Copia-91_PTr-LTR_18777	Chr01	39279406	39280887	cluster27622;cluster27624;	39279607;39280273;	39279676;39280868;
DNA-3-1_PTr_18787	Chr01	39298463	39299149	cluster27639;	39298466;	39298714;
Helitron-N3_PTr_18788	Chr01	39299526	39300470	cluster27641;	39299655;	39300277;
Copia-56_PTr-I_18805	Chr01	39328288	39328915	cluster27662;	39328342;	39328378;
Helitron-N4_PTr_18807	Chr01	39333308	39333384	cluster27668;	39333292;	39333351;
Copia-91_PTr-LTR_18864	Chr01	39444514	39445940	cluster27741;	39445622;	39445860;
Helitron-N3_PTr_18879	Chr01	39482380	39483493	cluster27765;	39483307;	39483384;
ENSPM1_PT_18900	Chr01	39517434	39520199	cluster27785;cluster27786;	39518033;39518852;	39518570;39519441;
POPGY2_LTR_18936	Chr01	39588886	39590484	cluster27836;	39588799;	39590462;
hAT-1_PTr_18937	Chr01	39590485	39591393	cluster27837;	39590726;	39590793;
Copia-91_PTr-LTR_18940	Chr01	39600348	39601367	cluster27846;	39600777;	39600900;
GYPOT1_LTR_18941	Chr01	39603954	39604576	cluster27850;	39604223;	39604745;
DNA-3-1_PTr_18951	Chr01	39627881	39628083	cluster27862;	39627734;	39628072;
hAT-5B_PTr_18954	Chr01	39645750	39645806	cluster27870;	39645663;	39646161;
SINE2-2_PTr_18968	Chr01	39720488	39720640	cluster27920;	39720380;	39720797;
Helitron-1_PTr_18969	Chr01	39720647	39720785	cluster27920;	39720380;	39720797;
EnSpm1B_PT_19043	Chr01	39863911	39864666	cluster28045;	39864215;	39864347;
ENSPM1_PT_19061	Chr01	39897832	39898994	cluster28079;	39898539;	39898880;
hAT-1N_PTr_19064	Chr01	39899922	39899994	cluster28081;	39899732;	39900398;
hAT-1N_PTr_19065	Chr01	39900020	39900081	cluster28081;	39899732;	39900398;
hAT-1N_PTr_19066	Chr01	39900148	39900316	cluster28081;	39899732;	39900398;
Helitron-1_PTr_19073	Chr01	39914392	39914492	cluster28095;	39914398;	39914472;
Gypsy-73_PTr-LTR_19096	Chr01	39999378	39999745	cluster28145;	39999591;	39999745;
Helitron-1_PTr_19105	Chr01	40059332	40059481	cluster28169;	40059259;	40059490;
Copia22-PTR_LTR_19109	Chr01	40074996	40075497	cluster28183;	40074999;	40075724;
Copia22-PTR_I-int_19110	Chr01	40075498	40078013	cluster28184;cluster28185;	40075841;40076235;	40076104;40076414;
ENSPM1_PT_19167	Chr01	40178726	40187635	cluster28284;	40178721;	40183684;
Ogre-PT2_I-int_19180	Chr01	40208260	40209390	cluster28299;	40209210;	40209475;
ENSPM1_PT_19189	Chr01	40218424	40221545	cluster28309;	40218472;	40220251;
Gypsy13-PTR_LTR_19206	Chr01	40237680	40238508	cluster28323;	40237423;	40238680;
ENSPM1_PT_19207	Chr01	40238509	40238570	cluster28323;	40237423;	40238680;
ENSPM1_PT_19208	Chr01	40238511	40238678	cluster28323;	40237423;	40238680;
Ogre-PT1_LTR_19277	Chr01	40360536	40360979	cluster28422;	40360908;	40360939;
SINE2-1_PTr_19409	Chr01	40493778	40493973	cluster28537;	40493804;	40493958;
DNA-3-1_PTr_19422	Chr01	40521254	40522070	cluster28561;	40521252;	40522129;
Copia-60_PT-I_19424	Chr01	40522591	40526710	cluster28564;cluster28567;	40523274;40525907;	40524041;40525978;
Ogre-PT1_I-int_19438	Chr01	40547751	40548645	cluster28582;	40547828;	40548377;
POPCOP1_I-int_19495	Chr01	40624197	40625443	cluster28635;	40624304;	40624382;
POPGY2_LTR_19531	Chr01	40654114	40654927	cluster28650;	40654156;	40655521;
POPGY1_LTR_19532	Chr01	40654129	40655126	cluster28650;	40654156;	40655521;
POPGY2_LTR_19533	Chr01	40654937	40655562	cluster28650;	40654156;	40655521;
Ogre-PT2_I-int_19565	Chr01	40700052	40712012	cluster28697;	40707675;	40707983;
Helitron-1_PTr_19593	Chr01	40760916	40761908	cluster28729;	40761160;	40761338;
Gypsy-79_PTr-LTR_19622	Chr01	40812710	40813580	cluster28768;	40813200;	40813627;
Ogre-PT3_LTR_19623	Chr01	40814204	40814833	cluster28770;	40814416;	40814578;
Gypsy-73_PTr-LTR_19681	Chr01	40944599	40947211	cluster28847;cluster28848;cluster28849;	40945312;40946007;40946279;	40945648;40946123;40947147;
Helitron-N1_PTr_19737	Chr01	41034608	41037555	cluster28906;	41034582;	41037383;
Helitron-N3_PTr_19742	Chr01	41048946	41049193	cluster28919;	41049142;	41049174;
DNA-3-1_PTr_19743	Chr01	41049154	41049477	cluster28919;	41049142;	41049174;
SINE2-1_PTr_19798	Chr01	41187872	41188025	cluster29020;	41187872;	41187979;
Helitron-N3_PTr_19889	Chr01	41337548	41338376	cluster29141;	41337814;	41337943;
DNA-3-1_PTr_19890	Chr01	41338340	41338508	cluster29142;	41338295;	41338781;
Gypsy-75_PTr-I_19895	Chr01	41342947	41343758	cluster29147;	41343247;	41343281;
POPGY1_I-int_19971	Chr01	41481480	41481615	cluster29246;	41480783;	41485260;
POPGY1_I-int_19972	Chr01	41481615	41482097	cluster29246;	41480783;	41485260;
POPGY1_I-int_19973	Chr01	41482071	41484325	cluster29246;	41480783;	41485260;
POPGY2_LTR_19974	Chr01	41484321	41485283	cluster29246;	41480783;	41485260;
DNA-3-1_PTr_19983	Chr01	41490907	41491631	cluster29255;	41490929;	41491536;
Ogre-PT1_I-int_19995	Chr01	41511469	41514154	cluster29275;	41513093;	41513255;
Copia22-PTR_I-int_20146	Chr01	41669409	41670195	cluster29386;	41669976;	41670118;
Helitron-N3_PTr_20199	Chr01	41759636	41760056	cluster29433;	41759669;	41759710;
Gypsy-76_PTr-LTR_20246	Chr01	41845205	41845369	cluster29496;	41845206;	41845686;
Gypsy-76_PTr-LTR_20247	Chr01	41845373	41845451	cluster29496;	41845206;	41845686;
DNA-3-3_PTr_20294	Chr01	41996912	41997309	cluster29596;	41996827;	41998404;
DNA-3-3_PTr_20295	Chr01	41997328	41997795	cluster29596;	41996827;	41998404;
Helitron-N2_PTr_20296	Chr01	41997796	41998605	cluster29596;	41996827;	41998404;
Helitron-N3_PTr_20309	Chr01	42025998	42026834	cluster29614;	42025970;	42026771;
ENSPM1_PT_20312	Chr01	42030570	42032171	cluster29623;	42031256;	42031624;
Gypsy-79_PTr-LTR_20317	Chr01	42045105	42045378	cluster29631;	42045216;	42045318;
Helitron-N2_PTr_20328	Chr01	42064247	42064313	cluster29640;	42064257;	42064410;
Helitron-N4_PTr_20371	Chr01	42154819	42155317	cluster29725;	42155082;	42155291;
hAT-3_PTr_20376	Chr01	42159541	42159636	cluster29729;	42159552;	42159646;
Helitron-N3_PTr_20395	Chr01	42209252	42209526	cluster29761;	42209208;	42209654;
DNA-3-1_PTr_20429	Chr01	42278132	42278930	cluster29815;	42278673;	42278986;
DNA-3-1_PTr_20492	Chr01	42417879	42418659	cluster29915;	42418096;	42418659;
Copia-69_PT-I_20514	Chr01	42447043	42449284	cluster29943;	42448265;	42448879;
Helitron-N2_PTr_20572	Chr01	42534607	42535374	cluster30007;	42534757;	42535194;
Copia-54_PTr-I_20595	Chr01	42571173	42575573	cluster30030;cluster30031;cluster30034;	42571910;42572389;42573607;	42572159;42572901;42573824;
Gypsy13-PTR_LTR_20663	Chr01	42690454	42693145	cluster30130;	42692430;	42693268;
Copia-56_PTr-LTR_20664	Chr01	42693152	42693278	cluster30130;	42692430;	42693268;
EnSpm2_PTr_20673	Chr01	42701091	42705412	cluster30140;	42702711;	42703484;
ENSPM1_PT_20691	Chr01	42729924	42732221	cluster30168;	42731127;	42731334;
hAT-2_PTr_20707	Chr01	42755007	42755930	cluster30185;	42755738;	42755971;
Helitron-1_PTr_20711	Chr01	42764705	42765419	cluster30188;	42764699;	42764815;
Helitron-N1_PTr_20712	Chr01	42767041	42769339	cluster30189;cluster30190;	42767079;42767243;	42767112;42769341;
Helitron-N1_PTr_20713	Chr01	42770003	42770053	cluster30191;	42770013;	42770167;
Helitron-N3_PTr_20714	Chr01	42770724	42772007	cluster30192;	42770922;	42770994;
Gypsy-76_PTr-LTR_20717	Chr01	42779081	42779275	cluster30199;	42778639;	42779277;
hAT-2_PTr_20729	Chr01	42795598	42798396	cluster30217;	42795950;	42796019;
Helitron-N3_PTr_20758	Chr01	42836022	42836780	cluster30254;	42836188;	42836324;
Copia7-PTR_I-int_20765	Chr01	42846386	42847519	cluster30262;	42846711;	42846945;
Helitron-N1_PTr_20783	Chr01	42875176	42875216	cluster30285;	42875188;	42875352;
Helitron-N1_PTr_20784	Chr01	42875281	42875365	cluster30285;	42875188;	42875352;
hAT-1N_PTr_20833	Chr01	42994711	42994863	cluster30361;	42994580;	42994940;
SINE2-1_PTr_20875	Chr01	43091999	43092194	cluster30439;	43091988;	43092182;
Gypsy13-PTR_I-int_20905	Chr01	43116475	43116814	cluster30465;	43116215;	43116934;
SINE2-1_PTr_20933	Chr01	43175894	43176090	cluster30513;	43175909;	43176089;
Copia-81_PT-I_20950	Chr01	43216012	43220023	cluster30544;cluster30545;	43218557;43218862;	43218732;43219925;
GYPOT1_LTR_20968	Chr01	43251090	43253242	cluster30569;	43251084;	43256078;
hAT-5B_PTr_20999	Chr01	43341906	43341965	cluster30613;	43341876;	43341953;
SINE2-2_PTr_21000	Chr01	43346872	43346945	cluster30614;	43346890;	43346923;
Helitron-1_PTr_21002	Chr01	43348173	43348493	cluster30617;	43348309;	43348548;
DNA-3-1_PTr_21011	Chr01	43363369	43364320	cluster30624;cluster30625;	43363366;43364087;	43363981;43364310;
Helitron-1_PTr_21053	Chr01	43452598	43453663	cluster30675;	43452915;	43453343;
Copia-54_PTr-I_21054	Chr01	43455903	43460314	cluster30677;	43456045;	43457936;
Gypsy-78_PTr-LTR_21104	Chr01	43527855	43528091	cluster30745;	43527216;	43528467;
Ogre-PT1_I-int_21108	Chr01	43534965	43535760	cluster30751;	43535017;	43536525;
Ogre-PT2_I-int_21109	Chr01	43535768	43535968	cluster30751;	43535017;	43536525;
Ogre-PT2_I-int_21110	Chr01	43536173	43536245	cluster30751;	43535017;	43536525;
Gypsy-26_PTr-LTR_21111	Chr01	43536245	43536309	cluster30751;	43535017;	43536525;
hAT-1_PTr_21126	Chr01	43551896	43551975	cluster30770;	43551918;	43552329;
hAT-1_PTr_21127	Chr01	43552182	43552401	cluster30770;	43551918;	43552329;
Ogre-PT3_LTR_21138	Chr01	43569381	43569685	cluster30788;	43569372;	43569758;
Ogre-PT3_I-int_21160	Chr01	43592551	43593299	cluster30824;	43592958;	43593097;
SINE2-2_PTr_21210	Chr01	43686257	43686436	cluster30897;	43686193;	43686416;
Gypsy-71_PTr-LTR_21229	Chr01	43731508	43731934	cluster30929;	43731782;	43731957;
Gypsy13-PTR_I-int_21249	Chr01	43785608	43786250	cluster30974;	43786025;	43786172;
GYPOT1_LTR_21274	Chr01	43853010	43853114	cluster31018;	43852864;	43853142;
Gypsy-26_PTr-LTR_21288	Chr01	43875975	43876551	cluster31037;	43876008;	43876151;
Helitron-N3_PTr_21331	Chr01	43923024	43923284	cluster31079;	43923141;	43923225;
hAT-3_PTr_21340	Chr01	43947538	43947688	cluster31092;	43947558;	43947685;
DNA-3-3_PTr_21341	Chr01	43952530	43952909	cluster31094;	43952537;	43953805;
DNA-3-2_PTr_21342	Chr01	43952919	43953016	cluster31094;	43952537;	43953805;
ENSPM1_PT_21345	Chr01	43960317	43960670	cluster31097;	43960320;	43960773;
ENSPM1_PT_21346	Chr01	43960519	43960688	cluster31097;	43960320;	43960773;
Copia48-PTR_I-int_21350	Chr01	43964039	43965579	cluster31100;	43964368;	43965108;
hAT-3_PTr_21380	Chr01	44016448	44016544	cluster31133;	44016385;	44016612;
hAT-3_PTr_21381	Chr01	44016489	44016655	cluster31133;	44016385;	44016612;
Gypsy13-PTR_I-int_21409	Chr01	44062521	44070810	cluster31168;cluster31169;cluster31170;cluster31176;	44064273;44064840;44065432;44069150;	44064317;44065070;44065492;44069459;
Helitron-N2_PTr_21436	Chr01	44177336	44177897	cluster31243;	44177560;	44177755;
Helitron-N4_PTr_21467	Chr01	44209390	44209484	cluster31259;	44209384;	44209915;
Helitron-N4_PTr_21468	Chr01	44209513	44209667	cluster31259;	44209384;	44209915;
Helitron-N4_PTr_21469	Chr01	44209673	44209735	cluster31259;	44209384;	44209915;
hAT-3_PTr_21480	Chr01	44230924	44231134	cluster31273;	44230925;	44231388;
hAT-3_PTr_21481	Chr01	44231224	44231400	cluster31273;	44230925;	44231388;
Helitron-N4_PTr_21483	Chr01	44237949	44238118	cluster31277;	44237940;	44237983;
EnSpm1B_PT_21504	Chr01	44291900	44294285	cluster31310;	44292706;	44292761;
ENSPM1_PT_21508	Chr01	44305256	44306074	cluster31321;	44305095;	44305546;
hAT-5B_PTr_21511	Chr01	44312407	44312566	cluster31326;	44312407;	44313119;
Helitron-1_PTr_21534	Chr01	44378204	44379016	cluster31371;	44378216;	44378310;
EnSpm1B_PT_21586	Chr01	44456815	44457399	cluster31420;	44456990;	44457088;
Gypsy-79_PTr-LTR_21626	Chr01	44516245	44518804	cluster31481;cluster31485;	44516295;44518111;	44516777;44518144;
hAT-3_PTr_21628	Chr01	44519400	44519618	cluster31487;	44519400;	44520446;
hAT-3_PTr_21629	Chr01	44520289	44520457	cluster31487;	44519400;	44520446;
SINE2-2_PTr_21630	Chr01	44522203	44522382	cluster31489;	44522203;	44522362;
Copia-91_PTr-LTR_21632	Chr01	44528612	44528663	cluster31500;	44528433;	44529117;
Copia-91_PTr-LTR_21633	Chr01	44528669	44529664	cluster31500;	44528433;	44529117;
Gypsy-29_PTr-LTR_21649	Chr01	44536672	44537623	cluster31511;	44537223;	44537882;
hAT-5_PTr_21673	Chr01	44589782	44589922	cluster31544;	44589760;	44590017;
EnSpm1B_PT_21678	Chr01	44594358	44594441	cluster31551;	44594362;	44595035;
ENSPM1_PT_21679	Chr01	44594451	44595411	cluster31551;	44594362;	44595035;
DNA-3-1_PTr_21792	Chr01	44826824	44827808	cluster31734;	44826836;	44827810;
POPCOP2_I-int_21812	Chr01	44940177	44941590	cluster31793;	44940158;	44940307;
Gypsy23-PTR_I-int_21830	Chr01	44986975	44987868	cluster31822;	44987271;	44987379;
Gypsy-79_PTr-LTR_21843	Chr01	45001261	45001380	cluster31833;	45001282;	45001353;
ENSPM1_PT_21856	Chr01	45030454	45031543	cluster31861;	45030482;	45030557;
Ogre-PT2_I-int_21862	Chr01	45036265	45036306	cluster31864;	45035971;	45036606;
Ogre-PT2_I-int_21867	Chr01	45039037	45041647	cluster31871;	45040412;	45040682;
Ogre-PT2_I-int_21930	Chr01	45145457	45157557	cluster31966;	45155702;	45155830;
EnSpm3_PT_21941	Chr01	45201811	45202911	cluster32003;	45201971;	45202678;
Copia-19_PTri-I_21973	Chr01	45250097	45250700	cluster32056;	45250167;	45250276;
Gypsy13-PTR_I-int_22007	Chr01	45306277	45308341	cluster32114;	45307703;	45308266;
Ogre-PT2_LTR_22054	Chr01	45360493	45363301	cluster32151;	45362191;	45362263;
Ogre-PT2_LTR_22076	Chr01	45405640	45408360	cluster32176;	45407011;	45407157;
Ogre-PT2_I-int_22078	Chr01	45409997	45410477	cluster32179;	45410170;	45410253;
Ogre-PT3_I-int_22088	Chr01	45425755	45434802	cluster32187;	45426797;	45427304;
Ogre-PT3_LTR_22091	Chr01	45437298	45437897	cluster32204;	45436839;	45437791;
Ogre-PT2_I-int_22094	Chr01	45440910	45442301	cluster32207;	45441178;	45441556;
Ogre-PT2_I-int_22096	Chr01	45443159	45451053	cluster32214;cluster32221;	45445108;45448561;	45445519;45448651;
EnSpm3_PT_22109	Chr01	45464952	45467307	cluster32238;	45464580;	45467313;
Gypsy-79_PTr-LTR_22128	Chr01	45486752	45487387	cluster32256;	45486933;	45487405;
Gypsy-71_PTr-LTR_22129	Chr01	45487071	45487576	cluster32256;	45486933;	45487405;
L1-4_PTr_22159	Chr01	45516678	45520498	cluster32285;	45518956;	45519093;
Gypsy-26_PTr-LTR_22194	Chr01	45586585	45586830	cluster32346;	45586653;	45587606;
Gypsy-26_PTr-LTR_22195	Chr01	45586898	45587708	cluster32346;	45586653;	45587606;
Ogre-PT1_I-int_22201	Chr01	45592656	45593029	cluster32353;	45592638;	45592763;
ENSPM1_PT_22205	Chr01	45607278	45610832	cluster32371;	45607284;	45613251;
ENSPM1_PT_22206	Chr01	45610825	45613210	cluster32371;	45607284;	45613251;
Gypsy16-PTR_I-int_22242	Chr01	45667539	45671915	cluster32423;	45671282;	45671368;
Ogre-PT2_I-int_22253	Chr01	45682383	45685875	cluster32436;cluster32437;	45682584;45682922;	45682814;45683249;
Ogre-PT2_I-int_22267	Chr01	45698768	45703967	cluster32463;	45702911;	45703048;
L1-2_PTr_22299	Chr01	45735302	45741486	cluster32494;	45738799;	45739764;
DNA-3-3_PTr_22304	Chr01	45758842	45758881	cluster32511;	45758819;	45758975;
DNA-3-2_PTr_22305	Chr01	45758897	45758977	cluster32511;	45758819;	45758975;
Helitron-1_PTr_22306	Chr01	45759219	45759342	cluster32512;	45759193;	45759376;
Copia22-PTR_LTR_22347	Chr01	45827777	45828187	cluster32584;	45826264;	45828986;
Gypsy-30_PTr-LTR_22383	Chr01	45895409	45896252	cluster32645;	45896105;	45896201;
GYPOT1_LTR_22410	Chr01	45958374	45958937	cluster32692;	45958265;	45958745;
Gypsy-79_PTr-LTR_22430	Chr01	45997207	45997747	cluster32731;	45997264;	45997701;
EnSpm3_PT_22432	Chr01	45998914	46002547	cluster32733;	46002081;	46002592;
ENSPM1_PT_22441	Chr01	46026946	46028798	cluster32761;	46028583;	46028625;
Helitron-N4_PTr_22455	Chr01	46054798	46055410	cluster32777;	46054941;	46055021;
Gypsy-30_PTr-LTR_22458	Chr01	46055924	46057040	cluster32779;	46056076;	46057087;
Ogre-PT2_I-int_22463	Chr01	46062285	46062608	cluster32794;	46062188;	46062636;
Ogre-PT2_I-int_22464	Chr01	46062818	46062890	cluster32795;	46062770;	46063169;
Gypsy-26_PTr-LTR_22465	Chr01	46062890	46062949	cluster32795;	46062770;	46063169;
Copia-55_PTr-LTR_22473	Chr01	46097407	46099087	cluster32819;	46097473;	46097633;
Helitron-N4_PTr_22485	Chr01	46110285	46111299	cluster32835;	46110770;	46110844;
hAT-5B_PTr_22497	Chr01	46161727	46161814	cluster32865;	46161721;	46162803;
hAT-5B_PTr_22498	Chr01	46162686	46162833	cluster32865;	46161721;	46162803;
Gypsy18-PTR_LTR_22503	Chr01	46168798	46169533	cluster32874;	46169100;	46169526;
ENSPM1_PT_22522	Chr01	46194889	46194986	cluster32905;	46194515;	46194990;
hAT-3_PTr_22542	Chr01	46253195	46256316	cluster32939;	46253538;	46256242;
ENSPM1_PT_22556	Chr01	46289279	46289911	cluster32960;	46289372;	46289711;
SINE2-2_PTr_22562	Chr01	46296966	46297134	cluster32968;	46296974;	46297134;
Gypsy-76_PTr-LTR_22611	Chr01	46393454	46393502	cluster33058;	46393332;	46393490;
Gypsy13-PTR_I-int_22617	Chr01	46436560	46438099	cluster33100;cluster33101;	46437011;46437245;	46437048;46437352;
Gypsy-79_PTr-LTR_22637	Chr01	46484780	46486102	cluster33143;	46484866;	46485065;
GYPOT1_LTR_22670	Chr01	46568576	46569205	cluster33222;	46568575;	46569160;
hAT-6_PTr_22712	Chr01	46603159	46603424	cluster33268;	46603336;	46603463;
ENSPM1_PT_22745	Chr01	46627526	46629623	cluster33299;	46628067;	46628614;
Copia41-PTR_I-int_22800	Chr01	46698308	46702617	cluster33360;	46702463;	46702616;
Copia-72_PT-I_22801	Chr01	46715544	46718550	cluster33367;cluster33368;	46716833;46717279;	46716960;46717327;
Gypsy18-PTR_LTR_22802	Chr01	46718551	46719159	cluster33370;	46718562;	46719930;
Copia5-PTR_LTR_22803	Chr01	46719153	46719399	cluster33370;	46718562;	46719930;
Gypsy18-PTR_LTR_22804	Chr01	46719382	46719932	cluster33370;	46718562;	46719930;
Copia-55_PTr-LTR_22813	Chr01	46728351	46730000	cluster33381;	46729097;	46729325;
Copia5-PTR_I-int_22848	Chr01	46807397	46807557	cluster33445;	46807424;	46808225;
Copia5-PTR_I-int_22849	Chr01	46807557	46808699	cluster33445;	46807424;	46808225;
Copia5-PTR_LTR_22850	Chr01	46808700	46809035	cluster33446;	46808590;	46808915;
Copia43-PTR_I-int_22851	Chr01	46809394	46809586	cluster33447;	46809309;	46809529;
Gypsy-74_PTr-LTR_22853	Chr01	46809877	46809996	cluster33448;	46809804;	46810058;
Gypsy-30_PTr-LTR_22857	Chr01	46811724	46812861	cluster33453;	46811687;	46812780;
Copia43-PTR_I-int_22870	Chr01	46825321	46826524	cluster33469;	46826330;	46826398;
Gypsy-71_PTr-LTR_22888	Chr01	46853261	46853441	cluster33503;	46853300;	46854117;
Gypsy-71_PTr-LTR_22889	Chr01	46853715	46854114	cluster33503;	46853300;	46854117;
Gypsy-72_PTr-LTR_22899	Chr01	46865143	46865212	cluster33520;	46865082;	46865483;
Gypsy-78_PTr-I_22900	Chr01	46865297	46865503	cluster33520;	46865082;	46865483;
Gypsy-72_PTr-LTR_22918	Chr01	46888339	46888522	cluster33549;	46888293;	46888479;
Gypsy-71_PTr-LTR_22972	Chr01	46951648	46952497	cluster33619;	46951688;	46952231;
Copia43-PTR_I-int_22974	Chr01	46954190	46957625	cluster33625;	46954425;	46954669;
Gypsy-79_PTr-LTR_23043	Chr01	47090227	47091317	cluster33747;	47090663;	47090916;
L1-3_PTr_23084	Chr01	47170889	47176091	cluster33798;	47173288;	47173331;
Copia-3_PTri-I_23097	Chr01	47199207	47199334	cluster33828;	47199191;	47199253;
PTr-3_23098	Chr01	47199915	47200081	cluster33829;	47199879;	47200057;
SINE2-2_PTr_23099	Chr01	47201396	47201575	cluster33830;	47201412;	47201587;
Gypsy-73_PTr-LTR_23110	Chr01	47227488	47228840	cluster33843;	47227591;	47227732;
Helitron-1_PTr_23151	Chr01	47306611	47306739	cluster33904;	47306626;	47306768;
Helitron-N3_PTr_23158	Chr01	47316492	47317624	cluster33918;	47316464;	47317058;
Gypsy7-PTR_I-int_23186	Chr01	47366427	47367152	cluster33967;	47366898;	47366975;
Helitron-N3_PTr_23229	Chr01	47480164	47481118	cluster34061;	47480230;	47480313;
Gypsy-71_PTr-LTR_23251	Chr01	47505864	47506855	cluster34093;	47506281;	47506421;
Ogre-PT2_LTR_23270	Chr01	47534955	47536450	cluster34116;	47535346;	47537171;
Ogre-PT2_I-int_23271	Chr01	47536450	47536740	cluster34116;	47535346;	47537171;
Ogre-PT2_I-int_23272	Chr01	47536717	47537218	cluster34116;	47535346;	47537171;
Ogre-PT2_I-int_23274	Chr01	47539279	47540033	cluster34121;	47539500;	47539621;
Ogre-PT2_I-int_23276	Chr01	47540377	47540925	cluster34123;	47540466;	47541153;
Ogre-PT2_I-int_23280	Chr01	47542475	47544968	cluster34129;	47543848;	47543911;
Helitron-N3_PTr_23322	Chr01	47612299	47612879	cluster34187;	47612521;	47612674;
Copia23-PTR_I-int_23326	Chr01	47621026	47623591	cluster34199;	47621966;	47622487;
Copia23-PTR_I-int_23327	Chr01	47623700	47625587	cluster34203;	47623918;	47624076;
Gypsy-79_PTr-LTR_23334	Chr01	47636437	47636941	cluster34222;	47636576;	47636927;
SINE2-2_PTr_23360	Chr01	47681888	47682044	cluster34258;	47681898;	47681993;
Copia14-PTR_LTR_23379	Chr01	47717669	47718068	cluster34297;	47717670;	47719367;
Copia14-PTR_I-int_23380	Chr01	47718069	47720550	cluster34297;	47717670;	47719367;
Helitron-N3_PTr_23384	Chr01	47730059	47731020	cluster34312;	47730365;	47730455;
Gypsy-79_PTr-LTR_23393	Chr01	47743219	47744315	cluster34328;	47744090;	47744174;
SINE2-2_PTr_23400	Chr01	47749332	47749504	cluster34331;	47749331;	47749504;
Gypsy13-PTR_LTR_23410	Chr01	47763977	47764163	cluster34351;	47764041;	47764091;
DNA-3-1_PTr_23421	Chr01	47768129	47768338	cluster34359;	47768203;	47768257;
Copia-60_PT-I_23425	Chr01	47799028	47800657	cluster34377;	47799132;	47799794;
Helitron-N3_PTr_23441	Chr01	47823396	47823650	cluster34399;	47823499;	47823685;
Helitron-N3_PTr_23445	Chr01	47829020	47830156	cluster34405;	47829532;	47829652;
Gypsy-76_PTr-LTR_23450	Chr01	47835313	47835482	cluster34414;	47835278;	47835495;
Gypsy-26_PTr-LTR_23466	Chr01	47857266	47857656	cluster34440;	47857618;	47857677;
Helitron-N3_PTr_23485	Chr01	47905833	47907099	cluster34482;	47906515;	47906898;
Helitron-1_PTr_23486	Chr01	47908990	47909141	cluster34483;	47908898;	47909237;
Copia-55_PTr-I_23493	Chr01	47919136	47919988	cluster34502;	47919318;	47919413;
Copia-55_PTr-LTR_23495	Chr01	47920487	47920822	cluster34505;	47920424;	47920593;
Gypsy-79_PTr-LTR_23516	Chr01	47959537	47960960	cluster34545;	47960163;	47960212;
Gypsy13-PTR_I-int_23612	Chr01	48074171	48076306	cluster34640;	48074505;	48074587;
Gypsy-26_PTr-LTR_23620	Chr01	48087072	48087541	cluster34648;	48087217;	48087315;
Gypsy17-PTR_I-int_23624	Chr01	48089914	48092243	cluster34652;	48092140;	48092204;
Ogre-PT3_I-int_23637	Chr01	48102722	48103619	cluster34666;	48103118;	48103194;
Gypsy-79_PTr-LTR_23690	Chr01	48166214	48166986	cluster34728;	48166373;	48166890;
Gypsy-71_PTr-LTR_23743	Chr01	48216523	48216794	cluster34766;	48216527;	48216749;
Gypsy-73_PTr-LTR_23763	Chr01	48243752	48244528	cluster34783;	48243801;	48243896;
Gypsy-79_PTr-LTR_23788	Chr01	48278176	48278855	cluster34805;	48278579;	48278709;
SINE2-1_PTr_23822	Chr01	48380922	48381071	cluster34870;	48380923;	48381037;
Helitron-1_PTr_23825	Chr01	48383092	48383207	cluster34873;	48383151;	48383191;
SINE2-2_PTr_23845	Chr01	48426358	48426524	cluster34911;	48426396;	48426524;
POPCOP2_I-int_23851	Chr01	48447446	48448965	cluster34924;	48448564;	48448605;
EnSpm1B_PT_23895	Chr01	48505210	48507066	cluster34950;	48506359;	48506390;
Copia-92_PTr-I_23929	Chr01	48553720	48554411	cluster34994;	48553736;	48553968;
Copia-56_PTr-I_23953	Chr01	48580066	48580385	cluster35023;	48580183;	48580231;
Helitron-N3_PTr_24017	Chr01	48644562	48645022	cluster35087;	48644646;	48644741;
Gypsy-73_PTr-LTR_24025	Chr01	48647835	48648547	cluster35093;	48648348;	48648416;
Copia8-PTR_I-int_24030	Chr01	48653743	48657865	cluster35102;	48654404;	48654457;
Harbinger1_PTr_24036	Chr01	48666371	48670496	cluster35111;	48666497;	48667446;
Ogre-PT1_I-int_24057	Chr01	48687162	48688527	cluster35134;	48687486;	48687973;
Ogre-PT2_I-int_24070	Chr01	48697726	48700586	cluster35147;cluster35149;	48697970;48699352;	48698359;48699408;
Ogre-PT2_I-int_24073	Chr01	48704827	48711379	cluster35160;	48708052;	48708203;
Gypsy-71_PTr-LTR_24095	Chr01	48727734	48727983	cluster35182;	48727744;	48727933;
Copia-3_PTri-I_24098	Chr01	48753680	48753792	cluster35194;	48753722;	48753873;
Copia-3_PTri-I_24099	Chr01	48753793	48753870	cluster35194;	48753722;	48753873;
Helitron-1_PTr_24170	Chr01	48933351	48933477	cluster35311;	48933351;	48933460;
Gypsy13-PTR_I-int_24187	Chr01	48975944	48977231	cluster35342;	48977092;	48977156;
Gypsy13-PTR_I-int_24188	Chr01	48977233	48979217	cluster35345;	48978336;	48978389;
Helitron-N3_PTr_24202	Chr01	49010463	49011172	cluster35368;	49010555;	49011050;
Helitron-N3_PTr_24207	Chr01	49055693	49055853	cluster35392;	49055738;	49055855;
Copia-3_PTri-I_24224	Chr01	49120827	49121001	cluster35430;	49120824;	49121937;
DNA-3-1_PTr_24225	Chr01	49121137	49121936	cluster35430;	49120824;	49121937;
Copia-3_PTri-I_24233	Chr01	49128356	49128571	cluster35442;	49128284;	49128655;
Copia-3_PTri-I_24234	Chr01	49128572	49128649	cluster35442;	49128284;	49128655;
Copia35-PTR_I-int_24264	Chr01	49202784	49206895	cluster35493;	49205816;	49206128;
DNA-3-1_PTr_24268	Chr01	49218119	49219046	cluster35498;	49218124;	49219047;
Helitron-2_PTr_24269	Chr01	49218941	49219061	cluster35498;	49218124;	49219047;
Gypsy18-PTR_LTR_24274	Chr01	49229278	49229900	cluster35505;	49227713;	49232556;
Gypsy18-PTR_LTR_24275	Chr01	49229928	49230701	cluster35505;	49227713;	49232556;
Gypsy18-PTR_I-int_24276	Chr01	49230702	49231312	cluster35505;	49227713;	49232556;
Gypsy-73_PTr-LTR_24285	Chr01	49250045	49250941	cluster35511;	49250301;	49250459;
Gypsy-78_PTr-LTR_24320	Chr01	49295212	49295531	cluster35552;	49295406;	49295440;
Copia43-PTR_I-int_24337	Chr01	49317032	49321647	cluster35584;	49320614;	49320878;
Copia-79_PT-I_24346	Chr01	49337208	49338732	cluster35601;	49338368;	49338731;
Ogre-PT3_I-int_24403	Chr01	49465019	49466575	cluster35686;	49466227;	49466366;
Copia-3_PTri-I_24419	Chr01	49524830	49525053	cluster35731;	49524873;	49525123;
Copia-3_PTri-I_24420	Chr01	49525054	49525131	cluster35731;	49524873;	49525123;
Copia-56_PTr-I_24421	Chr01	49526432	49526906	cluster35732;	49526738;	49526825;
Gypsy-73_PTr-LTR_24422	Chr01	49526495	49526924	cluster35732;	49526738;	49526825;
Copia11-PTR_I-int_24432	Chr01	49530882	49531561	cluster35734;	49531476;	49531571;
Copia11-PTR_I-int_24434	Chr01	49533601	49535002	cluster35737;	49533579;	49533701;
Gypsy-79_PTr-LTR_24461	Chr01	49590843	49592873	cluster35792;	49591975;	49592069;
ENSPM1_PT_24527	Chr01	49669972	49674282	cluster35879;	49671055;	49671318;
Gypsy-79_PTr-LTR_24538	Chr01	49679896	49680519	cluster35890;	49680229;	49680462;
GYPOT1_LTR_24557	Chr01	49718363	49720525	cluster35919;	49718391;	49730810;
GYPOT1_I-int_24558	Chr01	49720526	49720873	cluster35919;	49718391;	49730810;
GYPOT1_I-int_24559	Chr01	49720870	49721315	cluster35919;	49718391;	49730810;
GYPOT1_I-int_24560	Chr01	49721304	49724149	cluster35919;	49718391;	49730810;
GYPOT1_LTR_24561	Chr01	49724244	49725332	cluster35919;	49718391;	49730810;
GYPOT1_LTR_24562	Chr01	49725329	49725475	cluster35919;	49718391;	49730810;
GYPOT1_I-int_24563	Chr01	49725476	49727016	cluster35919;	49718391;	49730810;
GYPOT1_I-int_24564	Chr01	49727002	49727790	cluster35919;	49718391;	49730810;
GYPOT1_I-int_24565	Chr01	49727779	49728168	cluster35919;	49718391;	49730810;
GYPOT1_I-int_24566	Chr01	49728165	49728267	cluster35919;	49718391;	49730810;
GYPOT1_I-int_24567	Chr01	49728441	49728681	cluster35919;	49718391;	49730810;
GYPOT1_LTR_24568	Chr01	49728682	49730813	cluster35919;	49718391;	49730810;
Copia-92_PTr-I_24578	Chr01	49738765	49740169	cluster35928;	49739335;	49739398;
SINE2-2_PTr_24580	Chr01	49749040	49749206	cluster35936;	49749040;	49749277;
Ogre-PT1_I-int_24587	Chr01	49754562	49754834	cluster35941;	49754752;	49754821;
Helitron-1_PTr_24605	Chr01	49798787	49798927	cluster35964;	49798735;	49798943;
Helitron-N4_PTr_24614	Chr01	49812401	49813165	cluster35972;	49812608;	49812892;
Copia-84_PT-I_24617	Chr01	49821702	49825956	cluster35980;cluster35983;	49823565;49825105;	49823695;49825147;
Helitron-1_PTr_24650	Chr01	49914888	49915028	cluster36019;	49914917;	49915052;
Helitron-N3_PTr_24651	Chr01	49920624	49921285	cluster36020;cluster36021;	49920820;49921011;	49920883;49921225;
Helitron-1_PTr_24659	Chr01	49945446	49945683	cluster36034;	49945555;	49945721;
Helitron-1_PTr_24719	Chr01	50005556	50005697	cluster36102;	50005551;	50005735;
Helitron-1_PTr_24763	Chr01	50153563	50153725	cluster36176;	50153541;	50153662;
Helitron-N3_PTr_24772	Chr01	50173151	50173514	cluster36189;	50173245;	50173754;
SINE2-2_PTr_24774	Chr01	50177131	50177294	cluster36193;	50177140;	50177271;
DNA-3-1_PTr_24776	Chr01	50178267	50179048	cluster36194;	50178334;	50179250;
DNA-3-1_PTr_24779	Chr01	50187507	50187838	cluster36200;	50187505;	50188802;
DNA-3-1_PTr_24780	Chr01	50187839	50188801	cluster36200;	50187505;	50188802;
Copia-91_PTr-LTR_24787	Chr01	50207691	50208342	cluster36221;	50207946;	50208689;
Copia-93_PTr-LTR_24846	Chr01	50357324	50357639	cluster36321;	50356929;	50358475;
Copia-93_PTr-I_24847	Chr01	50357654	50358475	cluster36321;	50356929;	50358475;
Gypsy-79_PTr-LTR_24868	Chr01	50426758	50427644	cluster36364;	50426936;	50427477;
hAT-5_PTr_24984	Chr02	320580	321174	cluster36634;cluster36635;	320579;320850;	320664;321049;
Gypsy-26_PTr-LTR_25009	Chr02	437654	438218	cluster36689;	437757;	438085;
Gypsy-26_PTr-LTR_25010	Chr02	438971	439442	cluster36691;	439166;	439414;
Helitron-N3_PTr_25012	Chr02	443676	445371	cluster36694;	443576;	445336;
Helitron-N1_PTr_25025	Chr02	508419	509241	cluster36736;	508501;	509179;
Ogre-PT3_LTR_25049	Chr02	595099	595424	cluster36783;	595090;	595184;
hAT-6_PTr_25073	Chr02	682237	682351	cluster36835;	682251;	682413;
SINE2-1_PTr_25079	Chr02	710610	710801	cluster36849;	710614;	710789;
Helitron-N4_PTr_25168	Chr02	1084321	1084820	cluster37044;	1084527;	1084674;
SINE2-2_PTr_25173	Chr02	1109832	1109984	cluster37059;	1109872;	1109988;
Helitron-N2_PTr_25176	Chr02	1121707	1121953	cluster37065;	1121763;	1121947;
SINE2-1_PTr_25228	Chr02	1298128	1298324	cluster37143;	1298133;	1298350;
DNA-3-3_PTr_25234	Chr02	1310601	1311369	cluster37148;	1310607;	1311309;
SINE2-1_PTr_25235	Chr02	1323437	1323634	cluster37152;	1323423;	1323629;
Copia-3_PTri-I_25332	Chr02	1621694	1621771	cluster37275;	1621688;	1621916;
Copia-3_PTri-I_25333	Chr02	1621772	1621916	cluster37275;	1621688;	1621916;
EnSpm1B_PT_25409	Chr02	1703795	1703882	cluster37335;	1703668;	1703959;
Helitron-1_PTr_25414	Chr02	1724433	1724569	cluster37344;	1724530;	1724576;
Helitron-1_PTr_25419	Chr02	1741048	1741148	cluster37350;	1741056;	1741156;
DNA-3-2_PTr_25433	Chr02	1773805	1773971	cluster37388;	1773807;	1773863;
DNA-3-1_PTr_25459	Chr02	1883660	1884620	cluster37430;	1883661;	1884610;
Copia-3_PTri-I_25461	Chr02	1898246	1898460	cluster37432;	1898255;	1898703;
Copia-3_PTri-I_25462	Chr02	1898461	1898541	cluster37432;	1898255;	1898703;
hAT-3_PTr_25497	Chr02	2024047	2024373	cluster37501;	2024047;	2024303;
SINE2-2_PTr_25527	Chr02	2140207	2140383	cluster37559;	2140200;	2140382;
SINE2-2_PTr_25588	Chr02	2303100	2303279	cluster37654;	2303096;	2303278;
Helitron-N3_PTr_25626	Chr02	2425240	2425679	cluster37717;	2425477;	2425600;
SINE2-1_PTr_25639	Chr02	2480343	2480541	cluster37747;	2480352;	2480617;
DNA-3-1_PTr_25692	Chr02	2698446	2699278	cluster37837;	2698448;	2699278;
Helitron-N4_PTr_25747	Chr02	2931382	2931445	cluster37939;	2931210;	2932479;
Helitron-N4_PTr_25748	Chr02	2931450	2931695	cluster37939;	2931210;	2932479;
Helitron-N4_PTr_25749	Chr02	2931707	2931774	cluster37939;	2931210;	2932479;
Helitron-N4_PTr_25750	Chr02	2931812	2932003	cluster37939;	2931210;	2932479;
Helitron-N4_PTr_25751	Chr02	2932015	2932163	cluster37939;	2931210;	2932479;
Helitron-N4_PTr_25752	Chr02	2932166	2932282	cluster37939;	2931210;	2932479;
Helitron-N4_PTr_25753	Chr02	2932267	2932418	cluster37939;	2931210;	2932479;
DNA-3-1_PTr_25780	Chr02	2987084	2987881	cluster37965;	2987086;	2987767;
Helitron-N3_PTr_25789	Chr02	3032219	3032940	cluster37987;	3032552;	3032769;
Helitron-1_PTr_25808	Chr02	3100850	3100995	cluster38034;	3100895;	3100954;
Helitron-N4_PTr_25825	Chr02	3166641	3168455	cluster38078;cluster38079;	3167639;3167877;	3167679;3168154;
Copia-91_PTr-LTR_25834	Chr02	3188770	3189729	cluster38095;	3188962;	3189696;
Helitron-N3_PTr_25895	Chr02	3372278	3373096	cluster38203;	3372413;	3372974;
Helitron-N4_PTr_25968	Chr02	3620279	3620523	cluster38343;	3620447;	3620501;
Helitron-1_PTr_25981	Chr02	3681981	3682120	cluster38374;	3682052;	3682093;
Helitron-N2_PTr_26039	Chr02	3870554	3871811	cluster38505;	3871439;	3871555;
Ogre-PT2_I-int_26049	Chr02	3884395	3886224	cluster38520;	3885358;	3885461;
Helitron-N1_PTr_26066	Chr02	3931297	3931495	cluster38546;	3931287;	3932622;
Helitron-N1_PTr_26067	Chr02	3931502	3932617	cluster38546;	3931287;	3932622;
DNA-3-1_PTr_26083	Chr02	4012263	4012972	cluster38569;	4012339;	4012510;
ENSPM1_PT_26090	Chr02	4059445	4059736	cluster38593;	4059440;	4059708;
Helitron-N3_PTr_26100	Chr02	4093846	4094297	cluster38608;	4094033;	4094210;
DNA-3-3_PTr_26187	Chr02	4412698	4413165	cluster38779;	4412646;	4413227;
Copia-3_PTri-I_26194	Chr02	4426012	4426227	cluster38798;	4425936;	4426264;
DNA-3-1_PTr_26196	Chr02	4426660	4427239	cluster38800;	4426859;	4427397;
DNA-3-1_PTr_26197	Chr02	4427240	4427426	cluster38800;	4426859;	4427397;
hAT-4_PTr_26293	Chr02	4776881	4777370	cluster38978;	4776679;	4777448;
hAT-1N_PTr_26303	Chr02	4811398	4811560	cluster39000;	4811378;	4811643;
hAT-3_PTr_26304	Chr02	4811504	4811655	cluster39000;	4811378;	4811643;
Helitron-N3_PTr_26327	Chr02	4863818	4864885	cluster39029;	4864513;	4864581;
Helitron-1_PTr_26337	Chr02	4882769	4882890	cluster39041;	4882766;	4882862;
PTr-3_26341	Chr02	4898298	4898375	cluster39047;	4898289;	4898369;
SINE2-1_PTr_26401	Chr02	5081920	5082106	cluster39169;	5081782;	5082106;
Copia-55_PTr-LTR_26476	Chr02	5329865	5331550	cluster39318;	5330438;	5330493;
DNA-3-3_PTr_26478	Chr02	5343828	5344630	cluster39324;	5343828;	5344612;
Helitron-N4_PTr_26500	Chr02	5464855	5465989	cluster39393;	5464884;	5465024;
SINE2-2_PTr_26510	Chr02	5526015	5526192	cluster39421;	5525826;	5526191;
DNA-3-1_PTr_26526	Chr02	5564606	5565370	cluster39437;	5565016;	5565324;
ENSPM1_PT_26535	Chr02	5621438	5621711	cluster39459;	5621360;	5621778;
SINE2-2_PTr_26546	Chr02	5637300	5637461	cluster39475;	5637289;	5637403;
SINE2-1_PTr_26594	Chr02	5789907	5789978	cluster39568;	5789927;	5789962;
Gypsy-75_PTr-I_26603	Chr02	5827805	5828814	cluster39597;	5827882;	5828487;
Copia-3_PTri-I_26714	Chr02	6224388	6224585	cluster39772;	6224387;	6224656;
Copia-3_PTri-I_26715	Chr02	6224586	6224672	cluster39772;	6224387;	6224656;
SINE2-2_PTr_26719	Chr02	6244806	6244943	cluster39780;	6244836;	6245011;
Helitron-N2_PTr_26771	Chr02	6451605	6452065	cluster39917;	6451649;	6451989;
Helitron-N3_PTr_26803	Chr02	6554250	6554969	cluster39983;	6554449;	6554524;
Helitron-N2_PTr_26807	Chr02	6560834	6561258	cluster39989;	6561085;	6561161;
Helitron-N3_PTr_26853	Chr02	6721766	6722412	cluster40064;	6721951;	6722129;
Copia8-PTR_LTR_26866	Chr02	6737665	6737935	cluster40072;	6737675;	6738450;
Copia8-PTR_I-int_26867	Chr02	6737936	6742152	cluster40072;cluster40074;	6737675;6739372;	6738450;6739628;
Helitron-N4_PTr_26871	Chr02	6753806	6753870	cluster40096;	6753675;	6755360;
Helitron-N4_PTr_26872	Chr02	6753874	6754027	cluster40096;	6753675;	6755360;
Helitron-N4_PTr_26873	Chr02	6754042	6754125	cluster40096;	6753675;	6755360;
Helitron-N4_PTr_26874	Chr02	6754195	6754238	cluster40096;	6753675;	6755360;
Helitron-N4_PTr_26875	Chr02	6754240	6754411	cluster40096;	6753675;	6755360;
Helitron-N4_PTr_26876	Chr02	6754442	6754499	cluster40096;	6753675;	6755360;
Helitron-N4_PTr_26877	Chr02	6754496	6754653	cluster40096;	6753675;	6755360;
Helitron-N4_PTr_26878	Chr02	6754677	6754834	cluster40096;	6753675;	6755360;
Helitron-N4_PTr_26879	Chr02	6754837	6754965	cluster40096;	6753675;	6755360;
Helitron-N4_PTr_26880	Chr02	6754960	6755232	cluster40096;	6753675;	6755360;
Helitron-N4_PTr_26881	Chr02	6755249	6755364	cluster40096;	6753675;	6755360;
Copia-55_PTr-I_26983	Chr02	7071042	7071487	cluster40258;	7071235;	7071304;
Helitron-N4_PTr_27041	Chr02	7206016	7206550	cluster40310;	7206096;	7206148;
DNA-3-1_PTr_27098	Chr02	7336954	7337168	cluster40380;	7336444;	7337090;
Ogre-PT2_LTR_27143	Chr02	7482026	7484767	cluster40480;	7483279;	7483682;
DNA-3-3_PTr_27158	Chr02	7555620	7555767	cluster40510;	7555620;	7556157;
DNA-3-2B_PTr_27159	Chr02	7555812	7556145	cluster40510;	7555620;	7556157;
Helitron-N3_PTr_27240	Chr02	7775970	7776242	cluster40638;	7775993;	7776287;
hAT-1N_PTr_27273	Chr02	7882659	7882835	cluster40710;	7882437;	7883528;
hAT-3_PTr_27274	Chr02	7883363	7883530	cluster40710;	7882437;	7883528;
SINE2-2_PTr_27276	Chr02	7884992	7885162	cluster40712;	7884992;	7885150;
Copia47-PTR_I-int_27319	Chr02	8061234	8062942	cluster40805;	8062345;	8062433;
Helitron-N2_PTr_27414	Chr02	8413218	8414310	cluster41007;	8413771;	8414259;
Helitron-1_PTr_27415	Chr02	8415134	8415268	cluster41008;	8415182;	8415291;
Helitron-N3_PTr_27416	Chr02	8417685	8417766	cluster41011;	8417706;	8417764;
Helitron-N4_PTr_27438	Chr02	8479984	8480203	cluster41037;	8480044;	8480316;
Copia-3_PTri-I_27489	Chr02	8595367	8595513	cluster41100;	8595334;	8595858;
Copia-3_PTri-I_27490	Chr02	8595514	8595727	cluster41100;	8595334;	8595858;
Copia-3_PTri-I_27491	Chr02	8595728	8595777	cluster41100;	8595334;	8595858;
Copia-3_PTri-I_27492	Chr02	8595795	8595892	cluster41100;	8595334;	8595858;
Helitron-N4_PTr_27528	Chr02	8674475	8674652	cluster41151;	8674442;	8676492;
Helitron-N4_PTr_27529	Chr02	8674626	8674759	cluster41151;	8674442;	8676492;
Helitron-N4_PTr_27530	Chr02	8674796	8674892	cluster41151;	8674442;	8676492;
Helitron-N4_PTr_27531	Chr02	8674930	8674999	cluster41151;	8674442;	8676492;
Helitron-N4_PTr_27532	Chr02	8675002	8675160	cluster41151;	8674442;	8676492;
Helitron-N4_PTr_27533	Chr02	8675184	8675336	cluster41151;	8674442;	8676492;
Helitron-N4_PTr_27534	Chr02	8675337	8675487	cluster41151;	8674442;	8676492;
Helitron-N4_PTr_27535	Chr02	8675510	8675705	cluster41151;	8674442;	8676492;
Helitron-N4_PTr_27536	Chr02	8675695	8675807	cluster41151;	8674442;	8676492;
Helitron-N4_PTr_27537	Chr02	8675819	8675902	cluster41151;	8674442;	8676492;
Helitron-N4_PTr_27538	Chr02	8675915	8676072	cluster41151;	8674442;	8676492;
Helitron-N4_PTr_27539	Chr02	8676077	8676140	cluster41151;	8674442;	8676492;
Helitron-N3_PTr_27552	Chr02	8726101	8726730	cluster41178;	8726487;	8726754;
Gypsy-79_PTr-LTR_27555	Chr02	8735014	8735563	cluster41181;	8735156;	8735636;
Helitron-N3_PTr_27557	Chr02	8736991	8737653	cluster41183;	8737012;	8737453;
Helitron-1_PTr_27603	Chr02	8861468	8861582	cluster41238;	8861461;	8861568;
Gypsy-79_PTr-LTR_27611	Chr02	8900909	8902242	cluster41267;	8900954;	8901733;
Copia22-PTR_I-int_27626	Chr02	8940278	8941679	cluster41285;	8940886;	8941021;
SINE2-1_PTr_27661	Chr02	9041124	9041315	cluster41348;	9041123;	9041315;
hAT-2_PTr_27713	Chr02	9167512	9168480	cluster41418;	9167603;	9168272;
Helitron-N3_PTr_27759	Chr02	9329285	9329620	cluster41503;	9329521;	9329594;
Helitron-1_PTr_27945	Chr02	9905332	9905447	cluster41808;	9905381;	9905417;
SINE2-2_PTr_27963	Chr02	9963704	9963880	cluster41834;	9963705;	9963869;
Helitron-1_PTr_28005	Chr02	10127940	10128988	cluster41932;	10128115;	10128146;
Helitron-1_PTr_28006	Chr02	10129895	10130629	cluster41934;cluster41935;	10129892;10130542;	10130105;10130667;
DNA-3-3_PTr_28007	Chr02	10131805	10132405	cluster41936;	10131804;	10132576;
DNA-3-2_PTr_28008	Chr02	10132374	10132576	cluster41936;	10131804;	10132576;
Helitron-1_PTr_28009	Chr02	10133053	10133195	cluster41937;	10133089;	10133199;
Helitron-N2_PTr_28066	Chr02	10281813	10283264	cluster42020;	10282051;	10282237;
SINE2-2_PTr_28153	Chr02	10568044	10568215	cluster42197;	10568091;	10568216;
Helitron-1_PTr_28157	Chr02	10577327	10577698	cluster42199;	10577347;	10577462;
SINE2-2_PTr_28158	Chr02	10582508	10582673	cluster42200;	10582527;	10582607;
Gypsy-71_PTr-LTR_28175	Chr02	10662986	10663470	cluster42256;	10662977;	10663398;
Helitron-N4_PTr_28235	Chr02	10848174	10848320	cluster42359;	10848143;	10849368;
Helitron-N4_PTr_28236	Chr02	10848305	10848438	cluster42359;	10848143;	10849368;
Helitron-N4_PTr_28237	Chr02	10848443	10848600	cluster42359;	10848143;	10849368;
Helitron-N4_PTr_28238	Chr02	10848624	10848780	cluster42359;	10848143;	10849368;
Helitron-N4_PTr_28239	Chr02	10848777	10848834	cluster42359;	10848143;	10849368;
Helitron-N4_PTr_28240	Chr02	10848870	10849051	cluster42359;	10848143;	10849368;
Helitron-N4_PTr_28241	Chr02	10849089	10849155	cluster42359;	10848143;	10849368;
Helitron-N4_PTr_28242	Chr02	10849167	10849246	cluster42359;	10848143;	10849368;
tRNA-Glu_OS_28255	Chr02	10866846	10866937	cluster42363;	10866847;	10866929;
Copia53-PTR_I-int_28294	Chr02	10965710	10970274	cluster42432;	10966215;	10966610;
L1-2_PTr_28336	Chr02	11092357	11092788	cluster42508;	11092361;	11092571;
DNA-3-1_PTr_28358	Chr02	11198960	11199692	cluster42574;	11199245;	11199401;
Ogre-PT3_I-int_28375	Chr02	11222000	11222564	cluster42585;	11222195;	11222402;
Ogre-PT3_I-int_28382	Chr02	11227790	11227880	cluster42595;	11227824;	11229020;
Gypsy-26_PTr-LTR_28383	Chr02	11227881	11228137	cluster42595;	11227824;	11229020;
Gypsy-26_PTr-LTR_28384	Chr02	11228319	11228675	cluster42595;	11227824;	11229020;
Gypsy13-PTR_I-int_28387	Chr02	11230069	11234156	cluster42597;cluster42599;	11231104;11233128;	11232300;11233414;
DNA-3-2_PTr_28407	Chr02	11263650	11263694	cluster42632;	11263473;	11264001;
DNA-3-2_PTr_28408	Chr02	11263745	11263993	cluster42632;	11263473;	11264001;
Copia32-PTR_I-int_28446	Chr02	11308869	11313367	cluster42675;	11311937;	11311971;
SINE2-1_PTr_28457	Chr02	11319489	11319685	cluster42683;	11319437;	11319679;
hAT-1N_PTr_28458	Chr02	11322026	11322202	cluster42685;	11321934;	11322460;
hAT-3_PTr_28459	Chr02	11322177	11322236	cluster42685;	11321934;	11322460;
hAT-7_PTr_28460	Chr02	11322237	11322346	cluster42685;	11321934;	11322460;
hAT-3_PTr_28461	Chr02	11322347	11322411	cluster42685;	11321934;	11322460;
Helitron-2_PTr_28483	Chr02	11374755	11374824	cluster42719;	11374739;	11375007;
Helitron-1_PTr_28484	Chr02	11374925	11375033	cluster42719;	11374739;	11375007;
Gypsy-73_PTr-LTR_28542	Chr02	11524799	11527453	cluster42817;	11526974;	11527268;
Copia-55_PTr-LTR_28628	Chr02	11727190	11727621	cluster42939;	11727281;	11727497;
Copia-91_PTr-LTR_28812	Chr02	12248352	12249655	cluster43265;	12248595;	12249304;
ENSPM1_PT_28875	Chr02	12381849	12381972	cluster43363;	12381849;	12382074;
ENSPM1_PT_28876	Chr02	12381948	12382071	cluster43363;	12381849;	12382074;
Gypsy-28_PTr-LTR_28880	Chr02	12393399	12394024	cluster43368;	12393563;	12393697;
DNA-3-2B_PTr_28919	Chr02	12501469	12501739	cluster43439;	12501218;	12501656;
Helitron-N3_PTr_28924	Chr02	12508335	12508771	cluster43445;	12508626;	12508772;
hAT-1N_PTr_28930	Chr02	12515244	12515434	cluster43451;	12515196;	12515406;
DNA-3-1_PTr_28933	Chr02	12524201	12524989	cluster43453;	12524225;	12524989;
Helitron-1_PTr_28939	Chr02	12551055	12551954	cluster43466;cluster43467;	12551375;12551847;	12551713;12551918;
Helitron-N3_PTr_28994	Chr02	12706331	12706575	cluster43568;	12706340;	12706487;
Gypsy-79_PTr-LTR_28996	Chr02	12710193	12711013	cluster43573;	12710331;	12710521;
SINE2-1_PTr_29026	Chr02	12791367	12791558	cluster43626;	12791355;	12791549;
Helitron-1_PTr_29028	Chr02	12793531	12793668	cluster43628;	12793481;	12793685;
Helitron-1_PTr_29069	Chr02	12908867	12909003	cluster43700;	12908862;	12908979;
DNA-3-1_PTr_29109	Chr02	13042620	13043585	cluster43794;	13042619;	13042853;
Helitron-N1_PTr_29193	Chr02	13237668	13237726	cluster43917;	13237690;	13237800;
PTr-3_29207	Chr02	13284477	13284673	cluster43944;	13284477;	13284676;
ENSPM1_PT_29224	Chr02	13331088	13332949	cluster43972;	13331826;	13332321;
Helitron-1_PTr_29311	Chr02	13457667	13458731	cluster44062;	13457596;	13457779;
SINE2-1_PTr_29314	Chr02	13471213	13471408	cluster44077;	13471214;	13471409;
Helitron-1_PTr_29315	Chr02	13471924	13472061	cluster44078;	13471899;	13472037;
Helitron-N3_PTr_29318	Chr02	13476128	13477484	cluster44081;	13476207;	13476738;
hAT-5_PTr_29329	Chr02	13499436	13499619	cluster44098;	13499412;	13499714;
Helitron-N3_PTr_29358	Chr02	13557550	13558358	cluster44136;	13557572;	13557744;
Copia43-PTR_I-int_29365	Chr02	13569833	13570803	cluster44148;	13570462;	13570547;
Copia-56_PTr-I_29372	Chr02	13578840	13580601	cluster44160;	13580108;	13580573;
Gypsy-79_PTr-LTR_29384	Chr02	13589929	13590802	cluster44172;	13589873;	13590627;
hAT-2_PTr_29399	Chr02	13627363	13629049	cluster44190;	13627381;	13628081;
hAT-6_PTr_29471	Chr02	13767596	13769150	cluster44284;	13768107;	13769453;
Gypsy21-PTR_I-int_29479	Chr02	13777326	13777420	cluster44289;	13776975;	13777389;
Gypsy-28_PTr-LTR_29522	Chr02	13843755	13844204	cluster44328;	13844007;	13844270;
Copia-91_PTr-LTR_29536	Chr02	13877447	13878715	cluster44358;	13877688;	13878067;
Copia-91_PTr-LTR_29541	Chr02	13889311	13890786	cluster44366;	13889435;	13889756;
PTr-3_29568	Chr02	13925642	13925809	cluster44380;	13925679;	13925809;
Helitron-1_PTr_29572	Chr02	13929308	13929465	cluster44382;	13929337;	13929517;
Helitron-1_PTr_29603	Chr02	14016075	14016217	cluster44440;	14016164;	14016232;
hAT-5B_PTr_29659	Chr02	14106605	14106771	cluster44496;	14106521;	14107473;
hAT-5B_PTr_29660	Chr02	14107299	14107385	cluster44496;	14106521;	14107473;
Helitron-1_PTr_29665	Chr02	14126099	14126155	cluster44515;	14126010;	14126231;
Helitron-N4_PTr_29667	Chr02	14128695	14129291	cluster44517;	14129154;	14129185;
DNA-3-1_PTr_29740	Chr02	14286217	14287012	cluster44633;	14286328;	14287005;
DNA-3-2B_PTr_29741	Chr02	14287850	14289516	cluster44634;	14287755;	14289534;
Helitron-1_PTr_29763	Chr02	14354579	14354701	cluster44671;	14354605;	14354695;
Gypsy-74_PTr-LTR_29826	Chr02	14507464	14507671	cluster44766;	14507567;	14507691;
Gypsy-36_PT-I_29829	Chr02	14514465	14516076	cluster44773;	14515423;	14515494;
hAT-7_PTr_29900	Chr02	14679264	14679466	cluster44880;	14679336;	14679404;
Gypsy-78_PTr-LTR_29917	Chr02	14712045	14713043	cluster44910;	14712285;	14712464;
Helitron-N3_PTr_29964	Chr02	14797071	14798808	cluster44993;	14797304;	14797680;
hAT-1N_PTr_29965	Chr02	14800105	14800416	cluster44995;	14799737;	14801208;
hAT-1N_PTr_29966	Chr02	14800412	14800523	cluster44995;	14799737;	14801208;
hAT-1N_PTr_29967	Chr02	14800977	14801134	cluster44995;	14799737;	14801208;
Copia-3_PTri-I_30002	Chr02	14874151	14874365	cluster45064;	14874108;	14874358;
Gypsy-25_PTr-I_30034	Chr02	14949003	14950371	cluster45103;	14949346;	14949383;
Copia-54_PTr-I_30109	Chr02	15112862	15115827	cluster45224;	15113529;	15113704;
Helitron-2_PTr_30193	Chr02	15288977	15289102	cluster45319;	15288997;	15290644;
DNA-3-1_PTr_30194	Chr02	15288998	15289796	cluster45319;	15288997;	15290644;
DNA-3-1_PTr_30195	Chr02	15289806	15290057	cluster45319;	15288997;	15290644;
DNA-3-1_PTr_30196	Chr02	15290117	15290651	cluster45319;	15288997;	15290644;
Copia49-PTR_I-int_30245	Chr02	15378784	15379770	cluster45391;	15378760;	15378856;
Helitron-N3_PTr_30251	Chr02	15408794	15409268	cluster45406;	15409129;	15409197;
DNA-3-1_PTr_30252	Chr02	15409146	15409481	cluster45406;	15409129;	15409197;
Gypsy18-PTR_LTR_30331	Chr02	15595653	15597276	cluster45530;	15595308;	15597481;
ENSPM1_PT_30332	Chr02	15597284	15599857	cluster45532;	15598279;	15599583;
Helitron-N4_PTr_30380	Chr02	15714647	15715259	cluster45640;	15715047;	15715144;
SINE2-1_PTr_30423	Chr02	15800465	15800661	cluster45689;	15800479;	15800589;
Copia-3_PTri-I_30469	Chr02	15898030	15898244	cluster45746;	15898039;	15898318;
Copia-3_PTri-I_30470	Chr02	15898245	15898319	cluster45746;	15898039;	15898318;
Copia15-PTR_I-int_30475	Chr02	15909393	15910375	cluster45755;	15909663;	15909712;
Helitron-N3_PTr_30487	Chr02	15928032	15928733	cluster45767;	15928456;	15928614;
Helitron-N3_PTr_30496	Chr02	15951502	15951958	cluster45788;	15951920;	15951957;
Gypsy-79_PTr-LTR_30499	Chr02	15961966	15962478	cluster45796;	15962429;	15962464;
ENSPM1_PT_30508	Chr02	15987215	15989738	cluster45815;cluster45817;	15988027;15988986;	15988323;15989210;
EnSpm2_PTr_30510	Chr02	15991170	15994920	cluster45823;	15993258;	15994392;
Helitron-N3_PTr_30534	Chr02	16064904	16065581	cluster45884;	16065117;	16065270;
Copia-19_PTri-I_30546	Chr02	16081840	16083045	cluster45901;	16082286;	16082424;
Helitron-1_PTr_30553	Chr02	16091439	16092360	cluster45907;	16091512;	16091578;
SINE2-2_PTr_30568	Chr02	16113107	16113283	cluster45929;	16113109;	16113370;
SINE2-2_PTr_30569	Chr02	16113294	16113369	cluster45929;	16113109;	16113370;
Ogre-PT2_LTR_30609	Chr02	16219525	16222495	cluster46008;	16221066;	16221398;
Gypsy-79_PTr-LTR_30632	Chr02	16276379	16276926	cluster46045;	16276563;	16276909;
Gypsy-74_PTr-I_30653	Chr02	16303121	16304953	cluster46072;	16303585;	16303713;
Gypsy-74_PTr-LTR_30654	Chr02	16304969	16305045	cluster46074;	16304992;	16305104;
ENSPM1_PT_30656	Chr02	16306710	16306890	cluster46075;	16306670;	16307391;
EnSpm1B_PT_30657	Chr02	16306980	16307313	cluster46075;	16306670;	16307391;
Helitron-N4_PTr_30670	Chr02	16321969	16322109	cluster46084;	16321930;	16323627;
Helitron-N4_PTr_30671	Chr02	16322273	16322352	cluster46084;	16321930;	16323627;
Helitron-N4_PTr_30672	Chr02	16322349	16322504	cluster46084;	16321930;	16323627;
Helitron-N4_PTr_30673	Chr02	16322528	16322695	cluster46084;	16321930;	16323627;
Helitron-N4_PTr_30674	Chr02	16322696	16322848	cluster46084;	16321930;	16323627;
Helitron-N4_PTr_30675	Chr02	16322870	16323059	cluster46084;	16321930;	16323627;
Helitron-N4_PTr_30676	Chr02	16323096	16323163	cluster46084;	16321930;	16323627;
Helitron-N4_PTr_30677	Chr02	16323175	16323258	cluster46084;	16321930;	16323627;
Helitron-N4_PTr_30678	Chr02	16323271	16323425	cluster46084;	16321930;	16323627;
Helitron-N4_PTr_30679	Chr02	16323429	16323493	cluster46084;	16321930;	16323627;
EnSpm1B_PT_30682	Chr02	16331697	16332636	cluster46088;	16332225;	16332484;
Copia26-PTR_I-int_30719	Chr02	16376576	16380564	cluster46130;	16379346;	16379706;
hAT-3_PTr_30721	Chr02	16381106	16381441	cluster46132;	16381127;	16381289;
hAT-7_PTr_30722	Chr02	16381744	16381892	cluster46134;	16381754;	16381837;
ENSPM1_PT_30774	Chr02	16475233	16479161	cluster46200;cluster46202;cluster46203;cluster46205;	16477345;16477921;16478202;16478897;	16477563;16478063;16478380;16478930;
Gypsy-28_PTr-I_30784	Chr02	16492112	16493667	cluster46219;	16493279;	16493605;
Gypsy-37_PT-I_30833	Chr02	16622694	16625030	cluster46316;	16623961;	16624078;
Copia-91_PTr-LTR_30844	Chr02	16655181	16656802	cluster46340;	16656026;	16656252;
Gypsy-71_PTr-LTR_30866	Chr02	16698206	16698621	cluster46391;	16698103;	16698721;
hAT-2_PTr_30916	Chr02	16780877	16783600	cluster46454;	16783323;	16783426;
Helitron-N3_PTr_30926	Chr02	16798539	16799135	cluster46469;	16798700;	16798917;
Helitron-N1_PTr_30942	Chr02	16833204	16833552	cluster46498;	16833217;	16833466;
Helitron-N2_PTr_30983	Chr02	16942013	16943711	cluster46567;	16942199;	16942537;
POPGY1_LTR_30998	Chr02	16966588	16968095	cluster46592;	16966584;	16978041;
POPGY1_I-int_30999	Chr02	16968096	16970138	cluster46592;	16966584;	16978041;
POPGY1_I-int_31000	Chr02	16970181	16976433	cluster46592;	16966584;	16978041;
POPGY1_I-int_31001	Chr02	16976468	16976526	cluster46592;	16966584;	16978041;
POPGY1_LTR_31002	Chr02	16976527	16978064	cluster46592;	16966584;	16978041;
Gypsy18-PTR_I-int_31040	Chr02	17036792	17039601	cluster46640;cluster46641;	17038768;17039340;	17039004;17039576;
Gypsy13-PTR_I-int_31056	Chr02	17069083	17069939	cluster46671;	17069619;	17069701;
POPGY1_I-int_31107	Chr02	17125815	17129230	cluster46732;	17126463;	17126497;
Gypsy-25_PTr-I_31112	Chr02	17153194	17155159	cluster46750;cluster46751;	17153675;17154924;	17154011;17155045;
Gypsy-79_PTr-LTR_31143	Chr02	17231534	17232126	cluster46835;	17231626;	17232192;
Copia25-PTR_I-int_31181	Chr02	17280446	17281263	cluster46904;	17280823;	17280977;
Gypsy-78_PTr-I_31196	Chr02	17307657	17312314	cluster46933;	17312169;	17312242;
Gypsy-79_PTr-LTR_31198	Chr02	17313974	17316058	cluster46938;cluster46940;	17314162;17314633;	17314276;17315025;
Ogre-PT3_I-int_31200	Chr02	17317517	17320480	cluster46943;cluster46944;	17318055;17318523;	17318339;17318611;
Ogre-PT3_I-int_31202	Chr02	17320918	17327583	cluster46951;	17323478;	17324401;
hAT-5B_PTr_31208	Chr02	17347045	17347143	cluster46969;	17347043;	17347112;
ENSPM1_PT_31225	Chr02	17363091	17364758	cluster46981;	17363103;	17363263;
Copia-55_PTr-LTR_31323	Chr02	17486577	17487030	cluster47064;	17486943;	17487004;
Gypsy-72_PTr-LTR_31324	Chr02	17487246	17489721	cluster47066;cluster47067;	17487635;17487834;	17487704;17488087;
hAT-3_PTr_31333	Chr02	17499811	17499939	cluster47079;	17499849;	17500130;
hAT-3_PTr_31334	Chr02	17499907	17500060	cluster47079;	17499849;	17500130;
hAT-3_PTr_31335	Chr02	17499994	17500179	cluster47079;	17499849;	17500130;
Helitron-N1_PTr_31337	Chr02	17503911	17503951	cluster47084;	17503745;	17504013;
Gypsy18-PTR_LTR_31377	Chr02	17539758	17540649	cluster47123;	17539838;	17540794;
Gypsy18-PTR_I-int_31378	Chr02	17540672	17543374	cluster47125;cluster47126;	17541094;17541425;	17541324;17544700;
Gypsy18-PTR_LTR_31379	Chr02	17543351	17544238	cluster47126;	17541425;	17544700;
Ogre-PT1_I-int_31380	Chr02	17544249	17544639	cluster47126;	17541425;	17544700;
Ogre-PT1_I-int_31381	Chr02	17544610	17544743	cluster47126;	17541425;	17544700;
POPGY1_I-int_31384	Chr02	17546270	17553689	cluster47129;cluster47131;	17549141;17550916;	17549461;17552137;
Gypsy-25_PTr-LTR_31444	Chr02	17616345	17616707	cluster47184;	17616138;	17619163;
L1-1_PTr_31445	Chr02	17616707	17619108	cluster47184;	17616138;	17619163;
Copia-55_PTr-I_31458	Chr02	17632994	17633428	cluster47194;	17633036;	17633072;
Gypsy-73_PTr-LTR_31492	Chr02	17680927	17681381	cluster47249;	17681080;	17681231;
Gypsy18-PTR_LTR_31493	Chr02	17681489	17683047	cluster47252;cluster47254;	17682411;17682940;	17682538;17683036;
Copia-56_PTr-LTR_31594	Chr02	17820398	17820540	cluster47313;	17820399;	17820959;
Ogre-PT2_I-int_31650	Chr02	17897545	17902815	cluster47373;	17899266;	17900467;
Copia-55_PTr-LTR_31668	Chr02	17922338	17923176	cluster47391;	17922308;	17922666;
Ogre-PT3_I-int_31679	Chr02	17929493	17931033	cluster47399;	17929512;	17929657;
Gypsy-25_PTr-LTR_31700	Chr02	17947768	17948810	cluster47418;	17947784;	17948262;
ENSPM1_PT_31737	Chr02	17990222	17992767	cluster47442;	17990894;	17992490;
Gypsy-26_PTr-LTR_31745	Chr02	18002326	18002474	cluster47453;	18002336;	18002698;
Gypsy-28_PTr-LTR_31761	Chr02	18022019	18022324	cluster47468;	18022171;	18022309;
hAT-2_PTr_31763	Chr02	18027651	18027963	cluster47470;	18027749;	18027949;
POPGY2_LTR_31768	Chr02	18031488	18031995	cluster47474;	18031518;	18032433;
POPGY2_LTR_31769	Chr02	18031997	18032455	cluster47474;	18031518;	18032433;
Gypsy18-PTR_LTR_31812	Chr02	18113739	18113932	cluster47498;	18113752;	18115884;
Gypsy18-PTR_LTR_31813	Chr02	18114352	18115019	cluster47498;	18113752;	18115884;
Caulimovirus-1_PTr_31870	Chr02	18165851	18172280	cluster47554;	18168502;	18168566;
Caulimovirus-1_PTr_31874	Chr02	18174948	18177092	cluster47565;	18176136;	18177045;
Ogre-PT3_LTR_31905	Chr02	18203997	18204325	cluster47606;	18203998;	18204032;
EnSpm3_PT_31947	Chr02	18241011	18243632	cluster47628;	18241599;	18243414;
Copia29-PTR_I-int_31955	Chr02	18252206	18254390	cluster47639;	18253977;	18254351;
Gypsy-29_PTr-I_32029	Chr02	18319165	18321345	cluster47695;	18319551;	18319659;
hAT-7_PTr_32060	Chr02	18337039	18340146	cluster47722;	18337972;	18338290;
Gypsy-27_PTr-LTR_32063	Chr02	18341327	18342166	cluster47726;	18341328;	18341457;
POPGY2_LTR_32092	Chr02	18393024	18394571	cluster47775;	18393013;	18394575;
Gypsy-29_PTr-I_32108	Chr02	18409650	18410095	cluster47791;	18409685;	18409783;
Gypsy-29_PTr-I_32110	Chr02	18412156	18412732	cluster47794;	18412249;	18413885;
Gypsy-27_PTr-LTR_32111	Chr02	18412733	18413733	cluster47794;	18412249;	18413885;
Gypsy-27_PTr-I_32112	Chr02	18413734	18413772	cluster47794;	18412249;	18413885;
Gypsy-27_PTr-I_32113	Chr02	18414107	18415198	cluster47797;	18415026;	18415176;
L1-1_PTr_32161	Chr02	18451897	18454299	cluster47839;	18453278;	18454354;
Gypsy-27_PTr-I_32200	Chr02	18497412	18498176	cluster47875;	18497607;	18497746;
POPGY1_I-int_32206	Chr02	18500239	18501791	cluster47879;	18500295;	18502273;
Gypsy-76_PTr-LTR_32207	Chr02	18501792	18501959	cluster47879;	18500295;	18502273;
Gypsy-28_PTr-I_32296	Chr02	18558330	18562948	cluster47945;	18560552;	18561002;
Gypsy-76_PTr-LTR_32348	Chr02	18644653	18644702	cluster48062;	18644505;	18644683;
POPGY2_LTR_32371	Chr02	18707203	18708093	cluster48128;	18707224;	18708050;
Gypsy-25_PTr-LTR_32438	Chr02	18874981	18876771	cluster48227;	18876536;	18876879;
Gypsy-29_PTr-I_32439	Chr02	18876772	18877401	cluster48228;	18877018;	18877105;
Gypsy-78_PTr-I_32450	Chr02	18887273	18892259	cluster48245;	18887971;	18890784;
POPGY2_LTR_32483	Chr02	18922743	18924248	cluster48270;	18922737;	18933998;
POPGY1_I-int_32484	Chr02	18924248	18932523	cluster48270;	18922737;	18933998;
POPGY2_LTR_32485	Chr02	18932524	18934040	cluster48270;	18922737;	18933998;
Gypsy18-PTR_LTR_32510	Chr02	18954212	18955022	cluster48297;	18954206;	18956412;
Gypsy-25_PTr-LTR_32511	Chr02	18955024	18955490	cluster48297;	18954206;	18956412;
Gypsy-78_PTr-I_32517	Chr02	18959886	18959969	cluster48302;	18959834;	18960160;
Gypsy-78_PTr-I_32518	Chr02	18959952	18960188	cluster48302;	18959834;	18960160;
POPGY2_LTR_32522	Chr02	18961054	18962599	cluster48304;	18961093;	18962596;
POPGY1_I-int_32529	Chr02	18964777	18968067	cluster48311;	18965683;	18966298;
Gypsy-78_PTr-LTR_32558	Chr02	19007608	19008263	cluster48353;	19007529;	19007827;
Gypsy-72_PTr-LTR_32592	Chr02	19035347	19035916	cluster48380;	19035466;	19035547;
Copia36-PTR_I-int_32625	Chr02	19064429	19064565	cluster48397;	19064187;	19064599;
Gypsy18-PTR_LTR_32672	Chr02	19124791	19125797	cluster48439;	19125509;	19125778;
ENSPM1_PT_32684	Chr02	19133466	19135267	cluster48449;	19134897;	19135202;
POPGY2_LTR_32701	Chr02	19160987	19161467	cluster48457;	19160945;	19162834;
POPGY2_LTR_32702	Chr02	19161466	19162541	cluster48457;	19160945;	19162834;
Gypsy-29_PTr-LTR_32706	Chr02	19164327	19164850	cluster48459;	19164613;	19164850;
POPGY1_I-int_32724	Chr02	19201133	19203112	cluster48478;	19201172;	19204403;
POPGY1_I-int_32725	Chr02	19203154	19204502	cluster48478;	19201172;	19204403;
POPGY1_I-int_32726	Chr02	19204504	19206146	cluster48479;	19204522;	19207667;
POPGY2_LTR_32727	Chr02	19206145	19206509	cluster48479;	19204522;	19207667;
POPGY2_LTR_32728	Chr02	19206513	19206728	cluster48479;	19204522;	19207667;
POPGY2_LTR_32729	Chr02	19206784	19206886	cluster48479;	19204522;	19207667;
Gypsy18-PTR_LTR_32730	Chr02	19206887	19207073	cluster48479;	19204522;	19207667;
Caulimovirus-1_PTr_32750	Chr02	19239670	19240175	cluster48503;	19239893;	19240152;
Helitron-1_PTr_32762	Chr02	19256257	19257077	cluster48524;	19256759;	19256792;
Gypsy3-PTR_I-int_32819	Chr02	19331144	19335737	cluster48588;	19335343;	19335565;
Copia-55_PTr-LTR_32852	Chr02	19421378	19423072	cluster48636;	19421838;	19422728;
Gypsy-79_PTr-LTR_32858	Chr02	19436679	19437422	cluster48652;	19436902;	19437092;
tRNA-Pro_OS_32881	Chr02	19469507	19469578	cluster48677;	19469504;	19469589;
EnSpm3_PT_32882	Chr02	19469893	19470258	cluster48678;	19470054;	19470096;
Gypsy-78_PTr-LTR_32934	Chr02	19528301	19528830	cluster48731;	19528560;	19528644;
Copia-3_PTri-I_32952	Chr02	19551757	19551944	cluster48748;	19551762;	19552014;
Copia-3_PTri-I_32953	Chr02	19551945	19552022	cluster48748;	19551762;	19552014;
Copia-91_PTr-LTR_32991	Chr02	19627786	19628224	cluster48798;	19627874;	19628029;
Gypsy-78_PTr-I_33033	Chr02	19658555	19658855	cluster48828;	19658836;	19658868;
Gypsy18-PTR_LTR_33034	Chr02	19659176	19659304	cluster48829;	19659151;	19659291;
SINE2-2_PTr_33099	Chr02	19749525	19749677	cluster48913;	19749529;	19749745;
Helitron-N3_PTr_33147	Chr02	19820572	19820804	cluster48949;	19820608;	19820968;
Helitron-N3_PTr_33181	Chr02	19885458	19886190	cluster49002;	19885713;	19885772;
hAT-3_PTr_33183	Chr02	19891834	19891998	cluster49006;	19891886;	19892173;
hAT-3_PTr_33184	Chr02	19892002	19892170	cluster49006;	19891886;	19892173;
POPGY2_LTR_33203	Chr02	19916099	19916723	cluster49020;	19916053;	19918446;
POPGY1_LTR_33204	Chr02	19916905	19918442	cluster49020;	19916053;	19918446;
SINE2-2_PTr_33356	Chr02	20160089	20160248	cluster49210;	20160088;	20160244;
Copia-3_PTri-I_33371	Chr02	20198945	20199019	cluster49227;	20198942;	20199156;
Copia-3_PTri-I_33372	Chr02	20199020	20199228	cluster49227;	20198942;	20199156;
L1-3_PTr_33415	Chr02	20282182	20285638	cluster49269;	20282265;	20282643;
tRNA-Ile_OS_33423	Chr02	20294911	20294984	cluster49277;	20294908;	20294990;
Helitron-N3_PTr_33435	Chr02	20317019	20318057	cluster49295;	20317582;	20317620;
Gypsy-73_PTr-LTR_33472	Chr02	20357353	20358781	cluster49337;cluster49338;	20358019;20358286;	20358162;20358632;
Gypsy18-PTR_LTR_33585	Chr02	20491575	20492435	cluster49451;	20491602;	20493124;
Gypsy18-PTR_LTR_33586	Chr02	20492432	20492487	cluster49451;	20491602;	20493124;
Gypsy18-PTR_LTR_33587	Chr02	20492486	20493186	cluster49451;	20491602;	20493124;
Gypsy13-PTR_I-int_33600	Chr02	20508207	20510464	cluster49463;	20509964;	20510091;
Gypsy-29_PTr-I_33666	Chr02	20611051	20611735	cluster49510;	20611492;	20611729;
hAT-1N_PTr_33680	Chr02	20649751	20649942	cluster49535;	20649719;	20649945;
Gypsy-79_PTr-LTR_33684	Chr02	20661572	20662272	cluster49545;	20661749;	20661856;
POPGY1_I-int_33714	Chr02	20692368	20694110	cluster49582;	20692879;	20692935;
Gypsy-78_PTr-LTR_33776	Chr02	20782681	20783849	cluster49647;	20783111;	20783258;
hAT-3_PTr_33885	Chr02	20965916	20968915	cluster49813;	20968360;	20968517;
EnSpm1B_PT_33888	Chr02	20972748	20975880	cluster49818;	20972944;	20973127;
EnSpm3_PT_33916	Chr02	21022250	21030585	cluster49862;	21025398;	21030586;
hAT-3_PTr_33978	Chr02	21112085	21112153	cluster49922;	21111808;	21114115;
hAT-3_PTr_33979	Chr02	21112748	21114124	cluster49922;	21111808;	21114115;
Copia38-PTR_I-int_33982	Chr02	21119146	21120673	cluster49928;	21120194;	21120270;
Caulimovirus-1_PTr_33984	Chr02	21122531	21122567	cluster49932;	21122488;	21122843;
Caulimovirus-1_PTr_33985	Chr02	21122567	21124493	cluster49932;	21122488;	21122843;
Gypsy-30_PTr-LTR_34044	Chr02	21214777	21214952	cluster49995;	21214773;	21215017;
Ogre-PT1_I-int_34147	Chr02	21410942	21412034	cluster50128;	21411548;	21411828;
Copia47-PTR_I-int_34193	Chr02	21494547	21497012	cluster50213;	21496849;	21496923;
Copia47-PTR_I-int_34195	Chr02	21497311	21498564	cluster50214;	21497440;	21497787;
Gypsy-73_PTr-LTR_34228	Chr02	21553597	21554338	cluster50265;	21554141;	21554302;
hAT-3_PTr_34241	Chr02	21563057	21563214	cluster50270;	21563063;	21565079;
hAT-7_PTr_34242	Chr02	21563115	21563227	cluster50270;	21563063;	21565079;
hAT-3_PTr_34243	Chr02	21563310	21563490	cluster50270;	21563063;	21565079;
Helitron-N4_PTr_34244	Chr02	21563691	21563754	cluster50270;	21563063;	21565079;
Helitron-N4_PTr_34245	Chr02	21563760	21563913	cluster50270;	21563063;	21565079;
Helitron-N4_PTr_34246	Chr02	21563926	21564009	cluster50270;	21563063;	21565079;
Helitron-N4_PTr_34247	Chr02	21564021	21564132	cluster50270;	21563063;	21565079;
Helitron-N4_PTr_34248	Chr02	21564125	21564315	cluster50270;	21563063;	21565079;
Helitron-N4_PTr_34249	Chr02	21564389	21564489	cluster50270;	21563063;	21565079;
Helitron-N4_PTr_34250	Chr02	21564490	21564641	cluster50270;	21563063;	21565079;
Helitron-N4_PTr_34251	Chr02	21564665	21564817	cluster50270;	21563063;	21565079;
Helitron-N4_PTr_34252	Chr02	21564826	21564901	cluster50270;	21563063;	21565079;
Helitron-N4_PTr_34253	Chr02	21564936	21565086	cluster50270;	21563063;	21565079;
Helitron-N4_PTr_34254	Chr02	21565071	21565301	cluster50271;	21565260;	21565306;
Helitron-N4_PTr_34256	Chr02	21569762	21571736	cluster50275;cluster50277;	21569802;21571083;	21570022;21571505;
Gypsy-25_PTr-I_34337	Chr02	21720750	21721325	cluster50393;	21720988;	21721056;
Gypsy18-PTR_LTR_34357	Chr02	21753307	21754899	cluster50417;	21753348;	21754172;
Copia43-PTR_I-int_34363	Chr02	21765259	21768635	cluster50428;	21768045;	21768092;
Copia-62_PT-I_34410	Chr02	21837571	21838124	cluster50499;	21837730;	21837963;
Helitron-N4_PTr_34466	Chr02	21922258	21922374	cluster50576;	21922186;	21923229;
Helitron-N4_PTr_34467	Chr02	21922412	21922510	cluster50576;	21922186;	21923229;
Helitron-N4_PTr_34468	Chr02	21922491	21922647	cluster50576;	21922186;	21923229;
Helitron-N4_PTr_34469	Chr02	21922645	21922801	cluster50576;	21922186;	21923229;
Helitron-N4_PTr_34470	Chr02	21922778	21922949	cluster50576;	21922186;	21923229;
Helitron-N4_PTr_34471	Chr02	21922929	21923046	cluster50576;	21922186;	21923229;
Helitron-N4_PTr_34472	Chr02	21923050	21923208	cluster50576;	21922186;	21923229;
DNA-3-1_PTr_34476	Chr02	21926101	21926853	cluster50581;	21926096;	21926851;
Helitron-1_PTr_34477	Chr02	21927510	21927639	cluster50582;	21927492;	21927605;
Helitron-N3_PTr_34492	Chr02	21960887	21961187	cluster50603;	21960873;	21960940;
hAT-3_PTr_34501	Chr02	21990942	21991870	cluster50631;	21990968;	21991517;
Copia-56_PTr-I_34521	Chr02	22017816	22018550	cluster50649;	22018200;	22018255;
Copia-56_PTr-I_34527	Chr02	22024964	22026635	cluster50656;cluster50657;	22025013;22026107;	22025741;22026535;
EnSpm3_PT_34536	Chr02	22040413	22043888	cluster50674;cluster50675;	22041568;22042218;	22041969;22042473;
EnSpm3_PT_34539	Chr02	22045984	22049196	cluster50681;	22047017;	22047566;
hAT-5_PTr_34563	Chr02	22107575	22107716	cluster50725;	22107572;	22107851;
EnSpm3_PT_34577	Chr02	22121391	22121699	cluster50735;	22121487;	22123500;
ENSPM1_PT_34578	Chr02	22121730	22124124	cluster50735;	22121487;	22123500;
ENSPM1_PT_34591	Chr02	22140398	22140825	cluster50743;	22140362;	22141422;
EnSpm3_PT_34612	Chr02	22167963	22173945	cluster50770;	22170657;	22173331;
Helitron-N3_PTr_34623	Chr02	22191111	22191185	cluster50784;	22191101;	22191561;
Gypsy-30_PTr-LTR_34628	Chr02	22204540	22204731	cluster50790;	22204619;	22204782;
Helitron-N4_PTr_34662	Chr02	22250847	22250927	cluster50827;	22250858;	22250929;
Helitron-1_PTr_34670	Chr02	22289260	22289378	cluster50846;	22289176;	22289368;
Copia-69_PT-I_34674	Chr02	22295762	22296133	cluster50853;	22295767;	22296046;
Ogre-PT1_I-int_34752	Chr02	22472174	22474395	cluster50968;	22473927;	22474009;
Ogre-PT1_I-int_34755	Chr02	22476123	22476408	cluster50972;	22476278;	22476453;
Copia-73_PT-I_34764	Chr02	22480430	22484620	cluster50983;	22483002;	22483078;
Copia-84_PT-I_34772	Chr02	22489695	22492179	cluster50993;	22490064;	22490537;
ENSPM1_PT_34843	Chr02	22616066	22624949	cluster51087;	22616062;	22620061;
Ogre-PT2_LTR_34849	Chr02	22633107	22635465	cluster51095;	22634636;	22634750;
GYPOT1_LTR_34871	Chr02	22674177	22674468	cluster51120;	22674342;	22674380;
Helitron-1_PTr_34873	Chr02	22684564	22684673	cluster51124;	22684549;	22684664;
Gypsy-73_PTr-LTR_34890	Chr02	22721963	22722348	cluster51148;	22722140;	22722402;
PTr-3_34960	Chr02	22841192	22841385	cluster51280;	22841191;	22841386;
SINE2-2_PTr_34961	Chr02	22841815	22841974	cluster51281;	22841581;	22842018;
Copia-3_PTri-I_34996	Chr02	22927794	22927871	cluster51333;	22927791;	22928090;
Copia-3_PTri-I_34997	Chr02	22927872	22928085	cluster51333;	22927791;	22928090;
hAT-3_PTr_35016	Chr02	22998728	22998878	cluster51372;	22998728;	22999089;
hAT-1N_PTr_35017	Chr02	22998942	22999089	cluster51372;	22998728;	22999089;
Gypsy10-PTR_I-int_35068	Chr02	23126976	23128642	cluster51447;	23127041;	23127219;
Gypsy-28_PTr-I_35080	Chr02	23144053	23148334	cluster51466;cluster51468;	23146809;23147639;	23146973;23147908;
DNA-3-2B_PTr_35095	Chr02	23174613	23174896	cluster51487;	23174678;	23174827;
DNA-3-3_PTr_35114	Chr02	23209479	23209855	cluster51515;	23209481;	23210343;
DNA-3-3_PTr_35115	Chr02	23209896	23210349	cluster51515;	23209481;	23210343;
DNA-3-1_PTr_35122	Chr02	23236755	23237704	cluster51527;	23236682;	23237705;
DNA-3-1_PTr_35163	Chr02	23355702	23356271	cluster51608;	23355710;	23356538;
DNA-3-1_PTr_35164	Chr02	23356299	23356540	cluster51608;	23355710;	23356538;
SINE2-2_PTr_35165	Chr02	23357314	23357485	cluster51610;	23357233;	23357483;
Helitron-N3_PTr_35173	Chr02	23381254	23382079	cluster51624;	23381313;	23381543;
Helitron-N3_PTr_35181	Chr02	23404145	23405066	cluster51636;	23404223;	23404483;
Ogre-PT3_LTR_35187	Chr02	23416831	23418416	cluster51649;	23417692;	23418386;
Helitron-N2_PTr_35237	Chr02	23568775	23569987	cluster51743;	23569100;	23569363;
Helitron-N3_PTr_35243	Chr02	23589982	23591806	cluster51760;	23591432;	23591576;
Copia-91_PTr-LTR_35259	Chr02	23686223	23686865	cluster51801;	23686268;	23686721;
hAT-5_PTr_35261	Chr02	23687955	23688054	cluster51802;	23688004;	23688073;
SINE2-1_PTr_35262	Chr02	23694191	23694386	cluster51807;	23694191;	23694381;
hAT-6_PTr_35267	Chr02	23708850	23709082	cluster51816;	23708751;	23709005;
hAT-1N_PTr_35283	Chr02	23728160	23728311	cluster51831;	23728053;	23728269;
Helitron-1_PTr_35284	Chr02	23730167	23731012	cluster51832;	23730282;	23730390;
Helitron-N2_PTr_35373	Chr02	23968921	23970139	cluster51986;	23969028;	23969131;
Copia19-PTR_I-int_35392	Chr02	24037915	24038481	cluster52033;	24038349;	24038384;
Gypsy7-PTR_LTR_35432	Chr02	24150305	24150659	cluster52094;	24150325;	24150561;
Copia-3_PTri-I_35446	Chr02	24162604	24162815	cluster52108;	24162572;	24162872;
Ogre-PT2_I-int_35476	Chr02	24243482	24245088	cluster52173;	24243988;	24244109;
hAT-5_PTr_35477	Chr02	24249893	24249972	cluster52182;	24248632;	24250161;
hAT-5_PTr_35478	Chr02	24250085	24250168	cluster52182;	24248632;	24250161;
SINE2-1_PTr_35490	Chr02	24287763	24287916	cluster52202;	24287760;	24287859;
DNA-3-3_PTr_35608	Chr02	24603357	24604131	cluster52395;	24603353;	24604126;
hAT-1N_PTr_35637	Chr02	24669422	24669703	cluster52426;	24669550;	24669699;
SINE2-1_PTr_35693	Chr02	24805179	24805347	cluster52532;	24805181;	24805392;
Gypsy18-PTR_LTR_35707	Chr02	24847602	24848202	cluster52559;	24847563;	24849427;
Copia5-PTR_LTR_35708	Chr02	24848205	24848467	cluster52559;	24847563;	24849427;
Gypsy18-PTR_LTR_35709	Chr02	24848458	24849332	cluster52559;	24847563;	24849427;
Copia51-PTR_I-int_35807	Chr02	25051379	25053751	cluster52702;	25051143;	25051943;
Gypsy-25_PTr-I_35829	Chr02	25127386	25129278	cluster52775;	25128781;	25128876;
Gypsy-26_PTr-LTR_35858	Chr02	25156067	25156272	cluster52801;	25156135;	25157089;
POPGY2_LTR_35859	Chr02	25156278	25157780	cluster52801;cluster52802;	25156135;25157197;	25157089;25157755;
hAT-3_PTr_35866	Chr02	25164173	25164335	cluster52809;	25164233;	25164478;
hAT-1N_PTr_35867	Chr02	25164343	25164537	cluster52809;	25164233;	25164478;
Gypsy-25_PTr-LTR_35884	Chr02	25181835	25183249	cluster52824;	25182438;	25182562;
Gypsy-76_PTr-LTR_35904	Chr02	25203569	25203738	cluster52832;	25202857;	25203903;
Gypsy-73_PTr-LTR_35930	Chr02	25242433	25242641	cluster52872;	25242454;	25242502;
Copia-92_PTr-I_35990	Chr03	89978	94020	cluster52956;	93159;	93379;
Helitron-N3_PTr_36011	Chr03	131783	131953	cluster52994;	131751;	131879;
Copia-92_PTr-I_36015	Chr03	137024	137592	cluster52996;	137472;	137592;
Copia-84_PT-I_36023	Chr03	143292	147542	cluster53006;	146207;	146359;
SINE2-2_PTr_36045	Chr03	240430	240578	cluster53055;	240435;	240677;
Gypsy-79_PTr-LTR_36049	Chr03	243524	244135	cluster53058;	243539;	245155;
Gypsy-73_PTr-LTR_36050	Chr03	244134	244844	cluster53058;	243539;	245155;
DNA-3-2B_PTr_36051	Chr03	244798	244898	cluster53058;	243539;	245155;
SINE2-2_PTr_36069	Chr03	293869	294016	cluster53081;	293870;	294077;
Copia-3_PTri-I_36109	Chr03	404614	404728	cluster53172;	404570;	404758;
Helitron-N3_PTr_36128	Chr03	433344	434759	cluster53198;cluster53199;	433356;433790;	433431;434193;
Helitron-N4_PTr_36138	Chr03	459072	459211	cluster53213;	459070;	459879;
Helitron-N4_PTr_36139	Chr03	459327	459484	cluster53213;	459070;	459879;
Helitron-N4_PTr_36140	Chr03	459508	459682	cluster53213;	459070;	459879;
Helitron-N4_PTr_36141	Chr03	459686	459750	cluster53213;	459070;	459879;
Caulimovirus-1_PTr_36159	Chr03	527867	535765	cluster53261;	529402;	529787;
Ogre-PT1_I-int_36175	Chr03	584467	587061	cluster53303;	586274;	586543;
Ogre-PT1_I-int_36178	Chr03	588800	589165	cluster53308;	588880;	589630;
Ogre-PT3_I-int_36179	Chr03	589168	589756	cluster53308;	588880;	589630;
Copia-84_PT-I_36220	Chr03	722240	726489	cluster53394;cluster53396;	723331;724303;	723419;724436;
SINE2-2_PTr_36239	Chr03	752438	752607	cluster53419;	752442;	752574;
Ogre-PT2_I-int_36291	Chr03	875297	875624	cluster53483;	874766;	876021;
Copia-56_PTr-I_36312	Chr03	908935	909925	cluster53505;	909317;	909538;
Ogre-PT2_I-int_36334	Chr03	951037	963315	cluster53526;cluster53532;	953880;955910;	954195;956350;
Copia-56_PTr-LTR_36341	Chr03	971173	971318	cluster53545;	971231;	971337;
ENSPM1_PT_36347	Chr03	975368	977287	cluster53549;	975197;	978297;
Ogre-PT3_LTR_36348	Chr03	977288	977834	cluster53549;	975197;	978297;
Gypsy-71_PTr-LTR_36349	Chr03	977585	977841	cluster53549;	975197;	978297;
Ogre-PT3_LTR_36350	Chr03	977842	978286	cluster53549;	975197;	978297;
Gypsy-73_PTr-LTR_36371	Chr03	1003044	1003714	cluster53565;	1003038;	1003610;
Copia-56_PTr-I_36375	Chr03	1007039	1011722	cluster53573;	1010521;	1010591;
Gypsy-71_PTr-LTR_36391	Chr03	1028091	1028278	cluster53593;	1028208;	1028270;
Gypsy-71_PTr-LTR_36392	Chr03	1028231	1028294	cluster53593;	1028208;	1028270;
ENSPM1_PT_36408	Chr03	1039471	1042554	cluster53611;	1042192;	1042245;
ENSPM1_PT_36414	Chr03	1051471	1051893	cluster53619;	1051533;	1052093;
Copia-56_PTr-I_36424	Chr03	1058971	1060740	cluster53627;	1059340;	1059649;
Ogre-PT1_I-int_36451	Chr03	1077204	1089035	cluster53650;	1085330;	1087312;
Copia-56_PTr-I_36464	Chr03	1095007	1095842	cluster53661;	1095726;	1095824;
EnSpm3_PT_36493	Chr03	1131711	1132117	cluster53698;	1131779;	1131888;
Gypsy-79_PTr-LTR_36494	Chr03	1132131	1132750	cluster53699;	1132031;	1132331;
Gypsy-71_PTr-LTR_36495	Chr03	1134924	1135369	cluster53701;	1135009;	1135337;
Gypsy-71_PTr-LTR_36497	Chr03	1137058	1137169	cluster53703;	1136828;	1138195;
Gypsy-30_PTr-LTR_36498	Chr03	1137335	1138263	cluster53703;	1136828;	1138195;
Gypsy-26_PTr-LTR_36586	Chr03	1246459	1246890	cluster53795;	1246485;	1246717;
Gypsy13-PTR_LTR_36609	Chr03	1283962	1286667	cluster53830;	1285978;	1286644;
ENSPM1_PT_36620	Chr03	1312361	1315037	cluster53850;	1312810;	1312882;
Gypsy13-PTR_I-int_36634	Chr03	1332842	1334750	cluster53882;	1334388;	1334763;
SINE2-1_PTr_36643	Chr03	1340620	1340815	cluster53888;	1340621;	1340802;
hAT-3_PTr_36663	Chr03	1383421	1383843	cluster53906;	1383482;	1383829;
Helitron-N1_PTr_36664	Chr03	1400763	1401136	cluster53908;	1400762;	1401279;
Helitron-N2_PTr_36665	Chr03	1401176	1401253	cluster53908;	1400762;	1401279;
Ogre-PT2_LTR_36677	Chr03	1410180	1412847	cluster53914;	1412188;	1412834;
ENSPM1_PT_36701	Chr03	1441945	1444677	cluster53946;	1442768;	1443292;
EnSpm2_PTr_36708	Chr03	1473647	1480976	cluster53982;	1478541;	1479421;
EnSpm2_PTr_36710	Chr03	1484535	1484939	cluster53990;	1484671;	1485267;
Ogre-PT3_LTR_36745	Chr03	1556144	1556900	cluster54069;	1556202;	1556824;
Gypsy-74_PTr-LTR_36775	Chr03	1608879	1608998	cluster54114;	1608586;	1609229;
DNA-3-1_PTr_36814	Chr03	1670133	1670666	cluster54169;	1669989;	1670663;
Ogre-PT2_LTR_36816	Chr03	1677971	1678457	cluster54177;	1677983;	1678810;
Copia43-PTR_I-int_36817	Chr03	1678441	1678539	cluster54177;	1677983;	1678810;
hAT-4_PTr_36831	Chr03	1695391	1695845	cluster54198;	1695360;	1696110;
Copia19-PTR_LTR_36840	Chr03	1713037	1713342	cluster54213;	1712941;	1713984;
Gypsy-79_PTr-LTR_36841	Chr03	1713539	1714341	cluster54214;	1714152;	1714329;
ENSPM1_PT_36844	Chr03	1727921	1730611	cluster54223;	1730007;	1730038;
Gypsy13-PTR_I-int_36859	Chr03	1748567	1750475	cluster54243;cluster54245;cluster54246;	1748636;1749326;1750113;	1748813;1749996;1750488;
Gypsy-73_PTr-LTR_36860	Chr03	1750476	1751953	cluster54247;cluster54248;	1750665;1751205;	1751062;1751404;
ENSPM1_PT_36893	Chr03	1806495	1809176	cluster54282;	1807316;	1807357;
Gypsy-28_PTr-I_36936	Chr03	1880024	1880442	cluster54334;	1879984;	1880264;
Helitron-3_PTr_36960	Chr03	1955070	1955243	cluster54389;	1953461;	1957181;
Helitron-3_PTr_36961	Chr03	1955493	1956413	cluster54389;	1953461;	1957181;
Helitron-2_PTr_36962	Chr03	1956733	1956916	cluster54389;	1953461;	1957181;
Copia-80_PT-I_36966	Chr03	1968086	1969560	cluster54391;	1968754;	1968797;
Gypsy-71_PTr-LTR_37097	Chr03	2220399	2221155	cluster54627;	2220879;	2220969;
hAT-5_PTr_37107	Chr03	2248750	2248893	cluster54659;	2248593;	2248955;
Copia27-PTR_I-int_37109	Chr03	2250988	2252650	cluster54662;	2251408;	2251554;
Copia27-PTR_I-int_37110	Chr03	2252806	2255072	cluster54665;	2254719;	2255056;
DNA-3-3_PTr_37120	Chr03	2302130	2302805	cluster54698;	2302239;	2302799;
ENSPM1_PT_37159	Chr03	2394676	2398068	cluster54766;	2397203;	2397573;
Gypsy-29_PTr-I_37170	Chr03	2415292	2415989	cluster54783;	2415789;	2415864;
Gypsy-74_PTr-LTR_37172	Chr03	2418486	2418609	cluster54787;	2418476;	2418696;
Gypsy-29_PTr-I_37173	Chr03	2418795	2419458	cluster54788;	2418956;	2419011;
Gypsy-27_PTr-I_37175	Chr03	2420530	2422808	cluster54794;	2422325;	2422456;
Gypsy-27_PTr-LTR_37177	Chr03	2426086	2427156	cluster54799;	2426734;	2427155;
Gypsy-29_PTr-I_37180	Chr03	2427689	2428493	cluster54801;	2428029;	2428093;
Copia-3_PTri-I_37185	Chr03	2434228	2434389	cluster54808;	2434197;	2434559;
Gypsy-71_PTr-LTR_37200	Chr03	2458998	2459682	cluster54830;	2459157;	2459758;
Gypsy-30_PTr-LTR_37206	Chr03	2465248	2465330	cluster54835;	2465097;	2465361;
DNA-3-1_PTr_37227	Chr03	2516855	2517385	cluster54865;	2516851;	2517663;
DNA-3-1_PTr_37228	Chr03	2517416	2517662	cluster54865;	2516851;	2517663;
Helitron-N4_PTr_37243	Chr03	2559863	2561775	cluster54885;	2560839;	2561053;
Copia43-PTR_I-int_37261	Chr03	2608569	2609335	cluster54903;	2608704;	2608808;
Gypsy-79_PTr-LTR_37269	Chr03	2621748	2622335	cluster54921;	2621797;	2621838;
hAT-5_PTr_37270	Chr03	2622740	2622904	cluster54922;	2622688;	2622881;
Helitron-N4_PTr_37272	Chr03	2623676	2623737	cluster54923;	2623666;	2623711;
SINE2-1_PTr_37292	Chr03	2650244	2650446	cluster54943;	2650235;	2650519;
ENSPM1_PT_37307	Chr03	2703237	2704621	cluster54973;	2703238;	2703589;
Copia-83_PT-LTR_37317	Chr03	2721763	2722441	cluster54990;cluster54991;	2721805;2722384;	2722198;2722439;
Helitron-N4_PTr_37350	Chr03	2814495	2816503	cluster55072;	2814671;	2814825;
SINE2-2_PTr_37356	Chr03	2822034	2822147	cluster55082;	2822032;	2822189;
Helitron-N3_PTr_37363	Chr03	2852116	2852599	cluster55102;	2852194;	2852661;
Helitron-N3_PTr_37368	Chr03	2857312	2857955	cluster55112;	2857651;	2857815;
Helitron-N3_PTr_37375	Chr03	2868833	2869644	cluster55119;	2869348;	2869428;
Helitron-1_PTr_37383	Chr03	2875689	2875833	cluster55124;	2875638;	2875813;
Helitron-1_PTr_37384	Chr03	2876329	2876471	cluster55125;	2876391;	2876439;
Copia-91_PTr-LTR_37393	Chr03	2891719	2891773	cluster55135;	2891713;	2891813;
Gypsy-79_PTr-LTR_37406	Chr03	2907520	2907960	cluster55155;	2907687;	2907905;
L1-2_PTr_37425	Chr03	2925786	2927119	cluster55178;	2926648;	2926891;
Copia-54_PTr-LTR_37515	Chr03	3074828	3074992	cluster55291;	3074734;	3079435;
Copia-54_PTr-I_37516	Chr03	3074993	3079399	cluster55291;	3074734;	3079435;
Copia-61_PT-I_37544	Chr03	3125558	3129576	cluster55331;	3127189;	3127416;
Copia-93_PTr-I_37546	Chr03	3130413	3132553	cluster55333;	3130506;	3133003;
Copia-93_PTr-LTR_37547	Chr03	3132554	3132925	cluster55333;	3130506;	3133003;
Helitron-1_PTr_37571	Chr03	3171105	3171233	cluster55378;	3171157;	3171244;
ENSPM1_PT_37577	Chr03	3188361	3189381	cluster55392;	3188551;	3188613;
Helitron-N1_PTr_37616	Chr03	3224651	3224914	cluster55425;	3224442;	3224829;
EnSpm1B_PT_37627	Chr03	3234572	3234941	cluster55434;	3234555;	3234652;
ENSPM1_PT_37635	Chr03	3266679	3275403	cluster55449;cluster55450;	3271306;3272429;	3272319;3276055;
Gypsy21-PTR_LTR_37636	Chr03	3275427	3275804	cluster55450;	3272429;	3276055;
Copia14-PTR_I-int_37645	Chr03	3293876	3295727	cluster55469;	3294465;	3295650;
Helitron-N3_PTr_37654	Chr03	3308322	3308807	cluster55484;cluster55485;	3308366;3308586;	3308459;3308689;
ENSPM1_PT_37678	Chr03	3332222	3336272	cluster55508;	3332136;	3340923;
ENSPM1_PT_37679	Chr03	3336276	3341145	cluster55508;	3332136;	3340923;
Copia-56_PTr-I_37681	Chr03	3341793	3342961	cluster55511;cluster55512;	3341914;3342618;	3342367;3342839;
Gypsy-78_PTr-I_37686	Chr03	3350794	3355802	cluster55531;	3354779;	3354863;
hAT-3_PTr_37688	Chr03	3358527	3358691	cluster55535;	3358048;	3359379;
[truncated: 7,495 more rows]
