# Supplementary material for: Transposon-associated small RNAs involved in plant defense in poplar
Source: Research Square preprint supplement (doi:10.21203/rs.3.rs-154563/v1), 2021-02-11
Supplement: Supplementary file 4 [file b5983e226633c24351db4bd3.xlsx]

## Sheet: Sheet1
Data S6. The predicted novel miRNAs.
miRNA	Score total	mature sequence	star sequence	GenomeID	strand	start	end	pre_seq	hairpin structure	hairpin energy
ptc-miR6612	0.5	uuacugagaaaauuuugagauc	uccaagauuugauuauauuguuauc	scaffold_79	-	31234	31483	ggagaagcccuuauaaaugcuuggauuacugagaaaauuuugagaucccuagauccaagauuugauuauauuguuaucacuauugaagaguccaaauuaguggauaaguugacgauggaugagcuuauggguuccuuacaagcucauaaauaaaauauuugugaaaagaaaaagagauaaggcaauagagcaugccuuacaauuaaaauuaucucccaacaaagauagauaugaauaggaagggacucca	((((...(((((......((((((((.(((((..((((((((.((((....))))))))))))..)))....)).))).((((((..(((((((......)))))...))..))))))..(((((....)))))....)))))(((((((((...))))))))).............(((((((........))))))).........((((((........))))))...........))))).)))).	-56.8	441.861	285.052	492.355
ptc-miR6521	19.7	aacuuggacaaucacugaucu	uuuuagggauauguuugaucu	scaffold_61	-	128445	128694	guuuucagggaaaauaauuuaaacgaaaaaagaaauugaagaauggauaaaaauguaaaacuaaauaugauaaauuuaaauaugguuugcugcugcuaccugcaugagaugucucuucaucauugucaucaccgucaaccucgauuuuagggauauguuugaucuugggccaaucuucuccuguuccccuucgacacuuuuugcucaaacuuggacaaucacugaucucaagauuuugaaguuucuuuaa	((((((...)))))).............(((((((((((.(((.(((((........((((((.((.(((.....))).)).)))))).((..(((.....)))..)).))))).))).)))............((((.((.((..((((.(((.(((((((..((((((.((..........................)).))))))..)))))))))).))))..)).))...)))).))))))))..	-34.9	6.78741	3.69398	16.3699
ptc-miR6581	1.2	uccgugaucaacugauaacucagc	accgucaucaggugauuauaggga	Chr16	+	4841421	4841670	caggaaaguguuuuccuuuccuuauucuaaggaaaacacuuuccuuuccuuuguucacaaaacguguaccgucaucaggugauuauagggauugaaggaauugguggauaagacgaacauaacugggaaaaaaaaggauucuucuucuucaucacagcagagaagaagagaaggagguaugguuucgccaucgccaucacauacuccgugaucaacugauaacucagcaagagaucugcgaucuggggac	.(((((((((((((((((..........))))))))))))))))).(((((.(.((.((.....(((...((.(((((.(((((((.((((((((.((...(((((((.........((((.((..............((((.(((((((.((......)))))))))))))..)).))))..)))))))...)).))).)).))).))))))).))))).))...))).......)).)).).))))).	-72.6	14.9323	9.8506	3.77766
ptc-miR6562	99.2	gauuagucgagaugcguguaagcu	acuuauaugaucguuaacuuuaga	Chr15	+	9852708	9852957	auaauuuauuuuuuauauuaacaaauaaaaaaaaucuaaaaacacuaaaaauaaaaaacauaguuaaauuaaaauuacaaauauuaagggauguaguucaacuauucagaccuuggguuugcuuuuuaauagucacuaguuugagugucacaaaucucagagccacugaaaacuuauaugaucguuaacuuuagagucuuagaagauuagucgagaugcguguaagcuggcuccaacguuauaauuaaaa	........((((((((........)))))))).........(((((.........((((.((((...(((((((...(((((..(((((..((((((...))))..))..))))).)))))..)))))))....)))))))).)))))...........((((((.......(((((((((((.((.(((....(((((....)))))))).))))).)))))))).)))))).................	-39.9	103.847	66.4916	52.8873
ptc-miR6604a	1.7	uguuuggaggaagagagaauu	aucuuugaucgacccagauggc	Chr03	-	3571676	3571925	ggucuggucguuguuauggguguuuggaggaagagagaauuggucucuuggagauccaaucuuugaucgacccagauggcauuuccuugagacauuggguggacaguaguaauuguugugaguggccugagaucgagugugaucacacuacaaggcgagugauccaacucucucuuaguggagaaagggaugagagcuugggcgauuggguucucaacgcaucuuuguuucagccuuucaaagaauugca	.(((((.(((.((((..((((((((((..((..(((((.((((((((...)))).)))))))))..))...)))))))......)))...)))).))).)))))....((((((.((.((((.(((.((((((.(((((((.((.(((((..(((.((((......)))))))..)))))))........(((((((((((....))))))))))).)))).))).))))))))).)))))).)))))).	-77.8	9448.76	8464.75	7050.38
ptc-miR6590a	35221.5	ucuucucugauaauaugcuuc	agcauauuaucagagaagagg	Chr03	+	4847110	4847359	cagagaagaggauggugaaagggaaauaauuccagcuuugaagcauauuaucagagaagaggaugggaagccaggagacucuggaauuauuucccucuccccauccucuucucugauaauaugcuucaauucacugcaauuacuuaugucaaggguuuccagcuuuggcagacuuugagugagggacggugugaagauaaauaucaguuugucgagagaauucaaauccagaagaacaagacuuuggagg	(((((....((((..((((..((((....))))....((((((((((((((((((((((((((((((.......((((....((((....)))).))))))))))))))))))))))))))))))))))..((((((..(((((((((((((((........)))))))).....)))))))..).)))))....(((((((....))))))).......)))).))))............)))))....	-92.6	11400.1	8309.6	6704.09
ptc-miR6544	367.5	auuuguggucguuagaugugu	caccuauauuuaagaaauugcaa	Chr11	+	718227	718476	cauugaagcuauucuuucccucuagguuuucagcgaugaaaauguugagauuuaccucguuuucacugccacgcuccuuggagagacuagauuuaaguggaacuccaauucgagcucuuccagaaagcaucaaggaucuugguuugcuuagacaccuauauuuaagaaauugcaaaaugcuucaggcacucccagagcuuccaucccauuuguggucguuagauguguccuuuugcuauuuacuguaaag	..(((((.(((.(((((((....(((......(((.(((((((...(((......)))))))))).)))......))).))))))).))).))))).((((((((......)))...)))))..((((((((((...)))))..))))).(((((....((((((...((((((((..((((..((....))..))))..........))))))))..))))))))))).((((((........))))))	-52.2	170.364	209.325	173.772
ptc-miR6637	2.8	uuuguugaaguucucuuuguc	aaaagaagcucaggcuaggu	Chr08	-	3753570	3753819	cucggguuugacagcgaguugcugaguaagacgccgaguuaacccagcgagaaagucguccucgucgcugcucucugucucgguggaggaacccauacuggacucuacaggggagcugagagcggaaggcgagccgagagagucaaacucguaagggaacucggaaaagaagcucaggcuagguuucaacucaguguugaaacaaauuuuguugaaguucucuuuguccaugaguaacuuuuccuuagua	..((((((((((......((((((.((..(((.....))).)).)))))).....(((..((((((.((((((((.(((((.((((((...((......)).))))))..)))).).))))))))..)))))).)))....))))))))))(((((((((((((((((((((((..(((...((((((((.....)))))))).......)))..)))).))))).)))..)))).....)))))))...	-87	10.1811	12.3133	13.8514
ptc-miR6634	0.3	uuuggggacuaaacuguaauu	cuacuguucucuccaaauu	Chr15	-	13069030	13069279	caaucuguaauuuuccaaaguuuggggacuaaacuguaauuuccacaaauugagggaccaaauugaauuuucgucaucuucaaccuccaacccagaauuuuaacagaaaccuacuguucucuccaaauuucuaacacaauuucaccauucaaacaaaaucauaacucaaaaucaucaucuuucaauucaaucucucaaaaucauccaaauaaucaaauacccacaacaauuaacucuauaacauucaaau	.................(((((((((((...(((.(((.((((...(((((..(((......(((((...........))))).......)))..))))).....))))..))).))).)))))))))))........................................................................................................................	-21.3	2615.19	1158.06	1310.85
ptc-miR6599a	0.9	uggguuuguguuucuaaugau	cuuggaaagacuacuaua	Chr14	-	776364	776613	gagacagauuccuugcuugaaagcucagaaguuguaguaggaagggaggaugaugucucuaaaguuaugaaauugcugauuggcucgaucggucaacaaguucugucuguugucccuauuguggggauggcaggucuuggaaagacuacuauagcaaaaaaaguuugugaaguggugacggagaaaaagcuuuuugauguaauaauauggguuuguguuucuaaugauuuuaguaaacggaggauuuuag	((((((...(((((.(((....(((((.....)).)))...))).)))))...))))))........(((((((((((((((...)))))))).......((((((((((((((((((...))))))))))))((((((((((.((..((((((((.(((((((((......((....))......)))))))))..))).....)))))....)).))))))).)))........))))))))))))).	-67.3	293.895	350.928	386.581
ptc-miR6534a	0.7	aguuguuggaaauugucuuaucuu	uagauucugacuucucuuuug	Chr04	+	11219025	11219274	gugagcaggugguccucauaaaaguuguuggaaauugucuuaucuuuccacccaccaaauuugaugucauuuugccuucuagaacucuagcuaaagguaaaauguugagcaguguuugggcuggauugcaggauagauucugacuucucuuuuguggccaagcuuugaauuugaaaauugcagauuugggucuuacacuuuaaugaaaauuauaggccuauuucuuagcuuucuagccauauaaaccaaa	..((((...((((...((((((((..(((((((.(((((((..(..((((((((......(((....(((((((((((((((....))))...))))))))))).....)))....)))).))))..).))))))).)))))))....)))))))))))).))))................(((..(((((((....................)))))))..)))..(((....))).............	-64.6	35.9733	21.5482	31.4805
ptc-miR6556	1.4	gacaaaaauggcauaagagagg	gcuuggugucaguuauugugcg	Chr05	+	24651494	24651743	gccagucucgcccauauuguuaauuugcucugauaaggcuggugcaauucacugaaaugagcuacguucuuguuuucuuuuuuaaagauguuuauaauuugcucccucucaaaaaggggagggguucuuuguuagguggaaagaagacaagaacaugcugcuuggugucaguuauugugcgcuauugauggaugggaucggcaggggacaaaaauggcauaagagagguacagugggaggcaggagaaag	.((.((((((((((..((((((........))))))...))).))...((((((...........(((((((((((((((((((((((............((.(((((((......)))))))))))))))......))))))))))))))))).((((.(((.((((((....((((.(.((.(((((.......))))).)).).))))...))))))..))).))))))))))))))).))......	-74.7	22.3985	8.00362	110.811
ptc-miR6552a	5.2	cugcucgcaagucggaggccu	gccuccgucuuccgagccggg	Chr08	+	19139645	19139894	acggcggcgguggccgcugccccugcucgcaagucggaggccuggcugacguggcuggugcggaccgccgagcuuggggauugcgaggagagcucuacgcuggcgugggcguggcauuaaauugccgugcgcgcgcccaugcguuggcucuccuugcaauccccgaccucguggcgugaugugcccgcugccgaggccuggccuccgucuuccgagccggggcugacagccccccgcaugauuguccccg	...((((.((.(((.((.(((((.(((((.(((.((((((((.((((...(((((.((((((...(((((((.(((((((((((((((((((((..((((.((((((.((((((((......)))))))).))))))...)))).))))))))))))))))))))).)))..))))...)))))).)))))...)))).)))))))).))).))))).))))).).).))))))))).............	-167.8	1112.46	1483.75	2445.41
ptc-miR6519b	0.4	aaccgaaccgaaccgugaacaccc	guuuaggagugugauagc	Chr06	+	12151178	12151427	guugguuuuuuuagucuaaaccaaaccgaaccgaaccgugaacaccccuacuuuccguacauguaauuuuauguucuaaggggguguuuaggagugugauagcgguuguacuucaaaguguuuuucauuugaaaauauaucaaaauaauauauuuuuuauuuuuuaaaaauaauuuuuaauaucagcacaucauaauaauuuuaaaacauaaaaaaacuaauuuuuaaaauauauuuaauuuuuuuaaaa	(((((((((((((((........(((((......(((.((((((((((..(((.....(((((......)))))...))))))))))))).).)).......)))))........(((((.....)))))((((((((((.......))))))))))......(((((((...)))))))..........................)).)))))))))))))((((((((............))))))))	-44.8	35.2946	25.2422	21.4068
ptc-miR6588	0.5	ucuuaagacuuaacucaugacauc	gaucauguuuuaucguaacaaggaua	scaffold_29	+	104322	104571	auauguugauuauauauauauaucuuaagacuuaacucaugacaucaaucaaaugaggaguuaucaauucaaaagucaauucaaaauauauauugguucauaucaagaauucagauucaacaauugaucauguuuuaucguaacaaggauaauaaucaacauauauauauauauauauauauauauauauauauauauauauauauauauauauauauauaugauucgaaaggaaacaauacucaaaagc	(((((((((((((.......((((((...((.(((..(((((..(((((....((..(((((...(((((..........((((........))))..........)))))..)))))..))))))))))))..)))..))....))))))))))))))))))).(((((((((((((((((((((((((((....))))))))))))))))))))))))))).(((.....)))...............	-55.2	14.9323	10.4663	6.2961
ptc-miR6532	1.2	aggauuggagggaauuaaaca	cuuaauuuucuccaauaccuca	Chr12	+	13353060	13353309	uugucaugcagaguuuuaugugaggauuggagggaauuaaacagaacgaaacuuuuugaguauuuuuuuugcuuaauuuucuccaauaccucauguucagcuugucauucauguguaucauaauuuauuuauuuuuaauuucuaguuucuuccaauaucuuuaugcauggcauucauacaugauaucugcagugcaaaaugcucggaaauugauguaaugugugguauguggaugugaggauuggaggaa	.....(((..(((((..(((((((((((((((((((((((.(((((.(((((((...)))).))).))))).))))))))))))))).))))))))..)))))..)))......................................((((((((..(((((((((((((.(((.((((((((((.((((.(((.......))))))).))).)))).))).))).)))))....))))))))))))))))	-72	1.35748	3.69398	0
ptc-miR6561	0.6	gaugugcauugugcaauucaugau	cgugaagauaaaauacaauuc	scaffold_52	+	12572	12821	acauuuuugcaaagaaacaucgugcaaaacgauugaaagucugccacagaugugccagauggacuuguaauucaacaugucguucuuuaggaaugauaucuguaaaccgugaagauaaaauacaauucauuaaggauggccuaaguaaagggucuuuaaauaaucuucuauugacucuugagacgcauccuaauagagaugugcauugugcaauucaugauuuauggucauaauuccauaaagaacaugc	.((((((((((..((....)).))))))).........(((((.(((....))).))))).(((.(((......))).)))(((((((((((((.....(((((((.(((((((((((..((((.(((((((.(((((.........(((((((..((..........))..)))))))......))))))))).))).))))..)))).)..)))))).))))))).....))))).))))))))))).	-61.5	88.2364	71.4169	99.4784
ptc-miR6569	0.6	guuaaucgugugacuuguuccacc	cuugagggccuagcuguugug	Chr18	-	4082512	4082761	ugguugcaaauauauauuuaauuauagcaauuaggagucauucucacauuaaugugaaauagauccuacaaaagugagguauuagaagguuaauauuucaaaaguccaaaucaauaguccuacaugccuccucccuaccuggaauaaccuagguauggagcaauuaaagguuugaaaaauaauucacuugagggccuagcuguugugguuaaucgugugacuuguuccacccucgucccggguucgaccc	.(((((......((((......))))(((..(((((((((((.(((((....)))))))).)))..........(((((((((((....))))))))))).................)))))..)))...((((.(((((((......))))))).))))(((........)))...(((((.((((.(((.((((..((....))))))..))).)))).)))))..((((.......)))).))))).	-59.7	5.42993	4.30964	11.333
ptc-miR6566	0.7	gucucgaguucgagucaggacgug	aagaacuugagaucugcaua	Chr01	-	21939536	21939785	guugauguuuuuuguuuggaauauugcggacugcacccuauuauaaacagauuuuaauaacuauauuauguuuaaauuuauaauaaauauuuauuuuuuauaccuaaauaauugagggaugcuauugaacguguaucaguuaggaguuuccaaaagacguggugugaugacaaagaacuugagaucugcauagcaggucucgaguucgagucaggacgugcacuucuugugagucugagacauucggggu	..............(((.((((.((.((((((.(((..(((((((((.((((..(((((....))))).))))...)))))))))..((.((((((.........)))))).))..(((.(((....(((........)))...))).)))..((((.(((.(((..((((...(((((((((((((((...)))))))))))))))..))))..)))..))).))))))))))))).)).)))).))).	-64	569.464	581.801	533.91
ptc-miR6629	1.6	uuucgggaagugaaauuugga	caaauucacuucccaaaaaa	Chr14	+	10400573	10400822	uauauauauauauauauauauauauauauauauauauauauauauauauauauauauagagagagagagagagagagagagagagagaguaaugcuaucuuagcaagaucuuuuucccaaauucacuucccaaaaaauuucaaccaucggauuuaugugauuaacuagugugaucgacuugcaugaacucucauuggaugcuugaaaucuuucgggaagugaaauuuggaaagaauauuugauaagauug	(((((((((((((((((((((((((((....)))))))))))))))))))))))))))......................((((((((....(((((...)))))...))))))))(((((((((((((((.(((.(((((((.((((.((((((((((((((.(....)))))).....))))))......))).)))).))))))).))).)))))))).))))))).....................	-77.3	73.9828	103.431	141.033
ptc-miR6536	2.4	auagugggagugugguuaaac	ugaaccacacucccauuguuc	Chr02	-	23677450	23677699	ccaaaagggaugaguuuuggggaaguuccucaaaauuuuagaauuugcacugcugucccaugggaugacaauaccaaauggaucuuuugcuagaaaagugugcauucuacggcagcuaaaggggcggugauagugguaauccaaaaaauguugaaccacacucccauuguuccaccuuuguuuuuaauuuuugcaucaaaguauagaauagugggagugugguuaaacuuuuuuggagugucaauaccgu	......(((((((((((((((((...))))))))))))................)))))((((..(((((.(((((((((.(((((((.....))))).)).))))(((..((.(((.....))).))..)))))))).(((((((((.(((.(((((((((((((((((((...(((((................)))))....))))))))))))))))))).)))))))))))).)))))...))))	-84.1	2.03622	3.69398	7.55532
ptc-miR6635a	3.6	uuugguaacugaggaaacgug	cguuuccucaguuaccaaaca	Chr01	-	5755064	5755313	acgucuccaauaucuccacacaguagagaaugaauuaaauucacucuucauuguuuauuuuuacaaaaaugaacagcuacuguauggaggcagagaaaagcaacaugaaacugcuauggacugacuugcguuuaaagcacaaaacauggugggucccucaugaaauaaaucacguuuccucaguuaccaaacacuuguaaacaaguguuugguaacugaggaaacgugaaguaaccacacagugaaacac	...((((.....((((((.((((((((((.(((((...))))).)))...(((((((((((....)))))))))))))))))).))))))..)))).......(((((..((((((((...((...(((.......)))))...)))))))).....))))).......((((((((((((((((((((((((((((....)))))))))))))))))))))))))))).....................	-93.3	59.7293	65.8759	41.5543
ptc-miR6528	3286.7	accuaauuuuauuguaga	uuucaguaacuagcagcauc	Chr13	-	14833679	14833928	uucaaugaaugacugaaaaugauccaccgauccaauuagaauuuuguuauuuguccauaaguaaaauaaaauauucaaaucuuacuuuuuuuuuuauacacuuauuuuuucuauacauccaagagauucggauccuccuauauuuuaguauuuuaguaaaauuuuucaguaacuagcagcaucguggauagggaacuauccuagcgaccuaccuaauuuuauuguagaauuuucuggaucacgacuggac	...((((((...((((....((((....))))...))))...))))))....((((((((((...((((((....................))))))..)))))...(((((.........))))).((((((((...................((.((((((((.((((((.(((.....((((((((((....))))))..)))).....)))...)))))).))))))))))))))).))).)))))	-38.9	3628.55	3252.55	1819.57
ptc-miR6584	1162.2	ucgcaagucggaggccuggcu	ccuggccuccgucuuccaagc	Chr08	+	19158294	19158543	cggcgguggccgcugccccuacucgcaagucggaggccuggcugacgcggcuggugcggaccgccgagcugggggauugcgaggagagcuauacgcuggcgugggcguggcauuaaauugccgugcgcgugcccaugcguuggcucuccuugcaauccccgaccucguggcgugaugugcccgcugccgaggccuggccuccgucuuccaagccggggcugacagccccccgcaugauuguccccgucgu	(((.((.(((.((.(((((..((.(.(((.((((((((.((((...(((((.((((((...(((((((.(.((((((((((((((((((((.((((.((((((.((((((((......)))))))).))))))...)))))))))))))))))))))))).).)))..))))...)))))).)))))...)))).)))))))).))).).))..))))).).).)))))))).(((((.......)))))	-151.4	45.4757	59.1036	52.8873
ptc-miR6550a	10.1	cccacagcuuuauugaac	ucaagaaagcuguggaag	Chr18	-	14909682	14909931	ucuuugauccuguuuguaucuucccacagcuuuauugaaccgcagcaaaaaugaauacaaugucauauggucauggcauaucgcacaacaacaucaacauuaaucuaauaggugcaguucaagaaagcuguggaagaauacaaagagggucacguacaaccacaccaaaaauauauugagaagcuucaaagcucuccaugaaagggcuacauacaaacacaccuaaaaauagauucuaauagcuucaaag	....(((((((.((((((((((((.((((((((.((((((.(((.(......((....(((((...(((....((((.....)).))....)))..)))))..)).....).))).)))))).))))))))))))).))))))).)))))))...........................((((((....((((((.......))))))..............(((....)))........))))))....	-64.4	0	3.69398	1.25922
ptc-miR6632	12.6	uuugagcuguuauucugguuuggc	caacggucggauuaaaaguua	Chr19	-	13784382	13784631	aauuuaaaaauagcaugaaaucucaaaauaauaagaaaaaucauaaaaacuaguaaaaccgggaucccggggugagauuugugaaaucuaaagaucggaugguccguauagcaacauagagacaaauucaaaggaaaacgaccuccguaaucuccuguaaaaauuugauagugauccaacggucggauuaaaaguuaugauauuuuugagcuguuauucugguuuggcguugcuagaccuccucuuguac	.............(((.((((((((.........((....))................((((....))))..))))))))))).......((((..(((.((((....(((((((.......((((((...((((..(((.....)))....)))).....))))))........((((...(((((.(((.((((..((....))..)))).))).))))).)))).))))))))))))))))))....	-47.1	10.1811	11.6976	5.03688
ptc-miR6531	0.5	aggacgugcaccucuuguaagagu	ucucaaggggcguggcgugauga	Chr05	+	7772393	7772642	uaaaagaaaaaaaagaaacaaaucaaguuaauuauacaacccacuaaauuuaugaccuaaauugaguuuauuaaaacucuuuguuauaaaauaaaauuuaaaaaauuuaaaaauuauauuacaauaaaucccagaggcgucucaaggggcguggcgugaugacaaagggcuugagaucugcacagcaggucucgaguucgauuuaggacgugcaccucuuguaagagucuaggacaguugguguuuuacu	.........................................((((((.((((((((....(..((((((....))))))..)))))))))((((..((((((...))))))..))))...........(((...((((.((((((((((.(((.(((..(((....(((((((((((((((...)))))))))))))))...)))..)))))).)))))))..))))))).)))...)))))).......	-58.6	442.539	383.558	318.583
ptc-miR6565a	0.5	gguuugauauaaaguagg	uauuuuuucugccac	scaffold_592	+	9081	9330	acaggauaucauaccuagacgugguuugauauaaaguagguauaguaaaaaucuuaucuuggauaagaauaucuauuuuuucugccacgaugucuaauucgugaauaguaucauccgcuaauuuagcguaaauagguacuuugguuuuuacccaaaaauucgguggaaugauauauuuauuggcuagacacaugcuagcaccagugucaacauaacagucaacauuauacuuucgguauccacuaaagga	...(((((((.....((((((((((..((...(((((((((((........(((((((...)))))))))))))))))).)).)))))...)))))....(((((((.((((((((((((((((...(((((..............)))))....))))).))))).)))))))))))))..(((((.(....))))))...(((((..((......))..)))))........))))))).........	-58	1.35748	3.07831	1.25922
ptc-miR6517	3.3	aaaaauaaaaagagagaggag	ccucucuuuuuauuuuuuuuu	Chr05	-	248423	248672	cauccaucuaugcuuugacaaagucggugcgcugugggaccuuucuuuucagccuuucguucucaucagccgacagguauccacgugcuuaguuccuauugauucacacuucugcuuuacccccaccgccccuccucucuuuuuauuuuuuuuugucuccucucuuuuuucuguaguacaacuacagaaaaaagagaggaggucaaaaaaauaaaaagagagaggaggucugaaagaaagaccuccacuc	..........(((.(((((...))))).)))..(((((..((((((((.((((((.(((...........))).))).......(((.(((((....)))))..))).......................((((((((((((((...((((((((((((((((((((((((((((((...)))))))))))))))))))))).))))))))...)))))))))))))).)))))))))))..).))))..	-90.4	17.6473	12.9289	20.1475
ptc-miR6519a	3.8	aaccgaaccgaaccgugaacacca	ggucaggguucggguuuagguuuc	Chr02	+	19467165	19467414	gcuaagguuuggaugagagagccaaaggaccggguggaguuuuggguuggugggucaggguucggguuuagguuucccgauuuuuugccaagaaaaccggauuuaaccgaaccggaccgguucgguuugaaccgguuuucggucugguucgguuaauauuucauaaaauuaauguaauucgguucgguugguuuuuuuagucuaaaccgaaccgaaccgugaacaccacuaauauggaccauucccauga	.....((..(((.........((((((..((....))..))))))((((((((((((.(((((((.....(((((...((((....(((((...((((((((((((((((((((((((((.(((((....)))))...)))))))))))))))))....................)))))))))...)))))......)))).)))))...))))))).)).)).)))))))).....)))..)).....	-95.1	16.2898	12.9289	7.55532
ptc-miR6596	1.2	uggaaugaagaugcucaaa	ugaagccuuuguuaucgaaa	scaffold_61	+	114715	114964	cuugcuucuuuuggaugauguuuggaaugaagaugcucaaaaauggauguuguugaagccuuuguuaucgaaaggugcugcuggaagcaagauuauaguaacuacccguagucaacguguugcugagauuauggguacuguuacugcauacaacccaagucuucuaggucaagaggacugucugucguuguuuugcaagugugcauucaaggaaggggaaaaggaguuguauccaaauuugguuggaauu	(((((((((...(.(..((.(((.((((((((..((((((.(((....))).))).)))))))))..)).))).))..).).)))))))))....((((((((((((((((((.............)))))))))))..)))))))..((((((((.((((((((......)))))))).(((.((.(((...((((....))))..))).)).))).....)).))))))(((((......)))))...	-71.9	936.663	881.013	817.234
ptc-miR6540a	1.4	augguuuguacaagggagucuguu	cuguucccuuaguuuuccuauuc	scaffold_45	-	172227	172476	uacugcuguagcgugcugucugcuggguuggaaggagcuucgcuacugguuuuugggucuccuagcugauguuuucauuguaugcuaguuuguuuugccuuauggcuuugaugcuuguucaaagggagcuuguucccuuugauucuagguugauccagggagucuguucccuuaguuuuccuauucagcaagcuugucuugcuuaugguuuguacaagggagucuguucccuuaguuuuucuguucagca	...(((((((((((((((((.((((((.....(((((((........)))))))......)))))).))))........)))))))).........(((....)))...((((((((.(((((((((......)))))))))...)))))..))).((((((.(.((((((((.((....((((..((((((.....)))))).)))).....))))))))).).))))))).............)))))	-75.3	25.7922	12.9289	17.6291
ptc-miR6608	40.6	uuaacgacuauauaagccucuagu	cugaaguuugugacacucgaacu	Chr03	-	17110398	17110647	cuaauccuuuaaaguucuaaaauuaacgacuauauaagccucuaguaacccugaaguuugugacacucgaacuaaucuaaagaacaaacacaagaucuaacuaguuaagcuacaccccucaaaguuaaguauuugauauuuuuguaugaccgcaucaugaucauauacgcauguaucauuuauuuauccuguaucucguuuacuuccccaacaagugagguugacgacucuugagauuuuuuuuuccuga	.............(((((...((((.(((...(((((((.((.((.....)))).)))))))....)))...))))....))))).....(((((......((((...))))...........(.((((((..((((((...(((((((.((.....)).))))))).....))))))..)))))).).......(((((.(((((.(......).))))).))))).))))).................	-35.6	106.562	76.3422	66.7387
ptc-miR6614	2.4	uuaguuguuuguguaugacaug	ugucaugcacggaugauugaa	Chr07	+	13278875	13279124	guugugacauuguuguccaaucuuaguuguuuguguaugacauguguacaugcacugaugggaguaucaugugcaugcgcgcgugucaugcacggaugauugaaauuaaacaaucgcaucgaucacaauuguucacagcuuuccuuuugugcuugcuggaaaauuggcuuacccacuaaccuucaauaggugguuaagguaaacagugaacuagcuucuccucaacugguuuauuuucuaaauaaaauuu	((((((((((((((((..(((.(((((((((((((((((((((((((.((((((((((((....))))).))))))).))))))))))))))))))))))))).)))..)))((((...)))).)))).)).)))))))...((..(((.....(((((...((((..(((((.((((.(((.....)))))))...))))).))))...))))).......)))..))(((((((...)))))))....	-84	31.2221	30.1675	52.8873
ptc-miR6565b	0.8	gguuugauauaaaguagg	uaacaggauaucauaccua	scaffold_592	-	4317	4566	aacaauauuuucgggaggcggagcuuuggugugacuaccauaagcuuuagacucgaggaaaccagguuuaccuugaugguaagccgaggugacuuugggacaaacaacaauuuguccaucauugugaaagacaacaauuuuaccccacugaccaaaaggcucauaaaggcgacaaaaauuguuuccuaacaggauaucauaccuagacgugguuugauauaaaguagguauaguaaaaaucuuaucuugg	((((((.((((((.(((..((((((((((((....))))).)))))))...)))((((..(((.((((((((.....))))))))..)))..)))).(((((((......)))))))...(((((........)))))....((....(((((....)).)))....))))).))).)))))).((((.....((((((.(((.......))).))))))....))))......................	-66.9	1.35748	3.07831	1.25922
ptc-miR6554	0.9	cuuuuuugaucuauacauuucu	cuaugguuuguucaagggaguc	scaffold_45	-	231364	231613	uuuuucuauuuugccuuguauggggguuguccaugcuacuauauaugggauccuauccccuuucucgggcuggcuuguguuggggagaauguuccccugcacucgccuuuuguguuugcuaugguuuguucaagggagucuguucccuuugcuggugcauguaauguucugcugguuuccagcuuguacugcaagcuugucuugcgcuuuuuugaucuauacauuucuuacauuugauaaaaaaaaaaaa	............((((.(...((((((..((((((........)))))).....))))))...)..)))).(((..((((.((((((....)))))).))))..)))....((((..(..(((..(.(.((((((((((..((.......(((..((((.(((.......(((((...)))))...)))))))))).......)))))))))))).).)..)))..)..)))).................	-67.9	89.5939	53.5627	99.4784
ptc-miR6630	5.1	uuucuauauaagugaaccuccagc	uugagguucacuuauauauaaauc	Chr05	-	4501631	4501880	ugcccuccuuuuuuaacauaaaauuguuccucuguaaauuuucuccuccuuuugcauauggcuugagguucacuuauauauaaaucucuacacguguuauucaaggaaauauugcaauaauuauuaucuuuuauaaccagcaccaacaaauccuuagauaaaaaauaauuauugcaauauuuccuugaauagcacguguaaagauuucuauauaagugaaccuccagcuauaugcaaaaggaggagaaaa	..............((((......))))..........(((((((((((((((((((((((((.((((((((((((((((.((((((.(((((((((((((((((((((((((((((((((((((((((..........................)))))....)))))))))))))))))))))))))))))))))))).)))))).)))))))))))))))).)))))))))))))))))))))))))	-127.6	22.3985	11.0819	8.81454
ptc-miR6563	0.4	gcacuauaacacugaauguc	uauccaguguuauaguugcaa	Chr15	-	4722152	4722401	ccauuuaaggaagaggucaauaaagacgaagaggauuucaaugauuuaaaaaaaaaggaucuuggaauauaagauucagaggcagagauguaagaaacaacacuagaggaggauggggacaacaaacauuuacuuuuagagaaagaggaggcaauuacaauaaucaugacaagagaaauauccaguguuauaguugcaaucaguuugagcacuauaacacugaaugucgaaaaaagcuucauuagaggua	((.(((((.((((..(((......)))..........(((.(((((..........((((((((.....))))))))....(((....)))...........(((((((.(((((...........))))).)))))))......................))))))))........((((.((((((((((((.((..(((...))))))))))))))))).)))).........)))).)))))))..	-47.1	33.2583	36.9398	109.552
ptc-miR6592	8617.9	ugaacuuggacucauaucaug	ugucaugguccucacaccuuc	Chr04	-	1892063	1892312	gccucuucauuggcuauacacguguccacuuauauccagccaucacauuggcucuggggcauucuguaauugggcuccuaucauggcccucacaccuucuccugaggugucuccgccugucgucaugagacggucugaacuuggacucauaucaugguccucacaccuuccauccgaggugucuccgccugucgucaugagacggucugaacuuggacucaugucaugguccucacaccuuccaucggag	(((........)))..((((.((((((..........(((((......)))))...))))))..))))...(((((........)))))..(((((((.....)))))))(((((.........(((.((.(((.(((....((((.(((..(((((((((((.(((.(((((.(((((((....))))..)))..))).)).))).)))....)))).))))..)))))))))).))).))))))))))	-77.1	2272.43	2446.03	3251.31
ptc-miR6595	383.8	ugcuaggaccaaguuuucugg	aaaaaacuugguccuagcaaa	Chr13	+	11846882	11847131	ugguauggacaguaagcuauuuugcuaggaccaaguuuucuggaaaauguuaagauuaauuaaucuuaacauuuuccaaaaaacuugguccuagcaaaucauuccacuucauccuauuuguuaguuauguaccgcauaauuuguauauggcuucauggugcauaagaacuaacaaauuagccauuacaggacucuuugauuuuucugcuggaucugaauuuguuggcagagaaauugucaaauguauuaa	((..((((..(((.......(((((((((((((((((((.(((((((((((((((((....))))))))))))))))).))))))))))))))))))).......))).....(((((((((((((((((((((((((.......))))......)))))))))...))))))))).)))))))..)).(((.....((((((((((((((...........)))))))))))))))))...........	-90.2	173.079	209.325	152.366
ptc-miR6556b	371.1	gacaaaaauggcauaagagagg	ucucuuauacguuuuugucuc	Chr05	+	24662063	24662312	uugauggaugggaucggcaggggacaaaaauggcauaagagagguacagugggaggcaggagaaagaccaauaucucugcuacccuucuuuuucucuuauacguuuuugucucucgccggucucacccguguuaauuugcccugauaacugauaaggccaugguauauauauaugauucuuugacccaauucacaugacaaucuucuucucuagacugcaucgucuuguucaugagguauguucuugucu	.....((.((((((((((.(((((((((((((..((((((((((......(((.(((((.(((.(......).)))))))).))).....)))))))))).))))))))))))).))))))))))))(((((.....((((.((....((....))..)).)))).....))))).................(((.((((..((((......((((......)))).......))))..))))..)))..	-78.1	22.3985	8.00362	110.811
ptc-miR6619	0.5	uugaugaaaauauggaguuug	aacuccauaaauucaucaauu	Chr18	-	14010314	14010563	ccaaacccacagccuauccuagucuaacccauuuaacucaaaaaucaaauagagcccacgaggggaaaacaaccaaaacccaaacagaaccuaacaaccaucaucguguuacaugcuaacccauuaaccaucaucaaacuccauaaauucaucaauuuuuuguugcuguaacugaagacacuccauugaacucgcucguagcucagauugaugaaaauauggaguuugaugauggcaggcacugacgagg	.................(((.(((...((.......(((............)))..((((((((..............)))......................)))))...................((((((((((((((((((..(((((((((((...(((((.((........................))..)))))..)))))))))))..))))))))))))))))))..))....))).)))	-56.4	10.1811	3.07831	1.25922
ptc-miR6533	102.3	aggggggcaauuuugagcggagaa	cucugcacagaaucgccuccaccu	Chr16	-	3622999	3623248	uuuccacaccacauuuuuauguaggggggcaauuuugagcggagaaaauuuaaggaagcauaaaaaaaaccguagauauauuuucucugcacagaaucgccuccaccuacgcuauaaaaaccaaaccggucgccacucucgcuuucuuuuccuuuucuccuuuuucagccguccccgacuuuucccucucucugucgcccgauuacuccuucucuuuuccagaucuauuauucaccuucuccaucgcuag	...................(((((((((((.((((((.((((((((((((((.((..............)).)))))....))))))))).)))))).))).)).))))))........(((.....)))....................................((..(((..((((..............))))...)))..))...........................................	-40.7	56.3355	16.0072	10.0738
ptc-miR6527	101.4	acaggcaguggagcaaauaugaau	cauauuuguuccauugcc	Chr13	+	832174	832423	ccgucaagccgaauuuggaugcacaggcaguggagcaaauaugaauucuaaccuucagaauucauauuuguuccauugccuguggaugcauaugugggcuucauuaaaauguuuuugcacaguaaaucgucggggaggcuggaaguuuugcuugaauucgaauggcuccuuaggccuugaguggaaucaagaugguugauaauuccaaagcuuauccuaaauuuaaauguuuuccugcguuugaccauug	..((((((((.(...((.((.((((((((((((((((((((((((((((.......)))))))))))))))))))))))))))).)).))....).)))).........(((....)))........((.(((((((((.(((((((((((((((.((((...((((.....)))).....)))).)))))......((....)))))))))..)))...........)))))))))))..)))).....	-86.8	70.5891	35.7084	40.2951
ptc-miR6559	2.7	gaggaaagaauugacaaaaag	acuugucacucuccucuc	Chr11	+	6419985	6420234	ccaaaacgaaagaaaaaguagagaggaaagaauugacaaaaagagagagagagagagauagagggaggaagaagcuggaaucacaugggcuuguuguaguuguugucucucucucucucucucucucuuucuaacuugucacucuccucucucucucuuuucucucauucucuuugguucgcugagucuuucuuucuuuccuuuugccuuaucuaguaucgccccaacaucaacaugaucucucagccua	(((((..(((((((((((.((((((((.((...((((((..(((((((((((((((((.(((((((((....(((((.((.((........)))).)))))....))))))))).)))))))))))))))))...)))))))).))))))))..)).))))))....)))..)))))...((((((....((.............((..(((...)))..))..............))...))))))...	-85.7	9.50238	6.77229	0
ptc-miR6625	37.2	uuuaauuuccuccaauaucuca	aggauuggagggaauuaaaca	Chr10	+	21059512	21059761	agccuguugaagccucaaagucaagaguguguugugugugaaaauuggagggaacuaaagagaugucacuguuuguuuuggugccgauuuuuguuuaguuucuuuuacuugauucuucuccaacaugcaacuaaacgaauaucaugucuuggccgaaugugaggauuggagggaauuaaacaagauugcuuuguucucuuuuuacuguuuaauuuccuccaauaucucaugucugaccaccucuucauuu	.......(((((.......(((((((((..(((((((((((((((((((((((((((((.(((((.(((((.......))))).))...))).)))))))))))))....)))).)))....)))))))))...))..........)))))))...(((((((((((((((((((((((((((((..((...))..)))......)))))))))))))))))).))))))))..........)))))...	-64.8	14.9323	15.3916	11.333
ptc-miR6547	2.1	caagggcaaaucugugguuucagg	uaguccaacugguuugcccacaag	scaffold_56	-	189201	189450	uuuagcuggccauaagacagacaagggcaaaucugugguuucaggcgcaucgggucauuguccaccuaguccaacugguuugcccacaaggagaagggcucagcaacacauggguggugucccugguaggggugagggguuacuucccacccccuccucuuuauguuaauucauaguuggaaaaucagaggguuaaacaacccuuugaagcaacaugagguugccaaccucaugcggaagaauaaauuag	(((((((((((.............(((((((((.((((....(((.(((.........)))...)))...)).)).)))))))))...........))).))))...((..(((......)))..)).((((((.((((....)))))))))).(((...(((((......)))))..)))...((((((((((....))))))))))..(..(((((((((...)))))))))..).....))))....	-81.6	69.2316	25.8578	26.4436
ptc-miR6622	0.8	uugguuugcugcacucugcug	gcuuaaugcugcagagcaaca	Chr02	-	1275911	1276160	ggcaaaaggaaaaaggaugagguugaugagauuagcagggggcaaaaaugcaugagaaacugagagagggccaaaaggaagcaagaggagaguuugaagaaacgagaaaagagucacgccaaaguaaaagaggaaacuaauauaaucucucugcuuaaugcugcagagcaacaucagcuagaucugaaacauaagaucaagccgcaguugguuugcugcacucugcugggagacuagauuaguuuccucu	(((..................((((((...))))))....(((.......((........)).......)))...................((((....))))..............)))........(((((((((((((.((.((((((.((....(((.(((((.((((..(.(((.(((((........))))).))).)..)))).))))).)))....)).)))))).)).)))))))))))))	-66.4	12.8961	19.0855	21.4068
ptc-miR6611	0.5	uuacguaccuggucaaguagac	auacuucaucaggaguaaga	scaffold_923	-	3512	3761	ggaucuuagauaauuucuguguuauuucuuccuuuaauacaaaaggaaucucaguauguccacguguguccuuaauaucuaaaggauauucucuaguggaaauacaugugauaauaugguucuuucuacagaacaacuuauucuuaacuuuuucuacaguacuuaaagauuuaaauacuucaucaggaguaagagauaaauuagucuuacguaccuggucaaguagacugucguuaaguguuaugucuug	((((...(((((((......)))))))..((((((......))))))(((.((((((.(((((..((((((((........))))))))......))))).)))).)).)))......(((((......))))).........................(((((((.(((.....(((((.((((((.((((((..........))))))...)))))).)))))....))).)))))))....))))..	-59	122.173	134.83	138.514
ptc-miR6591a	2.3	ugaaaugccaugaacaacgauc	ucguguucauggcacuucaug	Chr13	+	12240571	12240820	auucucuguacuguacagaucagucggaaugaggcggcugaauugccaugaacaacgaucucuucauggacaggauuucuuugugaccuuguauauguugaugccuagcaaaauauugacucguauuuggacgcaaugguggcugaaaucgcuauaaauggaucguguucauggcacuucauguauuucugcagcaauuagaaauaugaaaugccaugaacaacgaucucuuuauggggaugauuucuua	((((((((((...))))))(((((((........))))))).((((((((((..........))))))).)))((((((...((.(((((((....((((((((..(((((....))).)).)))))..))))))).))).)).)))))).(((((((.(((((((((((((((((.(((((((..(((((.......)))))))))))).)))))))))).))))))).))))))))))).........	-83.2	6.78741	6.77229	10.0738
ptc-miR6633	0.3	uuugaugaauguuaggguuuu	aauuuuaagagagaac	Chr11	-	2987098	2987347	auagaugauaaauauaaaaagaaaguaaaaaaaaaggaaagagggauuugaaauuuuaagagagaaccgacaggagugaagugagaacgaagaagaagagaaaagagggaaauuaaaagggaaauagaaaggaguagaagaaaauaaguuuaaagguaagauuuaguuuuauaaauguauaaauguguucuuugaacuuuacauuucgguuuugaugaauguuaggguuuugaagauuuuauuauggguu	........................................((((..(((((((((((((...((((((((..((.(((((((..(((.(((.(...............(((((((((............................................)))))))))...............).))))))..))))))).))))))))))........)))))))))))))..))))..........	-26.29	3872.9	2013.83	1912.76
ptc-miR6624	0.3	uuuaaagguaagauuuagguu	ccugaaauuaagagugaaaa	Chr01	-	37785077	37785326	auaaagcccuugaaggcuuaaaaguggguauaaaugaauaagaaguauugugguaauugaauaaacauaauaaguauagauagaaaaaaaaagagagaccugaaauuaagagugaaaaacugacgggagaagagaagaaaagggaaagaaaaagaagagaaaagagggaaagauaagggaaggagaagagagucggagaaaauaaguuuaaagguaagauuuagguuuuuaaauauauaaauguguguuc	...(((((......)))))..........................(((((((.............)))))))...(((.(((...........(((((((((((.(((....((((...(((((...................................................................)))))..........))))....)))..)))))))))))...........))).)))..	-23.94	1058.84	518.388	425.617
ptc-miR6537	4	aucauaacuguaggaaucauc	ugacuccuacaguuaugaugg	Chr06	-	6945975	6946224	ucacaaugaagaucaugggccaucauaacuguaggaaucaucaugaucaucauguuuuguuagggaugaucacgaugacuccuacaguuaugauggcucgugaucuucauuguaagaaccuucugauaucaguugcaguuucggcuuuccguuuucuuucuucauuauuuuuuaguguuucagaauuuuggaaauagaaauaaaaaucgaaaacuuuuuuacuuuggacuuuuguucugcaaggauugaa	..((((((((((((((((((((((((((((((((((.(((((.((((((((.((......))..)))))))).))))).)))))))))))))))))))))))))))))))))).........(((....)))((((((..((...((((((..((((.....(((((.....)))))....))))...))))))..))(((((((.((.(((..........))).)).)))))))))))))........	-97.4	108.599	168.692	423.098
ptc-miR6568a	28.4	guuaaaaccggaccgugaacaccc	uuuuccgguucgguugaauuuuu	Chr01	+	3603925	3604174	gaacgaugcuuuuauagaauuacaaugaaauucaugugagaaaaucucaguagcucagugaugaagauuaguucgguuuuugugguuuuuaugcuaaaaaaccgacccgaaccgaacaaacccgguucgguuugaaccgguucucgguucgguucggguucuauuaauaaggaauaccauuuuccgguucgguugaauuuuuggguuaaaaccggaccgugaacaccccuaguuucaacgguaaacucac	....(((..((((((((((((.......))))).)))))))..)))...........(((((((.((((((.(((((((((.((((......)))))))))))))((((((((((((....(((((((.....)))))))......))))))))))))((((........)))).......(((((((((((((.((((....))))..)))))))))).))).....))))))))).........))))	-77.2	6.78741	3.07831	6.2961
ptc-miR6621a	0.5	uuggucaaguugauaaugagu	ugaucuuccucuugacaucaaua	Chr17	+	8557436	8557685	augauugagagauuauacuucucuaaauuucuacacccuugcauuugacuccaauuagagccacgcucugcugaucuuccucuugacaucaauaacgucuuugcuugguuugaacuauuuuugucuccuuuguuuuggcaccuauuuucuucuuccaaaauagcagcagcaacaauaucgaagacugaauagucuaagaggauauuguuggucaaguugauaaugaguugaucauacgaaucaagaagac	..((((.(((((.......))))).))))........((((.(((((.........(((((...)))))(((.((..((..((((((..((((((.(((((..(((((.....(((((((..(((((..(((((...((..(((((((........)))))))..))...)))))....).)))).))))))))))))))))).))))))))))))..))..)).)))........))))))))).....	-55.3	6.10867	6.77229	30.2213
ptc-miR6526	364.4	aauucugauguuagcaaugauguu	auaaggauuguuaccaagucaaga	scaffold_1649	+	457	706	aacuuucaugaagacuaucuacucgaauucugauguuagcaaugauguuuucuacagacaagaagauaaggauuguuaccaagucaagagguggucacccacucaacaauuaaucaucaaaucaauaguuccaaauuuuggccuauaaaaggaggcauuugccaugcauuuaggcaucuugguuuucagaucaagaucaugcucuuuauuucuuucuuuauauuauuguaauguuuaaguuuuauuucau	......(((((.((((((((.((.((...((..((.(((((((..((((((((.......))))))))...))))))).)))))).))))))))))..................................((((...))))(((.....))).(((....))).(((......)))((((((((....)))))))))))))..............(((.((((((...))))))..)))...........	-43.7	423.535	224.717	279.547
ptc-miR6620	0.4	uugauugaugaauugauuuga	gaaaauucuagguuuaagau	Chr01	+	44794109	44794358	uuucuuagcuuuaauuuucuauuuuguugaauauuaggguuuugaagauuguguuuuggguuugauugaugaauugauuugaauauuauguauugauuguuaugaauaaugaguuauuuaguugauuugaaagauuuuaaguaaaaaugaugauuuugaguuaucguuuauuuaaauggugaauuugaguuagaaaucuuguuauaucaguaggugauaugugaaaauucuagguuuaagauugaaaaug	((((..(((((((((.(((.........))).)))))))))..)))).....(((((.(((((((((...(((((..(((..(((((((.(((((((........((((((((..((((..((((((((((....(((((((((..(((((((((...)))))))))))))))))).......))))))))))))))))))))))))))))).)))))))..))))))))..))))..))))).))))).	-45.8	2013.15	1924.56	2338.37
ptc-miR6541	0.4	auguucuguuccgcucuugaaaag	ucaaaaaacggaacaaaacggaa	Chr04	-	9690238	9690487	cuucauacaagcgauuucucuuccuauguuaccucuugugugcaaguuugucaauuccauuccguuccguccggaauggccgaaacauuccauaccaauucaaaaaacggaacaaaacggaacaaauuucaucucauuuuaaaucucgguccguuccggauuuuucggcuaaauuccgcccagaacguuccgguuccauuccacauguucuguuccgcucuugaaaagccaaugaauuaaauugaaucaa	(((((((((((.(...................).)))))))).)))....((((((((((((((.......)))))))).......((((........(((((....(((((((.((((((((.......................(((..(((((((((.(((......))).))))....)))))..)))))))).........))).)))))))...)))))........))))..)))))).....	-53.2	149.323	62.7976	54.1465
ptc-miR6613a	0.4	uuagaucuugguuucucugaaauc	uuugagagaugagagacaagaaaa	Chr13	-	9694289	9694538	uguucuccuuguccagaaguuaaacccaacaaaaaaauacacaaaaccaaaggauuugacugcaaaaaaacaaagaaaaaaucaaaaguuauugaaauguaaaaucaucaaaaagcauggaggagaagaauacagauuugagagaugagagacaagaaaaacaucgauagcauugauacagaaacuguugagaaugcagaguuuuuagaucuugguuucucugaaaucccaagaaaacccuuucauggua	((((((.(((.((((..(((((((.((........................)).)))))))....................((((......)))).(((......))).........)))).))).))))))..(((((.(((((...((((....((((((.((....(((((...((((...))))....))))).))))))))...))))....))))).)))))(((.((((....)))).)))..	-47.9	6.78741	3.69398	3.77766
ptc-miR6552b	1.4	cugcucgcaagucggaggccu	cggaccgccgagcuugggg	Chr05	+	10781442	10781691	acggcggcgguggccgcugccccugcucgcaagucggaggccuggcugacguggcuggugcggaccgccgagcuuggggcaggcgacagccccugcuggcuugcucucucgcccgcgggggggcugccuucgggcccuggcccccugcgugggagaggcuaggcgcugcaggggccagcccgacgucgcuggccgcggcaggcgacagccccugcuggcuugcucucucgcccgcgggggggcugccuuc	..((((((((...))))))))(((((((.((((((((.((((..((((.......))))..)).)).)))).))))))))))).....((((((((.(((((((.(((((.(((((((((((.(.(((....)))...).))))))))).))))))))).)))).).))))))))(((((....((((((.((....)).))))))..(((((((.(((..........))).)))))))))))).....	-149.8	1112.46	1483.75	2445.41
ptc-miR6551	5.2	ccuggccuccgucuuccgagcu	ugcucgcaaguuggaggccugg	Chr14	-	16420262	16420511	ccgcgacgucacagcggcgguggccgcugcccgugcucgcaaguuggaggccuggccgacgugucuggugcggaccgccgagcucggggauugcgaggagagcucuacacuggugugggcguggcauuaaauugccgugcgcgcgcccaugcguuggcucuccucgccaucccugaccucauggcgugacgugcccgcugccgaggccuggccuccgucuuccgagcuggggcagacagccccccgcaug	.............((((.((.(((.(((((((..(((((.(((.((((((((.((((...(((.(.((((((...(((((((.((((((((.((((((((((((..((.(.((((((.((((((((......)))))))).))))))...).)).)))))))))))).)))))))).)))..))))...)))))).).)))...)))).)))))))).))).)))))..)))))).).)))))))))...	-153.2	10.8599	12.9289	7.55532
ptc-miR6552c	5.2	cugcucgcaagucggaggccu	gccuccgucuuccgagccggg	Chr05	+	10782443	10782692	acggcggcgguggccgcugccccugcucgcaagucggaggccuggcugacguggcuggugcggaccgccgagcuuggggauugcgaggagagcucuacgcuggcgugggcguggcauuaaauugccgugcgcgcgcccaugcguuggcucuccuugcaauccccgaccucguggcgugaugugcccgcugccgaggccuggccuccgucuuccgagccggggcugacagccccccgcaugauuguccccg	...((((.((.(((.((.(((((.(((((.(((.((((((((.((((...(((((.((((((...(((((((.(((((((((((((((((((((..((((.((((((.((((((((......)))))))).))))))...)))).))))))))))))))))))))).)))..))))...)))))).)))))...)))).)))))))).))).))))).))))).).).))))))))).............	-167.8	1112.46	1483.75	2445.41
ptc-miR6552d	5.2	cugcucgcaagucggaggccu	gccuccgucuuccgagccggg	Chr14	-	16268707	16268956	acggcggcgguggccgcugccccugcucgcaagucggaggccuggcugacguggcuggugcggaccgccgagcuuggggauugcgaggagagcucuacgcuggcgugggcguggcauuaaauugccgugcgcgcgcccaugcguuggcucuccuugcaauccccgaccucguggcgugaugugcccgcugccgaggccuggccuccgucuuccgagccggggcugacagccccccgcaugauuguccccg	...((((.((.(((.((.(((((.(((((.(((.((((((((.((((...(((((.((((((...(((((((.(((((((((((((((((((((..((((.((((((.((((((((......)))))))).))))))...)))).))))))))))))))))))))).)))..))))...)))))).)))))...)))).)))))))).))).))))).))))).).).))))))))).............	-167.8	1112.46	1483.75	2445.41
ptc-miR6519c	92.2	aaccgaaccgaaccgugaacaccc	aauguaauucgguucgauugguuu	Chr19	-	3896828	3897077	gaaaauuuuaaagcccgauuuaauguaaaccaauuuuaaaaaauccaaaaaaaauccauauaugaugggauuagguuucccaguuuuuuuuuuaaaaauggauuuaaccgaacuggauugguucgguuugaaccgguuuucgguccgguucgguuaauauuucauaaaauuaauguaauucgguucgauugguuuuuugaguuuaaaccgaaccgaaccgugaacaccccuagcuaccgccauuauguua	................(((.(((((....(((.((((((((((......................(((((.......))))).....)))))))))).)))..((((((((((((((((((.(((((....)))))...))))))))))))))))))................(((....(((((((.(((((((.........)))))))..)))))))...)))......((....))))))).))).	-64.4	35.2946	25.2422	21.4068
ptc-miR6628	3.8	uuuccuugaauaacacguguagag	uuacacgugcuauucaaggaaaua	Chr05	+	4501571	4501820	aauuagguuuagaguuuuguugucgcccucauuuuuaucuuaaaauuguuccucuguaaauuuucuccuccuuuugcauauagcuggagguucacuuauauagaaaucuuuacacgugcuauucaaggaaauauugcaauaauuauuuuuuaucuaaggauuuguuggugcugguuauaaaagauaauaauuauugcaauauuuccuugaauaacacguguagagauuuauauauaagugaaccucaagc	....(((...(.(((((((.....................))))))).).))).((((((............))))))....(((.((((((((((((((((.(((((((((((((((.((((((((((((((((((((((((((((((((((...((.(((....))).))....))))))))))...)))))))))))))))))))))))).))))))))))))))).)))))))))))))))).)))	-95.3	39.367	21.5482	26.4436
ptc-miR6609	0.4	uuaacgaucauguaaacuuccagu	cgucgguguaucugaucuagcu	scaffold_357	-	13526	13775	aaguugcugaggcuaauuaauuugaaacacuuuucaaauaaguauggaccuccucucuauacauacauaucgagucaauugcugacggaaacaucagcuuuucuauucaacucaagcacuguucgauuggauuuuuuuuuuuauuaacgucgguguaucugaucuagcuugcgcguaccucgacuaaucucacagauauuaaaguuaacgaucauguaaacuuccaguaauucuaaaggaacuccaacuu	.(((.((((((........((((((((....))))))))..(((((((.......))))))).........((((.((..(((((.(....).)))))..))..))))..))).))))))......(((((.(((((((...((((.....(((.(((.(((((((((((....(((.((.((......))..)).)))..))))))..))))).))).))).....))))...))))))).)))))...	-44.4	154.074	108.972	88.1454
ptc-miR6525	0.4	aauuaaugucgugcuugugaagug	cuucagaaacaugauauuuaauaaa	Chr04	-	22200423	22200672	guguucgauuuauuuaaauauuaauuaaugucgugcuugugaagugcaacaucuuaaguuaucgagcuucagaagcgcaacaucuuaaauugucgagcuuuagaagcgcagcauguaguugucgcgcuucagaaacaugauauuuaauaaauauuauacuugagaaacauaacaaaaucaaacuauauuauuuuaccaaaucuuuuuuaaacaauaucauuucuucaauuuuaaaguuuguuguacuuau	(((((...((((..((((((((.((((((((((((.((.((((((((.(((.((..((((...(.(((((.(((((.(.(((........))).).))))).))))).)))).)..)).))).)))))))).)).))))))).))))).)))))).))..)))).))))).((((...((((((.((..(((..................................)))..)).))))))))))......	-50.17	16.2898	9.23494	15.1106
ptc-miR6623	0.5	uuguauaucggcuggaaacc	uauaacaacgccacguacaacg	scaffold_923	+	3244	3493	agcuaaaaauguuuuccgcuuguuguauaucggcuggaaaccaauaacauccuccauuaagaggaaaccuuugguauaacaacgccacguacaacguguuuuugaaauuugguaucagagccuuguuuagguucagaaaugauauccguuauauuauauguuuagauucuguaaagaaacuaacauuacagaaaugaguacuacggaaacucaucaagaagaugaagacuuucaucaagaagucuuugaa	..........((((((.((.((((((((...(((((...(((((.....(((((......))))).....)))))....))..)))..)))))))).))...........(((((((((((((.....)))))).....)))))))....................((((((((.(.......).))))))))((((((.(....)..))))))...))))))(((((((((......)))))))))...	-58.7	214.482	185.314	220.364
ptc-miR6606	1.7	uuaaaaccggaccgugaacacccc	uuccgguuugguugaauuuuuggg	Chr10	+	9972287	9972536	cugugauuaauagcuuagauugauauuugaugucagauuuuuccuuugauuuagcucagugaugaagaugaguccgguuuucugguuuuuaugcuaaaaagcugacccgaacugaacaaaaccgguucaguuugaaccgguucucgguucgguucggguuauauuaauaagaaauauuauuuuccgguuugguugaauuuuuggguuaaaaccggaccgugaacaccccuaaucuugacuaaucucauga	.((.(((((...(((((..((.((..((((.((.(((((........))))).))))))..)).))..))))).(((((((.((((......)))).)))))))(((((((((((((..((((((((((...))))))))))....)))))))))))))........(((((.........(((((((((((((.((((....))))..)))))))))).))).........)))))..))))).))...	-77.7	4.75119	3.69398	5.03688
ptc-miR6603	0.6	ugucuuuguuucgcccuuauu	uacggaccaaacaauuacgau	scaffold_42	-	306457	306706	gucaacucucuacauucaaaauugucuuuguuucgcccuuauuugaccggaaguucagauugcucugaaaucaucagguuacauacggaccaaacaauuacgauuuuuaaaguagaagguugauguuagaacaaaaaaaaguagagggagcaaacuaguacaaaaucaagaguagaggaaccaauacaagcuuuuuaccuuuuuaguaggguuuuuuuuauugaauaauagcucugccugcagauuccac	(((((((.(((((.((.((((((((..((((((.(.((.(((.(((((.((..((((((....))))))....)).))))).))).)).).))))))..)))))))).)).))))).)))))))................((((..(((((..............((((....(((((((((..(((..................))).)))))))))..))))......)))))..)))).........	-59.3	8.1449	1.23133	3.77766
ptc-miR6580	0.5	uccgagaucucuuauugaauu	uuccauaaaagaucucaaauc	scaffold_23	+	338008	338257	uguuucuauuguaucaaucuacccuuguguaauuccuguuaaagacauagacucgugguugguuccagggagaacgauuuaaagcagacuccccauucauuuuucauuagauagaaaaagaucaccaagauuucgugauccgcaaccgaacuuauuccaauuccauaaaagaucucaaaucgaaucgguauaucaauauugauuugauccgagaucucuuauugaauugcucauucaaugagcguacuua	..........((((.((((.((((..((.((..((........))..)).))..).))).))))...(((((................)))))......((((((........))))))((((((.........)))))).................((((((.((((.(((((((..(((((((((((((....)))))))))))))..))))))).)))).))))))(((((...))))).))))...	-59.1	142.536	197.012	69.2571
ptc-miR6555	4.3	gaaagaucuuggguaacgaauuca	gauuaaucuugucgagaucuuuuau	Chr14	-	9263936	9264185	uacaacaucauugguaucaucagaaagaucuuggguaacgaauucaacgacaccaagaaagaucaucaauagugaaccgagugugccacacuugucguccaaaaaugacguguggcucauuuaucuuugacgacaagugaggcauauucaggucauuguugaugucuuuuuuuuuuuuuguuggauuaaucuugucgagaucuuuuauaugauaucgguugcguuguaaucggaguuuucaguguuucuu	((((((.(.(((((((((((..((((((((((((......((((((((((....((((((((.((((((((((((.(((((((((((.(((((((((((.(((((((((.....).))))))...)).))))))))))).))))))))).)))))))))))))))))))))).....)))))))))).......))))))))))))..))))))))))).).))))))......................	-100.3	10.1811	6.15663	2.51844
ptc-miR6605	0.4	uguuuuguugaauauuagggu	aucuguggaaauucuggguu	Chr04	+	6015077	6015326	auuuucuuuagcuuuaaauuuauguuuuguugaauauuaggguuuuguagauuuuguuuuggguugauugauuuaaauguuaugaguugauuguuguggguaaugaguuauuuaguugauuuuggaagauuuuagguaaagauaauaauucugaguuauaauuuguuuaaauggugaauuugaguuagaaaucuugaaauauuaguaggugaucuguggaaauucuggguuugaguuugaagaugauaaa	(((.(((((((.((((((((((.(((((((((..((((((.((((((.(((((((..((((((((.(((.(((((((((((((((.(((((((((((...((..(((((.(((((......))))).)))))....))...)))))))))..)).)))))))..))))))))))).))))))))...))))))))))))).))))))..)))).....)))))..)))))))))).))))))).)))...	-44.9	572.858	230.258	220.364
ptc-miR6601	4.7	uguaauucagucgguaacuac	aguuaccgacugaaguacgga	Chr02	-	14177182	14177431	uuuuaauucggaaacuuuuucguuuguaauucagucgguaacuaccgacgaaaacucuucugucaguaauucagucgguaacuaccgacggaaaguuuuugucgguaguuaccgacugaaguacggacggaaaaguagccgucgguaauuucgaccucaaauuaccgacagacauauuccgucaguaaauccguugcuauuuagcgaauuucugguagugauaucacuauuuaauacuaccauuuaaaaa	((((((...((..(((((((((((((((.(((((((((((((((((((((((((((.(((((((.(((..............))).)))))))))))))))))))))))))))))))))).)))))))))))))))..))(((((((((((.(....)))))))))))).(((.......)))..........(((((....))))).....((((((((.((........)).)))))))).)))))).	-106.1	42.7607	33.8614	31.4805
ptc-miR6618	0.5	uucuggacaguguuauuauga	uugauaauugauuuggaauauu	Chr05	+	3101683	3101932	uauggguuaagaaauucauuuuuaccuugcuggaaaaucuggacagaauagucuugagguugaagaugaccaaauuuuauuuugguccuugauuuauaaaaauuucaguuuagucccuaaacuuuggauaaauuacaaauugaccccuaaauguauuuugagauucuggacaguguuauuaugagguuuaggaugaugaaucucaguuugauaauugauuuggaauauuuucaguuuggucccucaauuu	.(((((((....)))))))....(((..((((((((.((.((((......)))).))((((((....(((((((......)))))))..((((((((..((.....(((((((...)))))))))..))))))))....)))))).................((((((((((((((((...(((((((((......)))))))))...)))).)))).)))))))).))))))))..)))..........	-55.2	2463.15	2074.78	2431.56
ptc-miR6575	1.7	uauagauugcagagggaacc	ugcccacugcauaucuauuga	Chr02	+	12234127	12234376	caaaaccaguacuucaugaaucuauagauugcagagggaaccaucugauuuugagccauuugacuaauuugcaucagauggugcccacugcauaucuauugauucaugaaguguuaguguuugguguucuaugauacacuccugaauuaugauuagguagaccaacccuuuuaauucacuggggugguaauuggagguaggguagcuggugaauauggaaaauauggaaauucugaauuauuuuuuuccu	....((((((((((((((((((.(((((((((((.(((.((((((((((.....((.(((.....)))..)))))))))))).))).))))).)))))).)))))))))))))..(((((.(.(((...))).).)))))(((((.......)))))...(((...(((((....((((....)))).....)))))...)))..)))))......((((((.....................)))))).	-78.3	4.75119	3.07831	6.2961
ptc-miR6535	0.8	aguuucugucugagccua	gguccaggaauagauauuau	Chr06	+	23980842	23981091	agguccaggaauagauauuauuaguuucugucugagccuauaacacuguucuaguucauuuugcuuuuauaaucucaagucuucagggacuugguggcagugaugucauugauaaucccagcucuaugagaccuucaauuugaagguccaggaauagauguuaucauucucugucugagccuauaacacuguucucguucauuuugcuuuuauaaucucaagucuucaggaacuugguggcagugauguc	((((.(((..(((((...........)))))))).))))....((((((((((((((.....((((((((((...(((((((....)))))))((((((....))))))..........(((...((((((((((((...))))))))..(((((((.((((((....(((.....)))...)))))))))))))...))))...))).))))))....))))......)))).))).))))))).....	-66	2.71497	28.9361	15.1106
ptc-miR6585	0	ucugccguugugauugccugaggc	ugcggguuguugaagguaguaa	Chr01	+	41694291	41694540	uuguggcguugcggcuggugcggcugauggcgcugaugguuagcaaauuuggaaccgaagacaaagagcuguuguggcugcggcgcugcggguuguugaagguaguaaaucggcguggacuugugaucguuggcugugaucggcguugauguaaaauggucgaucguucugugggacugaugugcaagucuucuugguggugggucugccguugugauugccugaggcgccgcugaaggcggggcgccac	..((((((((.((.(((((((........)))))..(((((..((....)).))))).........((((.....))))((((((((.(((((.((((..(((((...((((.((.((((((((.((((((.((..((((((((..............))))))))....))..))).)))..))))))))...)).))))....)))))....)))).))))).))))))))...)).)).))))))))	-93.9	12.8961	12.9289	5.03688
ptc-miR6586	0.4	ucuguucaaauucugauguuagc	uaacguuuuguucagaca	Chr03	-	6437091	6437340	aacuuucaugaggacuaucuguucaaauucugauguuagcaauaacguuuuguucagacaauaagauaaggguugucaccaagucaagagguggccacccacucaauaauuagucaucaaaucaauaauuccaaauucuagccuacaaaaggaucaagaucaagaucuugguguucagaucaagaucacucucuuucuuuguauuuuguaauguacaaguuuuauuuuauguuauauuaaucucuuuuuu	........(((.(((((((((..(((.....(((((((....))))))))))..))))...........((((.((((((.........)))))).))))..........))))).)))........................((((((.(((...(((....(((((((((......)))))))))....))))))))))))...(((((((((.((......)).)))))))))..............	-49.1	783.946	462.363	469.689
ptc-miR6567	0.9	gugcuuaucgacggucuugugcu	cacacaacauauucguaagcuacau	Chr05	-	427225	427474	guuuuuggucguuuaggugcaugugcuuaucgacggucuugugcuggcuaguugucuuccaccagcacacaacauauucguaagcuacauuaacaaauccacaguuuuauuuuaguuucuccugucuuugugaggaaaagcuuucaaugcugugguguacaccauaaaucauauaucaauguuugauuauguuuugugaaaugcauugauuugguugcauuaucuuuaaugcugaucaacuaaggaugua	(((((((((.......((..(((((((((.(((..((..((((((((..((....))....))))))))..))....)))))))).))))..))....(((((((........(((((.((((.........)))).)))))......)))))))((((...((((((.((((.(((((...))))))))).))))))...))))......(((((((((((....)))))).))))))))))))))...	-68.9	173.079	76.3422	135.996
ptc-miR6621b	0.5	uuggucaaguugauaaugagu	ugaucuuccucuugacaucaaca	scaffold_723	-	351	600	augauugagagauuauacuucucuaaauuucuacacccuugcauuugacuccaauuagagccacgcucugcugaucuuccucuugacaucaacaacgucuuugcuugguuugaacuauuuuugucuccuuuguuuuugcaccuauuuucuucuuccaaaauagcagcagcaacaucaucgaagacugaauagucuaagaggauauuguuggucaaguugauaaugaguugaucauacgaaucaggaagac	..((((.(((((.......))))).))))........((((.(((((.........(((((...)))))(((.((..((..((((((..((((((.(((((..(((((.....(((((((..(((((...((((.((((..(((((((........)))))))..)))).)))).....).)))).))))))))))))))))).))))))))))))..))..)).)))........))))))))).....	-58.4	6.10867	6.77229	30.2213
ptc-miR6582	1.1	ucgagaaaaguaacuaauagc	uauuaguuauuuuucuaaauc	Chr03	+	4469434	4469683	ggaaagggaguagggguagcaauguuugggaaauuuuaugauguagauggaguaacuuguugaauuuuauuaguuauuuuucuaaaucuauuuuaaagaaaugauagauacacaaaggaaagagaaaauuaaauucaggaccuagaaaaaaagaauaucuucaccuaacuuuucuuucuuuauguguauuuauuucuuugagauggaucgagaaaaguaacuaauagcguucuguuaguuauucugaaua	....(.(..((((((....(((...))).....))))))..).)...((((((((((....((((.(((((((((((((((((..((((((((((((((...((((((((((((((((((((((((..........(((....(((...........)))...)))...)))))))))))).))))))))))))))))))))))))))..))))))))))))))))).))))....))))))))))....	-70.6	10.8599	7.38795	6.2961
ptc-miR6571	1.1	guuugucagacccaaguaaacgug	cguuaccugugucuggcaccuaa	Chr13	-	16244788	16245037	uauguccaaucgacuuagauauggcaauaaugucagacucaaucgccuugaauuuaguagucaugccaaaccaaagaucuuagagucugacagccuugauagauccaagcaacuuaggucuuguauaacugucaaacccacguagacaaacauguuagacccacguuaccugugucuggcaccuaaguaauuuggcucuugcuuguuugucagacccaaguaaacguggguccaacgcagcuuuuguaaa	(((((((((((......))).)))......((((((((((......(((...(((.(((....))).)))...)))......))))))))))...(((((((((.((((..((....)))))).))..)))))))....))))).(((((..((((.((((((((((((.((.((((((((..(((((((........)))))))..)))))))).)).)).)))))))))).)))).....)))))...	-71.3	13.5748	6.77229	0
ptc-miR6522	0.4	aaggaaucgaggaugaaaaaggca	uucacuuucuauugcuucgauacc	Chr01	-	41524848	41525097	uuccccaccaauacuuccauuuccucaugcuaugaccaaacaaagggaagucaaucaugauuuugaaaucuuugaaacuuucaaagaagaaggaaucgaggaugaaaaaggcaccgaaaaugucgucacggaucauuugucaaaauugacaauagauucgacaucugacaucacaccaauugacgauuacuuucuuggucaaucuucacuuucuauugcuucgauaccuuggucugcuaauauugauaau	............................((...(((((.....((((((((((....)))))))....((((((((...)))))))).((((.(((.((((.((((...(((...((((..(((((((((((((..((((((....))))))..))))))....................)))))))...))))...)))....)))).)))).))).))))....)))))))).)).............	-52.2	45.4757	23.3952	20.1475
ptc-miR6589a	1824.4	ucuucucugauaauaugcu	caauuauuuauguagaggccu	Chr01	-	44803760	44804009	aauuauuucccuuucaccagccucuucucugauaauaugcugcaauucagcgcaauuauuuauguagaggccugcuagcuuuggcagacuucgagccagggacggugugaagauaaaugucaguuugucgagagaucucaauuucagaauauuaagacuuuggaggcugacauaucuggugggccccuuccauaugcauuugaccucagguaaccuuugcagaucuaacauuguuaaagaugacagcagc	...................((((((.(...((((((.(((.((......)))))))))))...).))))))(((((..(((((((((.(((((.(((......))).)))))....(((((((((..((.((((.(((.(((........))).))))))).))))))))))).....(((((.....))))).((((....(((...)))......)))).........))))))))).....))))).	-65.3	391.634	344.771	266.955
ptc-miR6573	1.3	uagaugauguguggaauga	ugacauuuuagaacuaggacu	Chr18	-	247132	247381	ggaaagaaauucuugcuuguccuagaugauguguggaaugaggauuccucaaagugggagcaacugaaaaacucccuuaagugugguuguuugccuggaaguagaauuuuggugaccacacguaagaggaaaguugcaaauugcaugggcuccucauccgcugacauuuuagaacuaggacuucucucuacagaugaauguuggucauuauucagucaguuugcauauuuugaaaaaaacaguagagaga	((.((((...)))).)).(((((((..((((((((((.((((((.(((.....(((.((((((((.......(((((((.((((((((....(((.((((......))))))))))))))).)))).))).))))))...)).)))))).)))))))))))..)))))......))))))).(((((((((...((((((........)))))).((((..........))))........)))))))))	-73.3	695.71	842.227	778.198
ptc-miR6558	1.5	gacagaaugagaagugagc	ucacucucuucugucag	Chr06	-	26631388	26631637	ccgaauuccggcucuggaagcugacagaaugagaagugagcacgcaaaagcaaugguauagauuuauacaaauaugccucugugugcucacucucuucugucaguuucuaauguccagaagaagaaaaaacaaaaacaaacgaaacccuuuuuuuucguggauuaguucuugagugaaagauauagcuuaccaaaaaauggaaagaaaagaaagaaauuuagcacaaaaugcauagaagaauucagucag	..((((((......(((((((((((((((.((((.(((((((((((...(((...(((((....))))).....)))...))))))))))))))))))))))))))))))..((((((((((((((......................))))))))).)))))((..((((......))))..)).(((.(((.....))).)))............(((((((.....))).)))).))))))......	-76	23.0772	36.9398	16.3699
ptc-miR6578	15.7	ucaugguccaguaaaauuugac	caaauuuaauggaccaugaca	Chr01	+	2124339	2124588	auaacggcaagcccaauuagcuugauaaugaggcuugguuaaguugaguuuaguuuuguaaugcauguauagaguuaggaagugccuucaaagccaccaaagguacaaacucuuaaugguggaucauguguccuaccauccggucaaauuuaauggaccaugacaggauaucauucuguuuuuggcuggauuucuaugaaauucugucaugguccaguaaaauuugacugggugcuacgacacauucagu	.((((..((((((..((((......))))..))))))))))..((((.((((....(((...)))....)))).))))((((...))))....(((((((((((....)).)))..))))))...(((((((.((.(((((((((((((((..((((((((((((((((.((((...((((......))))....)))).))))))))))))))))...))))))))))))))).)).))))))).....	-89.9	4.75119	6.15663	1.25922
ptc-miR6529	0.6	agagaauguuaugcuuugaucaug	aacauuggguauaacaugaauuau	Chr04	-	3943071	3943320	agauuacuaaguuauuuuauauagagaauguuaugcuuugaucauguuauauguuaucuuaaucgagguaauaaaggagcaaacauuggguauaacaugaauuauacgaagauacuugagugaucaagagagauuaaucacccuaggugaauuagauaaaauauucaauuuguucgcaaauaguauugaccgaaaaauccuuggucaagguggaaugagauuugaaaaaaguuuaaaaucuuauucaaac	.(((((((((((.(((((.(((((...(((((((((((......((((...(((((((((....)))))))))....))))......)))))))))))...)))))..))))))))).))))))).............((((....((((((.((((..........))))))))))........((((((((.......))))))))))))(((((((((((............)))))))))))....	-60.5	34.6158	27.7048	10.0738
ptc-miR6552e	5.2	cugcucgcaagucggaggccu	gccuccgucuuccgagccggg	Chr05	-	10736731	10736980	acggcggcgguggccgcugccccugcucgcaagucggaggccuggcugacguggcuggugcggacgccgagcuuggggauugcgaggagagcucuacgcuggcgugggcguggcauuaaauugccgugcgcgcgccaugcguuggcucuccuugcaauccccgaccucguggcgugaugugcccgcugccgaggccuggccuccgucuuccgagccggggcugacagccccccgcaugauuguccccguc	...((((.((.(((.((.(((((.(((((.(((.((((((((.((((...(((((.((((((.((((((((.(((((((((((((((((((((..(((((((((((.((((((((......)))))))).))))))).)))).))))))))))))))))))))).)))..)))))..)))))).)))))...)))).)))))))).))).))))).))))).).).)))))))))...............	-171.8	1112.46	1483.75	2445.41
ptc-miR6602	37.5	uguaauucagucgguaacuau	aaauaccaacggauuuacagacgg	Chr01	+	40667474	40667723	uaaguguaacaacccggcuguacgacuugaucaauauuaaaagauuccaacauauucucuuaauuugaggguaaauuuuuuuaaaaaaaaucuaccaaaaauucgguagagucacuaccagaaauucgcuaaauaccaacggauuuacagacggaauauuucugucgguaauuugaggucgaaauuaccgacggacacuuuuccgucuguaauucagucgguaacuaucgacggaccauuuuccguccgu	..((((...(((..((......))..))).((((.(((((.(((...........))).))))))))).((((.(((((((...))))))).)))).....((((((((.....))))).)))...))))...((((.((.((.((((((((((((....((((((((((((((.......)))))))))))))).....)))))))))))).)).)).))))......((((((......))))))...	-77.1	1.35748	2.46265	3.77766
ptc-miR6610	0.4	uuacaaaacacuguagauugcuac	aguuuuccucacagaacauugucaau	Chr06	+	20838469	20838718	agugaaaacguuguuauuuuccuuacaaaacacuguagauugcuacaauauuuuucuaaaugauuuuguuuuuaugauuuuuuucuaaaauuaucuuugucaauuuuauuggggaaagcacuguaguuuuccucacagaacauugucaauugcuacaacauuuuuccucauggguuuuuuuccuuccaaaauuaucuuugucgauuuuuuuuuaauauuaaguugauagagaauuuagcuuuguaauuuu	((.(((((.(((((..........((((....((((.((..((((((...(((((((.(((((..(((.....((((((((.....))))))))......)))..))))).)))))))...))))))..))...))))....))))........)))))..)))))))..((((..........))))......(((((((((((((..(......)..)))))))))))))..................	-44.2	173.758	77.5735	71.7756
ptc-miR6552f	5.2	cugcucgcaagucggaggccu	gccuccgucuuccgagccggg	Chr05	-	10695844	10696093	acggcggcgguggccgcugccccugcucgcaagucggaggccuggcugacguggcuggugcggaccgccgagcuuggggauugcgaggagagcucuacgcuggcgugggcguggcauuaaauugccgugcgcgcgcccaugcguuggcucuccuugcaauccccgaccucguggcgugaugugcccgcugccgaggccuggccuccgucuuccgagccggggcugacagccccccgcaugauuguccccg	...((((.((.(((.((.(((((.(((((.(((.((((((((.((((...(((((.((((((...(((((((.(((((((((((((((((((((..((((.((((((.((((((((......)))))))).))))))...)))).))))))))))))))))))))).)))..))))...)))))).)))))...)))).)))))))).))).))))).))))).).).))))))))).............	-167.8	1112.46	1483.75	2445.41
ptc-miR6550b	8.7	cccacagcuuuauugaac	ucaagaaagcuguggaag	Chr06	-	4863916	4864165	ucuuugauccuguuuguaucuucccacagcuuuauugaaccgcaacaaaaauacaaugucauauguacaugcacggcaacaucaacaacaauauucaaauaggugcaguucaagaaagcuguggaagaauaccaagagggucacauauagaccaccacaaaacuuagauuaaaguauuuuaggagcuucaaagcccuccauaaacaaacccuagcaagguuuguaaagagaagggaagggcagcagggcu	....(((((((.((.(((((((((.((((((((.((((((.(((............(((...((((...(((...))))))).....))).............))).)))))).))))))))))))).)))).)).)))))))...................((((((.........))))))(((((....(((((((....(((((((.......))))))).........)).)))))....)))))	-66.7	0	3.69398	1.25922
ptc-miR6552g	5.2	cugcucgcaagucggaggccu	gccuccgucuuccgagccggg	Chr05	-	10745884	10746133	acggcggcgguggccgcugccccugcucgcaagucggaggccuggcugacguggcuggugcggaccgccgagcuuggggauugcgaggagagcucuacgcuggcgugggcguggcauuaaauugccgugcgcgcgcccaugcguuggcucuccuugcaauccccgaccucguggcgugaugugcccgcugccgaggccuggccuccgucuuccgagccggggcugacagccccccgcaugauuguccccg	...((((.((.(((.((.(((((.(((((.(((.((((((((.((((...(((((.((((((...(((((((.(((((((((((((((((((((..((((.((((((.((((((((......)))))))).))))))...)))).))))))))))))))))))))).)))..))))...)))))).)))))...)))).)))))))).))).))))).))))).).).))))))))).............	-167.8	1112.46	1483.75	2445.41
ptc-miR6539	19.7	auggcuuugaauuacucgauu	ucgagcaauucaaagccauca	Chr16	-	11536563	11536812	guaacaauuaacaaacuaguaauaauuaucuucugauaauuauucuuuuaauaauucuccuucauuuagcaaccuccauugaguaauggguccaucuuauaaugaccacaagagauuuuggauuguuguagcuauuauaggaagaaaagauucucgacuuuuaaaucgagcaauucaaagccaucaacaggaaccaugaucagacugauggcuuugaauuacucgauucaaaagucgagaauagaggauu	.................((.((((((((((....))))))))))))......(((((((...............((((((....))))))....((((((((((.(.((((.((........)).)))).).)))))))))).......(((((((((((((.(((((((.(((((((((((((((....((.......))....))))))))))))))).))))))).))))))))))))).)))))))	-77	8.1449	4.30964	12.5922
ptc-miR6593	487.6	ugaagauauagagaauggacu	uucgcucucuauuuccucaug	Chr06	-	5786872	5787121	uucaguucucuauugucuagcaugaagauauagagaauggacuugcgccuaggaugacuugccgcagauacauuuugguggcaggcaucccuggcuuugcuucgcucucuauuuccucaugcaagauugcuucuaacaugccgugauuuuccacaaacaacaagaggggguagauguucuucugauuuuaguuacugaaguaaguguuuucguuuuuuuuaaucucuagaaccaaauuagaaccauauaa	....(((((.....((((.((((((.((.(((((((.((((.....(((..(((((.((((((((.((......)).)))))))))))))..))).....)))).))))))).)).)))))).))))..(((((........(((......)))........)))))........(((((...((((..((....(((((.......)))))....))..))))...)))))......))))).......	-69.7	272.854	243.187	81.8493
ptc-miR6570	1.6	guuucgaguucgagucagggcgug	gauggcaaagagcuugagaucugc	Chr01	+	25128571	25128820	uuuacuggauacgccagguccaucuugaauugaggaaauggcuucaugacaauguuggugccgaaguugcugcaacaacuagaauuaucuacggagguaaacauuaucuauuuuuucacuuauuaguuauuaugugaacguucgguguugauaguuccuaagagguguggcgugauggcaaagagcuugagaucugcacagcagguuucgaguucgagucagggcgugcgccuauuguaagagccuggaa	.............((((((...((((......))))..((((.(((.........))).)))).(((((......))))).((((((((..((((.((..((((...(((.............))).....))))..)).)))).....)))))))).....(((((((.(((..((((...(((((((((((((((...)))))))))))))))..))))..)))))))))).........))))))..	-77	92.9876	96.0434	71.7756
ptc-miR6530	1218.9	agcauauuaucagagaagagg	ucuucucugauaauacgcuuc	Chr03	-	5265394	5265643	aagcccccggcuuuuuucaauaauaacauggcggcccugaauugaucaucaaggauaggaguugagaucaguuauauggaagggugauguuaggaaucccguaagcuauuuauuaggaauggauaaucuguaggugaauugaagcauauuaucagagaagaggaugggaagccaggagacucuggaauuauuucccuuucaccauccucuucucugauaauacgcuucaauucacugcaauuacuuaugu	(((((...)))))..........((((((.((..((...((((((((.((((.........))))))))))))....))....)).)))))).......((((((((((((.....)))))).((((.(((((.(((((((((((.((((((((((((((((((((((((((((((....)))))...........)))).))))))))))))))))))))).)))))))))))))))))))))))))).	-94.5	240.953	206.247	167.476
ptc-miR6552h	5.2	cugcucgcaagucggaggccu	gccuccgucuuccgagccggg	Chr05	-	10716965	10717214	acggcggcgguggccgcugccccugcucgcaagucggaggccuggcugacguggcuggugcggaccgccgagcuuggggauugcgaggagagcucuacgcuggcgugggcguggcauuaaauugccgugcgcgcgcccaugcguuggcucuccuugcaauccccgaccucguggcgugaugugcccgcugccgaggccuggccuccgucuuccgagccggggcugacagccccccgcaugauuguccccg	...((((.((.(((.((.(((((.(((((.(((.((((((((.((((...(((((.((((((...(((((((.(((((((((((((((((((((..((((.((((((.((((((((......)))))))).))))))...)))).))))))))))))))))))))).)))..))))...)))))).)))))...)))).)))))))).))).))))).))))).).).))))))))).............	-167.8	1112.46	1483.75	2445.41
ptc-miR6538	0.4	augaacuaggacggucugaggcuu	gucucagcuuucauuguuuuuuu	Chr05	-	15638663	15638912	uuaugauuuauaugcuugaaaaaaaaccgaucugaugcucucuaucuuucugcuuuuaugucuucaagucucagcuuucauuguuuuuuuuuuaauuacugugcugccagccaaugaugcaaacccugauuuucacugaaagcagggcuaucgaucugccuaaacuguuguuaauacaugaacuaggacggucugaggcuugaaugguuuuaguuuuuuuuuuuguuuuucaagauuuuguuuucuaucu	..............(((((((((((((((((.(((.((.............))..))).)))((((((((((((((.((...((((.....(((((.((.((...(.(((....(((((....(((((.(((((...)))))))))).)))))..))).)...)).)).))))).....))))...)).)).)))))))))))).)))))...............)))))))))................	-49.1	1500.02	1221.47	400.432
ptc-miR6568b	26.5	guuaaaaccggaccgugaacaccc	uuuuccgguucgguugaauuuuu	Chr07	+	15106507	15106756	cucagauugauauuugacgucaaauuuuuauuugauuuagcucagugaugaagauuagcuuauucaaauaccacagucugguuuuucuaguuuuuaugcuaaaagaccgacccaaacaaaacugguucgguuugaaccgguucucgguucgguccagguaauaucaauaagaaauaauauuuuccgguucgguugaauuuuuggguuaaaaccggaccgugaacaccccuaaguacaagcaucuuggucu	.((..(((((((((....(((((((....)))))))(((((......(((((((((((.......(((.((((.....)))).)))))))))))))))))))..((((((.((......(((((((((.....)))))))))...)).)))))).....)))))))))..)).........(((((((((((((.((((....))))..)))))))))).)))........((..((((...))))..))	-66.2	4.75119	3.07831	5.03688
ptc-miR6572	55.7	guuuuuaguccgauuuagcacguu	gaguuaaguccgauuuuacugauu	Chr14	-	7575307	7575556	ucccuguaaaauuacagauuuauucaauauacgauuugaaagauauguuuaaucuugcaaaacuaguuagcagacauuuuaagaccaaauuugaacuugacuugguucauauucauaaauuuaguaaacuuguaaaaucggaccgaguuuacugauuuuaucgauuuugcacgaguuaaguccgauuuuacugauuucaaguuuuuaguccgauuuagcacguuagauauauauuaacucguaaaaucau	...(((((....)))))............(((((.((((...((((((((((...(((((((...(((....)))............(((.((((((......)))))).))).(((((.((((((((((((...........)))))))))))).)))))...)))))))((.((((((((.((((..(((.......)))....)))).)))))))).)))))))))))).)))).))))).......	-51.7	57.693	12.9289	10.0738
ptc-miR6560	0.5	gaucaagacuguagaaagcu	ccugucagugaucag	scaffold_592	-	12303	12552	uauguuaaaacauauggauguaacccccugcacauccaucaaaacagaaauuaccagcaaccucagcaugguacuucccaaacuccgagcacaaagcuuaggaagaauuauuuccaaacucaggaaauauuacaaggacucauugauacgagucaauuaucagagugcucacagcaucauaauaucugacagccugucagugaucagcgaucaagacuguagaaagcuccaggauuaugaagcucaauuc	..((.........((((((((..........)))))))).......(((..(((((((.......)).))))).)))......(((((((.....)))).))).....(((((((.......))))))).....((.((((((((((....)))))).....)))).))...(((.(((((((.((((..((((((.((((((((...))))...)))))))...))).))))))))))).)))))....	-57.8	429.643	601.502	561.612
ptc-miR6604b	2	uguuuggaggaagagagaauu	gccuuuguucgacccaaacagc	Chr05	-	745810	746059	gguguggucguuguuauggguguuuggaggaagagagaauuggucucuuagagaucaagccuuuguucgacccaaacagcauuuacaugagagauuggguggaguacaguaguaauuguugugagugguauggcaucgagugugauaacacuacaaggcgagugauccaccucucucuuugggaugcaacggauuuccucuugggggauuggguucucaacgcaucuuuguuucugccuuuuaaggaauu	((((((.((((.((....(.(((((((..(((.((((..((((((((...))))))))..)))).)))...))))))).)....))))))((((..(((((((.(((........(((((.((((((.(((.((((...)))).))).)))).)).)))))))).))))))).)))).((((((.....(.((((((((...)))))))).)..))))))))))))...((((((........)))))).	-80.9	9448.76	8464.75	7050.38
ptc-miR6543	0.4	auuugcucacgguuaaggauuaug	uaauauccgaugaaagaaua	Chr03	-	5651157	5651406	agaagaauuuaauauuuugauuugcucacgguuaaggauuaugaccuuacauguaagucguauuucuaauauccgaugaaagaauaaaauuuuuaaaacuucuuuaucacaucaaagccacgaagcaacuuaccucggguagggugcguuagggguguuaauaccuucucuaaccacaaucagucccuuacccgugaaucuuugacaagaccaguacaccuggguuuccuaguaacccucaauuaaauac	(((((..(((((.((((((.(((..((((((.((((((.((((((.(((....))))))))).))))..)).))).)))..)))))))))..))))).)))))..................(((((.........(((((((((.((((((((((.((....))..))))))))........)).)))))))))....((((....))))((((.....)))))))))......................	-52.2	279.641	166.845	156.143
ptc-miR6577	0.3	uauuuggaauuguauuuua	aaauacaaaaacaaauaaa	Chr04	+	3027787	3028036	uguauuauaauaauaauuuuuuuuuaaaauaauuuuuauuuuuuaaaauuuauuuuuaauaccacaauauuaaaauaauuugaaaacauuaaaaaaauuaauuugaaauaaaaaaauauaaauuuuuuuauuuuuuucaaaaauauuuuuaaaauacaaaaacaaauaaaauaaaauaaaauacucaaccuaauaauuucuaguuuuuauauuuggaauuguauuuuaaaaauauaucuaauuuaauaua	.((((((....(((((.((((....(((((((...)))))))..)))).)))))..))))))....((((((((....((((((((...((((((((((.((((.........))))...))))))))))...)))))))).(((((((((((((((((...((((((...(((((............................)))))))))))...)))))))))))))))))......)))))))).	-35.2	9.50238	8.00362	5.03688
ptc-miR6617	0.4	uuccgaucgagauguauggcu	cgaucauuccgauucuuucu	Chr13	-	14798436	14798685	gacuuucucuuuuuuuuuuggauggaauauuuacggaauccccauaaauaggaucaaaccuuauccaugguauuuaccucuucuuauucuuagcaagucuccgagagggcuuauugauccaugauuuauguuucaucuuucguuccuuuucguuuguuucgagaaauauagcgaucauuccgauucuuucuuuuucuauugauucuuuuccgaucgagauguauggcucaugagucuaugugucuauaua	..(((((((.......((((...((((((.....((((...((((..(((((.......)))))..))))...)).))......))))))...)))).....)))))))..(((.(((.(((((((((((................((((((.......))))))....(((.((((((.(((((.........((....)).........))))).)))).)).))))))))))).))).))).)))..	-45.7	1.35748	14.1602	18.8883
ptc-miR6591b	3.2	ugaaaugccaugaacaacgauc	ucguguucauggcacuucaug	Chr13	-	12236813	12237062	auucauccagucuauggaucguguucauggccgugaacaacgagcucuucaugggcaugauucuuuucuuuauucucugccaccauauauuuggauguuuagcuucaaauauuaguauaugaacacgagggugguuggaaucgcuacaaauggaucguguucauggcacuucaugucuucuguggcaauucaaguuacaggguagaugaaaugccaugaacaacgaucucuuuauggggaugauuucuua	..((((((.(((((((((((((((((((....)))))).))))....))))))))).(((((((.....((((((((((....((((((((..(((((((......)))))))))))))))..)).))))))))..)))))))(((.(((.(((((((((((((((((.(((((.(.(((((((((.......))))))))).).))))).)))))))))).))))))).))).))))))))).......	-90	6.78741	6.77229	10.0738
ptc-miR6587a	5.1	ucuguuucgcugccgcaacugaac	uguguugcgcagcgaaauucugu	scaffold_1136	+	13024	13273	agcgaaauucuguuucgcugccgcaacugaaccugcugcagcgaauucauauucgcugccgauuuguguguugcgcagcgaaauucuguuucgcugccgcaacugaaccugcugcagcgaauugauauucgcugccgauuuguguguugcgcagcgaaauucuguuucgcugccgcaacugaaccugcugcagcgaauugauauucgcuaccgauuuguguguugcgcagcgaaauucuguuucgcugcc	((((((((...((((((((((.(((((...((...(.(.((((((((((.(((((((((.(....((..(((((((((((((((...((((((((((.(((((...((...(.(((((((((....))))))))).)....))..)))))))))))))))...))))))))).))))))...))...).)))))))))))).))))))).).)....))..)))))))))))))))...))))))))...	-122.4	93.6663	57.8723	62.961
ptc-miR6565c	0.5	gguuugauauaaaguagg	uauuuuuucugccac	scaffold_592	-	4129	4378	acaggauaucauaccuagacgugguuugauauaaaguagguauaguaaaaaucuuaucuuggauaagaauaucuauuuuuucugccacgaugucuaauucgugaauaguaucauccgcuaauuuagcguaaauagguacuuugguuuuuacccaaaaauucgguggaaugauauauuuauuggcuagacacaugcuagcaccagugucaacauaacagucaacauuauacuuucgguauccacuaaagga	...(((((((.....((((((((((..((...(((((((((((........(((((((...)))))))))))))))))).)).)))))...)))))....(((((((.((((((((((((((((...(((((..............)))))....))))).))))).)))))))))))))..(((((.(....))))))...(((((..((......))..)))))........))))))).........	-58	1.35748	3.07831	1.25922
ptc-miR6590b	35143.1	ucuucucugauaauaugcuuc	agcauauuaucagagaagagg	Chr03	-	4847112	4847361	agccuccaaagucuuguucuucuggauuugaauucucucgacaaacugauauuuaucuucacaccgucccucacucaaagucugccaaagcuggaaacccuugacauaaguaauugcagugaauugaagcauauuaucagagaagaggauggggagagggaaauaauuccagagucuccuggcuucccauccucuucucugauaauaugcuucaaagcuggaauuauuucccuuucaccauccucuucuc	....(((((((.......))).))))(((((........(((....(((.........)))....)))......)))))........(((..(((............((((((((.((((...(((((((((((((((((((((((((((((((((.((((...............))))..))))))))))))))))))))))))))))))))).)))).))))))))...........))).)))...	-81.9	11336.3	8284.36	6682.68
ptc-miR6597	36.6	uggauucaucuacuuacauuu	uuguaaguagaugaauuc	Chr04	+	23210534	23210783	aauucuugaguguggcuuuugcauagagugaagagacuugauagagaacugguguuguagaaaccauccuuaugagugguauuuggauagagugaagagaguggcagugagacuugaugggaaauaacuaucuguuuuguaaguagaugaauucauacauaaaugguauugaaguucuuucccaucaaaccuuaacgccagugcaguguggauucaucuacuuacauuucaaauaguucuuuccuaucaa	...((((.(.(((.((((((.....((((......))))........(((..((((.((((.(((((.(....).))))).)))))))).)))...)))))).))).))))).(((((((((((.((((((.((...(((((((((((((((((((((.....((((.((((.(((...........))).)))).)))).....)))))))))))))))))))))...)).)))))).)))))))))))	-77.8	11.5386	20.3169	23.9252
ptc-miR6613b	0.4	uuagaucuugguuucucugaaauc	uuugagagaugagagacaagaaaa	Chr01	-	9394424	9394673	uguucuccuuguccagaaguuaaacccagcaaaaaaauauacaaaacaaaaggauuugacugcaaaaaaacaaaaagaaaaucaaaaguuauugaaauguaaaaucaucaaaaagcauggaggagaagaauacagauuugagagaugagagacaagaaaagcaucgauagcauugauacagacacuguugagagugcagaguuuuuagaucuugguuucucugaaaucccaagaaaacccuuucauggua	((((((.(((.((((..(((((((.((........................)).)))))))....................((((......)))).(((......))).........)))).))).))))))..(((((.(((((...((((....((((((.((....(((((...((((...))))....))))).))))))))...))))....))))).)))))(((.((((....)))).)))..	-47.9	6.78741	3.69398	3.77766
ptc-miR6542	102.8	auuuacaugaucguuaacuucaga	auuaguugagauacauaua	Chr02	+	11473943	11474192	acaaauuucauggccauuagagauuuacaugaucguuaacuucagagcucauaaaauuaguugagauacauauaaacuagcccggacauuuauuaaaaaaaaaacagcaugagucuucaaaugagaacuaaacucagcuaacuuuuuccagauucaaagguggcgagcaguauuuugcacaugaaaaaaucaaucauuagccaucauguggaagacauaucucaguuauucaaagaauaccuucauuuac	..((((.((..(((...(((...((((.((((((.((((((.................))))))))).))).))))))))))..)).))))......(((((...(((.(((((.(((......)))....))))))))...)))))....((((...(((((((((..((.((((.(((((((...................))))))).)))).))..))).))))))....))))............	-36.4	338.013	237.03	188.883
ptc-miR6534b	0.7	aguuguuggaaauugucuuaucuu	uugcaggacagauuuugacuucuc	Chr07	-	7025791	7026040	uugagcaggugcucaucauaaaaguuguuggaaauugucuuaucuuuccacccaccaaaugugaugucauuuugccuucuagaacuccagcuauggguaaacuuuuaagcaguguuugggcuggauugcaggacagauuuugacuucucuuuuguggucaagcuuugaauuugcaaacgacagauuugggucuuccacucuucaugaaaguuguagaccuaugucuuaacuuucuagaacaauaaaccaa	..((((....))))((((((((((..(((((((.(((((((..(..((((((((.....(((........(((((((..(((........))).))))))).......))).....)))).))))..).))))))).)))))))....)))))))))).(((.(((((((((((....).)))))))))).)))......(((..((((((((.((((....))))))))))))..)))...........	-63.5	35.9733	21.5482	31.4805
ptc-miR6553	1.8	cuuccaguaggucucagucuc	gaggaacugcuggaaauc	Chr17	-	13392483	13392732	uagagaauagauggagaggugauaaaaggaaagaaggaggcuuagcuugauugaccuccaugaaaagcuaagagguggcaucugauaacaaaguggagaaagaagggaaagggaggaacugcuggaaaucauuggcaugagagguauugguaagaaaucaucauaaggaaaagauccauuuucuugccaaacaccucaugcccacaacuuccaguaggucucagucucccccuccggcucuucucaaguu	..(((((.((.(((((.(((.(...(((..(((.......)))..)))...).)))(((((.........(((.......))).........))))).......((((....((((..(((((((((......((((((((..((.(((((((((((.........(((.....)))..)))))))))))))..))))))))......))))))))).))))....)))).))))).)).))))).....	-79.2	4.07245	6.77229	6.2961
ptc-miR6636	0.5	uuuguaauucagucgguaacu	uuaccgacugaauuacgaaua	Chr19	-	2021991	2022240	cucaacaauucugaacuuuucauuuguaauucagucgguaacuauugacggaaguaguucaucaguaauuaccgacugaauuacgaauaaaaaaauauccguugguaaguuugaccucaaauuacugacagaaauauuccgucuguaaauccguuguuauuaaacaaauuucugguagugacugaucuaguagcgguugaauauaacuaaaccuuuuaaaaaauuaaaaaaaucaaacacaaaaaaaaua	.....((((.......((((.((((((((((((((((((((.((((((..(((....))).)))))).)))))))))))))))))))).)))).......))))....((((((.......((((.(((.(((...))).))).)))).....(((((....)))))....(((.(((........))).))).((((...........))))((((((....))))))...))))))............	-57.4	12.2173	9.8506	13.8514
ptc-miR6616	0.4	uucauugucugcuguaauggc	caaagaagaaagacauggaaaa	Chr06	+	27309679	27309928	agaagagacuggugaugucaucuucauugucugcuguaauggcauugaacuaguguugaucaaauuaagaucuucaucgagaguuggaaacaacggcauugaagucagauuuggacacacaacaaugcucaaagaagaaagacauggaaaaaagagcauuaucaacccuucuucuauuguugacucaucucuaucaucauucaucucaucucuacuccaucucuuccaccaucccuucagucuacgacaa	.(((((((.((((((((.....(((..(((((.((....((((((((.....(((((...((((((..((.(((((......((((....)))).....))))))).)))))))))))....)))))).))....))..)))))..)))...((((.....(((((............))))).....))))..))))).................)))))))))).............(((...)))..	-52	6.10867	7.38795	17.6291
ptc-miR6627	0.4	uuuccggucaauagaaaauacuuu	aaacuauuuucuaaacuuuucugu	Chr18	+	12047318	12047567	gaaaauucuaagaauuggaguuuucuaccgucaaacuuaaauuauauuagauuagguguguuuauuuaaaaaauaugucgcgcaccucacaaacaaacacuuuuuaagauuguguuuguuuuucaaaaauuaauuuucggaaaacuauuuucuaaacuuuucuguguuuauuugucauuacaaaaauuggucaacgaaaaacauuuuccggucaauagaaaauacuuuucagucaaaggaaaauuugguu	(((((((((((...))))))))))).((((.......................((((((((.(((.........)))..))))))))...((((((((((...........))))))))))..........(((((((.(((((.(((((((((.(((.....((((((.(((((.....(((...)))....))))))))))).....)))...))))))))).)))))........))))))))))).	-48	45.4757	19.7012	21.4068
ptc-miR6589b	1824.5	ucuucucugauaauaugcu	caauuauuuauguagaggccu	scaffold_68	-	42720	42969	aauuauuucccuuucaccagccucuucucugauaauaugcugcaauucagcgcaauuauuuauguagaggccugcuagcuuuggcagacuuugagcgagggacggugugaagauaaauggcaguuugucgagagaauccaaacucagaauauuaagacuuuggaggcugacaugucuggugggccccuuccaaaugcauuugagcucagguaacccugacagcuguaacaauguuaaggaugacagcagc	.......(((((((((...((((((.(...((((((.(((.((......)))))))))))...).))))))((((((....))))))....)))..)))))).(.(((.(.(((((((....))))))).......((((((.((..........)).))))))((((.((.......)).))))...(((....(((((..((((((((....)))))..))).....)))))...)))).))).)...	-66.6	391.634	344.771	266.955
ptc-miR6600	1.5	ugguguuguuggauuugucuuguc	cgagucgaauccaacaccauuauc	Chr05	+	23306539	23306788	gguaaaaaaaauaaaaagagucuagagauacaccaaaacucugaugacgauaucaucguacccuugaaaagaucucgacgagucgaauccaacaccauuaucaaccgugaucgaagugggcaacaugagccgccugaagguaaaugagccuugacacauuuggacggaucgugugacucauuucgauaacuguuuuguguccuuucuugguguuguuggauuugucuugucaauaucuuuuuaaugauac	................(((((...(........)...)))))(((((.....)))))(((.(.((((((((((...((((((.(((((((((((.(((((..(((.((.(((((((((((..((((((.((((((.(((((......))))).).......)).))).))))))..))))))))))).)).))).............))))).))))))))))).))))))...)))))))))).).)))	-76.3	1031.01	870.547	696.349
ptc-miR6579	0.6	ucauuccacacaucaucuagg	uaguucuaaaaugucagcggaugagg	Chr18	+	247131	247380	cucucucuacuguuuuuuucaaaauaugcaaacugacugaauaaugaccaacauucaucuguagagagaaguccuaguucuaaaaugucagcggaugaggagcccaugcaauuugcaacuuuccucuuacguguggucaccaaaauucuacuuccaggcaaacaaccacacuuaagggaguuuuucaguugcucccacuuugaggaauccucauuccacacaucaucuaggacaagcaagaauuucuuuc	.(((((((((((((((....))))))........((.(((((..........))))))).))))))))).(((((((.......((((..(.(((((((((.((((........((((((((((.((((.(((((((...........................))))))).))))))))......))))))........)).))..))))))))))..))))...))))))).................	-61.7	332.583	389.099	292.139
ptc-miR6615	4.8	uuaucgagaucuuuuuuacagu	cauaaaaaaaauauugaugaga	Chr01	+	38025527	38025776	aucaaaacuuugaugauaacauuauugguaucauaaaaaaaauauugaugagauaaauccaaugacacuagaaagaucaucaauggugaucagagugggcacacgagccaccuuaaaggaagugauccauucgccaucuuuagacgacuuguguggccgacuccgaucaccgcuggugauauuuuuuuauugucauuagauucaucuuaucgagaucuuuuuuacaguaccaguagugucaucauuaaag	.......((((((((((.(((((((((((((..(((((((.((.((((((((((.((((.(((((((.((((((((((((((.((((((((.((((.((((((((((.(..((.(((((..((((.....))))..)))))))..).))))))).))).)))).)))))))).))))))..)))))))).))))))).)))).)))))))))).)).)))))))..))))))))))))).))))))))))	-108.7	28.5071	14.7759	2.51844
ptc-miR6626	2	uuuauaacuuuaacccucaac	ugaggguuaaaguuauaaaca	Chr03	-	2573775	2574024	agaguaguucucucuaaccauuaaccagcaacgaaugauaucaaagaugucuuuugcagcuuacaauggaaacagaauaguuuguaauuuagagaagcuuuugugguuaagcuucaauugaggguuaaaguuauaaacauuaaucgauaaccuacacaugcaaaauuugagaagcuuuuuuuugauauuuaugcuuaucgauuaauguuuauaacuuuaacccucaacucgaauuuugcuauucauuuaa	((((.....))))....(((((....(((..((((.((((((...)))))).))))..)))...))))).....(((((((....(((((((.(((((((........)))))))..(((((((((((((((((((((((((((((((((.........(((((((.(.(((((....))))).).)))).)))))))))))))))))))))))))))))))))))))).)))))..)))))))......	-80.9	3.39371	4.9253	1.25922
ptc-miR6631	4.6	uuugacuuugacggguuaguuggc	aaccugucaaagucaaaucu	Chr06	-	12955125	12955374	ccuguacgcacgugauaaauggcuuguaaguugcaauuacauuucucuuugcaaauuuauagcuuguucuuugauaaauguuuauaccuagagagauaaaucaaacaggcauagccgacuaaccugucaaagucaaaucuauaaguuucagaacccuggaggcacaugaaugccacaggaaucuaagaaaaccaucauauuagauuugacuuugacggguuaguuggcuaugccuguuugguuuuucucu	..((((.(((.((.(.....((((.(((((((((((............)))).))))))))))).......).))...))).)))).....(((((.((((((((((((((((((((((((((((((((((((((((((((....(((((((..((((..((((......)))).))))..)))..))))..........)))))))))))))))))))))))))))))))))))))))))))).)))))	-105.6	18.326	22.7795	15.1106
ptc-miR6540b	1	augguuuguacaagggagucuguu	uauguucccuuugcauuuuguuc	scaffold_45	-	267996	268245	auucagcaagcuugucuugcuuaugguuuguacaagggagucuguucccuuaguuucucuucaguaagcuggucuagcuuaugguuuguacaagggaguauguucccuuugcauuuuguucagcaagcuugucuugcuuuggauuuggucaagggacuuuguucccuuuuccuuguauugcuggucuccagcuucuuuuuuaucuauacaauucuuacauuugauaaaaaaaaaaaaagaaagagcuggu	(((((((((((..(.((((((.((((..((((.(((((((..(((((((((.((......(((.(((((((...)))))))))).....)))))))))))..)))))))))))..))))..)))))))..).)))))..)))))..((..((((((......))))))..))...............((((((.(((((((...........((........))............))))))))))))).	-69.1	25.7922	12.9289	17.6291
ptc-miR6520	30.9	aacugauggaguguuaauagc	uuauuagcucuccaucaagugu	Chr12	-	2030603	2030852	uguugcaacauggaaaagggcauaacugacugaagaauguuagaaugcuaauucuguuaucaucuguucauaagauauuguaaaagaaacaguaggaauauugcucuugcuuugcauugaaauaaauuuuuggguggaguuauuagcucuccaucaaguguuaauggcacaguacuuuucucucuuuaaaggugaagggccguuaacaacugauggaguguuaauagccccagccuaaagauuuucuguu	...(((((...((..(((((((...(((((........)))))..((((..((((.((((.((((.......))))...)))).))))..)))).......))))))).))))))).......((((((((((((((.(((((((((.((((((((..((((((((((....(((((((........)))))))....))))))))))..)))))))).))))))))).))).)))))))))))......	-81.4	4.07245	12.9289	10.0738
ptc-miR6599b	0.9	uggguuuguguuucuaaugau	cuuggaaagacuacuaua	Chr14	+	654387	654636	gagacagauuccuugcuugaaagcucagaaguuguaguaggaagggaggaugaugucucuaaaguuaugaaauugcugauuggcucgaucggucaacaaguucugucuguugucccuauuguggggauggcaggucuuggaaagacuacuauagcaaaaaaaguuugugaaguggugacggagaaaaagcuuuuugauguaauaauauggguuuguguuucuaaugauuuuaguaaacggaggauuuuag	((((((...(((((.(((....(((((.....)).)))...))).)))))...))))))........(((((((((((((((...)))))))).......((((((((((((((((((...))))))))))))((((((((((.((..((((((((.(((((((((......((....))......)))))))))..))).....)))))....)).))))))).)))........))))))))))))).	-67.3	293.895	350.928	386.581
ptc-miR6545	2.8	auuuuaagcuaauaugugacgugu	acaucaccuguuggcuuaaaaugu	Chr02	-	22837664	22837913	uccuuugagauugacuuaacgauguuuguugacuaauguaaagccaauuauuugaugacacaucaccuguuggcuuaaaauguaauuuccagcggagaauaaugggaaaaaaauaaaaaaaaggugaaaaaucaauauaauuaaugagaccugauauuauauugauuuuucagauuuuuuuccuuacucuuggauggaaauuucauuuuaagcuaauaugugacgugucaucaaaauuaguugugcggua	.......(.((((..(((((((...))))))).)))).)...(((((((((((((((((((.((((.(((((((((((((((.((((((((.(.((((.....(((((((((((..........(((((((((((((((((....(....)....))))))))))))))))).)))))))))))...)))).).)))))))).))))))))))))))).)))).)))))))))))..)))))).))....	-86.8	65.8379	19.7012	28.9621
ptc-miR6574	1.6	uagugugguagauaugugagg	ucacaugccaaacauacuaac	Chr19	+	9891601	9891850	ucuaaguuaauggccauuauccuagugugguagauaugugaggacuugucuccacuuccuaaaaaucgcauuugucuccaaauaagagauuguuagguaguggagauaaaaauccucacaugccaaacauacuaacguaauaggcaucgaaagagaaggagugagcuaaugcuugcuacucucuauaaauaaaaagaaagaagaggcaacauguagaagcaagaagagaacuuuucucacacucauuguu	.......(((((((((((((..(((((((...(.((((((((((.(((((((((((.(((((.((((..(((((....)))))....)))).))))).)))))))))))...)))))))))).)...)))))))..))))).)))......(((((.(.(((((((....))))))).))))))..............(((((((......(((....))).........)))))))......)))))..	-77.3	712.679	423.576	268.214
ptc-miR6594	0.6	ugcaggugaugauaaaauagaca	aaugggaaucucucugaugcau	Chr18	-	14695034	14695283	uuuuaauugucuauggauaaaaugcaggugaugauaaaauagacagggacaucagcuacuccuuuuuuagggaggaugaugacuaagucuaaaaugggaaucucucugaugcauuuuucauagauuaaaaacugugaauuuaguguuguuuuuuucuguauauauaauugaauugguuuuugugcaaaugaugauaaaauagacagggacaucagcuacuccuuuuuuagggaggaugaugacuaagucu	........(((((((((..(((((((((.(((.......(((((..((.(((((....((((((....))))))..))))).))..)))))........))).))....))))))))))))))))((((((((...((((((((..(((............)))..))))))))))))))))..................((((..((.(((((....((((((....))))))..))))).))..))))	-60.7	31.9008	6.77229	10.0738
ptc-miR6576	0.4	uauuauaaccaagacuaaugc	auuauucuugguuauaauauu	Chr02	+	13939344	13939593	cugguuucucacuuaccuucuauauuauaaccaagacuaaugcauuagucuuuuauucuguuguauugauucauaaaugcuacaauaauucuuuauuucugcauaaauuaaacagguuauguauuauucuugguuauaauauugaauuuauuugagauaauuucagcucgaucauauguuaugucaugccuuaaucggauaaaacaaagaaaaaaaaaggucucaucggcuuccuucauagcuuucagcu	......(((((..((..(((.(((((((((((((((.((((((((...........((((((..(((.........((((...(((((....)))))...)))).)))..))))))..)))))))).))))))))))))))).)))..))..))))).......((((.((......((((((....(((...((.((((...................)))).)).)))......))))))..))))))	-50.9	10.8599	4.30964	7.55532
ptc-miR6598	1.4	uggggagggugggaggcu	acuucuauuuugcuguac	Chr02	+	20857745	20857994	cauuuuguuaugguccuguggggaguccacauauggguuucauguguauguaauuuguuuugauggccaccugaacugauugcuucuuaacugaauuauugaauucgguauuugaaauucaguagaaaucaauugcaugaaauuaaacuucuauuuugcuguacugcucuuugaagagcuugagguggacucuccaaagagccuggaaaauggggagggugggaggcuaauagccccacaggaggcaugu	........((((.((((((((((.....(((((((.....)))))))..((((((.((((.(........).)))).))))))((((..((((((((.((((((.....)))))))))))))))))).(((......))).((((..((((((((((.((...((((((((((.((((((......)).)))).))))))))..))......)).))))))))))..))))..))))))))))..)))).	-74.9	1.35748	8.61928	1.25922
ptc-miR6557	1	gacagaaagagaaaugagc	ucacucucuucugucaa	Chr18	+	1583345	1583594	aucagauuccggcucuggaagugacagaaagagaaaugagcacgcaaaagcaaugguauaauuuuauacaaauaugccucugugugcucacucucuucugucaauuucuaaugucccagaagcuggaaaaaacgggaaagaaaacaagcaagcaaaaccuuuucuguucuaguuuugagcucugaguggaagauaaaacauacccaaaaauggaaaggaaagagagagcauaaaauguacaaaagaauga	......((((((((((((...((((((((.((((..((((((((((...(((...(((((....))))).....)))...)))))))))).))))))))))))............)))).))))))))..((((((((((..................))))))))))...((((((.(((((...(((..............)))..................))))).))))))..............	-69.7	23.756	40.6337	44.0727
ptc-miR6548	4.5	ccacuaguauuguuagaaagaucu	aucuuucuaaugguaccgggggua	Chr12	+	5050350	5050599	guuggauucaucuuguugaaaucuuucuaaugguaccggggguaucaucaucgaagcuucgguguauuuuuagucucuuuauuuuuuuuuuacuuuuuucucuuuccuauucuuucauaauuauaagguggagagaggagaaagaaauaacaaaaaaaaaaaaacaaaugauccuagagguacauuaaagcucugaugauuauaccacuaguauuguuagaaagaucuuaacaagaugaauucaaugaca	(((((((((((((((((((.((((((((((((((((.((.(((((.(((((((.(((((.(((((((((((((..(((((.((((((((((.(((((((((((((((...((((..........)))).)))))))))))))))..........)))))))))).))).))..))))))))))))).))))).))))))).))))).)).)))))))))))))))).)))))))))))))))))))....	-103	4.07245	11.6976	21.4068
ptc-miR6524	0.4	aauccgaucaucagauugagcuga	agaaauuugaugaaaaaucacaauuuga	Chr09	+	7621804	7622053	auuuuaucaauaauuuuuuauuaguuuuauguuaaaaaaauuuuguaauucuugauugaguuaccaaaauuuuuuugaaaauuuaugugaaguuuucuaauaugaugcuuuaacuugaguuaaaauuucagauuuuuugagaaauucagaaauuugaugaaaaaucacaauuugauuaguuuuacguuauuggacguaauuuucaauccgaucaucagauugagcugaaauuuuaugagggaucuuaaaa	..........((((((......(((.(((((((((((((((((((((((((......)))))).))))))))))).((((((((.....)))))))))))))))).))).......))))))...(((.(((((((((.((((.(((((.((((((((((....((.....((((......(((((((....)))))))...))))...))))))))))))...))))).))))..))))))))).))).	-50.6	29.1859	19.7012	11.333
ptc-miR6546	0.4	caaaccacucuugaacucugc	ugaccaagggugguuuucccgac	Chr01	+	39574981	39575230	acacagacccauguuuugagaucaaaccacucuugaacucugcuauuauuguaaacaagcugaccaagggugguuuucccgacuccacacauaccuacaauaggaaucacaccaaggcuucugccauaugcaucaucugauaauagcaacuucacuauagcuuucuuaucauuguuccuaccgaaaacaccagauucaucaaccaaagaaguuguuggcguuuuauguaaugaugguuuuucuccaauau	....((((..((((...(((.((((((((((((((...((.(((.............))).)).))))))))))))....)))))...)))).((((...))))...........(((....))).....((((((.((((((.(((............)))...)))))).......(((..(((((.((((...(.((.......)).)...)))).)))))..)))))))))))))...........	-47.5	25.1134	21.5482	22.666
ptc-miR6635b	2.4	uuugguaacugaggaaacgug	cguuuccucaguuaccaaaca	Chr01	+	5754916	5755165	agccucagaucuuaaggucaguugcuagcuacaucguaaaaaaugaagaaauuauuagaaauauuugauuggcacaguuauugaaauaauugguguaccaaagcaggggggaaucaaagucaucaucguacucaauugagaaaauugaguguuucacugugugguuacuucacguuuccucaguuaccaaacacuuguuuacaaguguuugguaacugaggaaacgugauuuauuucaugagggacccac	..(((((((((....))))........((((.((((.......(((........)))........)))))))).(((((((....)))))))(((.((((..((((..((((................(((((((((.....))))))))))))).)))).))))))).((((((((((((((((((((((((((((....)))))))))))))))))))))))))))).........))))).......	-83.4	57.693	65.8759	41.5543
ptc-miR6587b	1194.7	ucuguuucgcugccgcaacugaac	uguguugcgcagcgaaauucuguu	Chr04	-	14026493	14026742	ugcagcgaauuaauauucgcugccgauuuguguguugcgcagugaaauucuguuucgcugccgcaacugaaccugcugcagcgauuugauauucgcugccgauuuguguguugcgcagcgaaauucuguuucgcugacgcaacugaaccugcugcagcgaauuaauauucgcugccgauuuguguguugcgcagcgaaauucuguuucgcugacgcagcugaaccuccugcagcgaagugauauucgcug	..((((((((.....((((((((.((...((..(((((((((((((((...((((((((((.(((((...((...(.(((((((......(((((((((.(....((..(((((((((((((((...))))))))).))))))...))...).)))))))))......))))))).)....))..)))))))))))))))...))))))))).))))))...)).))..)))))))).....))))))))	-121.3	93.6663	57.8723	62.961
ptc-miR6607	1.7	uuaacgacuauauaaaucucuaau	uacauggcuguuaacuucagg	Chr17	+	13358765	13359014	auuuuuuacuugauuuauagagaaauauacauggcuguuaacuucaggcuuguagaauuaguugaggugugcacaaacuggcugagacaccuacauuaauaaaaaaauauuuaggaauucaaaauaauauuuuugaauuuuuuuauuaacguggauauccggaucagcuuacgugcaccucgacuaauuucaugagcccuaaaguuaacgacuauauaaaucucuaauaguccugagauuuauaagacuc	........(((((((..((((((..((((..(((.(((((((((..(((((((.((((((((((((((((((.....(((((((.((...((((.(((((((((..........((((((((((......))))))))))))))))))).))))...))))).)))).....)))))))))))))))))).)))))))...))))))))).)))))))..))))))..))))..))).............	-78.2	24.4347	19.0855	17.6291
ptc-miR6565d	0.8	gguuugauauaaaguagg	uaacaggauaucauaccua	scaffold_592	+	8893	9142	aacaauauuuucgggaggcggagcuuuggugugacuaccauaagcuuuagacucgaggaaaccagguuuaccuugaugguaagccgaggugacuuugggacaaacaacaauuuguccaucauugugaaagacaacaauuuuaccccacugaccaaaaggcucauaaaggcgacaaaaauuguuuccuaacaggauaucauaccuagacgugguuugauauaaaguagguauaguaaaaaucuuaucuugg	((((((.((((((.(((..((((((((((((....))))).)))))))...)))((((..(((.((((((((.....))))))))..)))..)))).(((((((......)))))))...(((((........)))))....((....(((((....)).)))....))))).))).)))))).((((.....((((((.(((.......))).))))))....))))......................	-66.9	1.35748	3.07831	1.25922
ptc-miR6564	287.8	ggucucgaguucgagucaggacgu	gugauggcaaagaacuugagaucu	Chr19	+	3514166	3514415	uugaaaaguagaaauaauaauuaauuaauaaaaaaccuaaaucauguugcaaaaauuauauuuauucacacucguauauaacuguggauuguaacaguuuuucuagcuuauauaauauaccuuuucuuuugauuuaugcauuauuguuaauuuguccucaagagacguggcgugauggcaaagaacuugagaucugcauagcaggucucgaguucgagucaggacguauacuucuuauaagagucuggga	............................................((((((((...(((((.((((..((....))..)))).))))).))))))))....(((((((((.(((((....((...((((((((...(((.((((....)))).)))..))))))))...))(((..((((...(((((((((((((((...)))))))))))))))..))))..)))........))))).))).))))))	-57.2	181.903	155.147	129.7
ptc-miR6523	149.1	aaucaagaaauagaacacaag	uuguguuuuaauuauuucuug	Chr19	+	7672225	7672474	ucuuguugggaguagcaucuguaaucaagaaauagaacacaagauuaacaucuaaccacauacguauguaugugguuuguguccaucuuguguuuuaauuauuucuugauuacaaauggugcugaaaucaaauccauguuaaucuuguuugaguauauauauuauagggagguggugguccugaugaugauguugaugaucauaaggaagauaucaaguggccaccauggcugcauccacuucuugaaac	.....((((...(((((((((((((((((((((((((((((((((..((((..((((((((((....)))))))))).))))..)))))))))))....)))))))))))))))...)))))))...))))....((((...((......))....))))......(((((((((...((((.(((((.((....)).))))).)))).........(((((((...)))))))..))))))))).....	-89	59.7293	78.8048	81.8493
ptc-miR6549	0.4	ccauggcgaugcuggagaugu	acuccaaaauugcaacuuga	scaffold_1634	+	7175	7424	ugggagagagcuaaaaggucauccauggcgaugcuggagauguuucaugagaaauaugaaccgcagauugaugacaucugugaauuacgacucuuuacguuacauuuuuuaauuauuuuuucaccuguaauauuuuacaagauauuuguuuuuucaaugugcuagucuaucgaaagucgaaacacuccaaaauugcaacuugaucaacugacaaccucauuuaugguugauguccuuucugucuaacauu	((..(((.((...(((((.(((.....(((((..(((((.((((((((.....(((.((...(((.(((((.((((((((((((.((..((...................................))..)).))))).)))....))))...))))).)))...))))).....)).)))))))))))..)))))...............(((((........)))))))).))))))).)))..))..	-52.74	4.07245	6.77229	10.0738
ptc-miR6552i	5.2	cugcucgcaagucggaggccu	gccuccgucuuccgugacgccccu	scaffold_346	+	77592	77841	acggcggcgguggccgcugccccugcucgcaagucggaggccuggcugacguggcuggugcggaccgccgagcuuggggauugcgaggagagcucuacgcuggcgugggcguggcauuaaauugccgugcgcgcgcccaugcguuggcucuccuugcaauccccgaccucguggcgugaugugcccgcugccgaggccuggccuccgucuuccgugacgccccugcugccgaggccuggccuccgucuuc	((((.(((.(.((((((.((....(((((((((.((((((((.((((...(((((.((((((...(((((((.(((((((((((((((((((((..((((.((((((.((((((((......)))))))).))))))...)))).))))))))))))))))))))).)))..))))...)))))).)))))...)))).)))))))).)))..)))).))....)).))...))))).))).))))....	-157.4	1112.46	1483.75	2445.41
ptc-miR6518	282.2	aaauacuguggauugcugcgaugu	auuguugauugcuacaguguuucu	Chr01	-	25041870	25042119	auuuuuacuuuguaauuuuuuuuuaaauacuguggauugcugcgauguuuuuccauuuaguuuuucuauuuuauuucuuuauuuuucaaaauuauauuuuuugauuuuuuuuuaauguugagcugauugagaauuugguuuuguaauuuuuuuuuaaaacauuguugauugcuacaguguuucuccacaugguuuuuuucccuccaaaauuaucuuuauuuuauuuuauuuuuuaauauugagcugguua	........................(((((((((((....(.((((((((((.......((((.....(((....(((((.(((.(((((.((((..................)))).)))))..))).)))))...))).....)))).......)))))))))).)....)))))))))))..((....))...........(((......((..((((..(........)..))))..))..)))...	-31.6	352.946	162.535	142.292
ptc-miR6583	9.2	ucgaguaauucaaagccauca	uggcuuugaauugcucgauuu	Chr16	+	11536565	11536814	uccucuauucucgacuuuugaaucgaguaauucaaagccaucagucugaucaugguuccuguugauggcuuugaauugcucgauuuaaaagucgagaaucuuuucuuccuauaauagcuacaacaauccaaaaucucuuguggucauuauaagauggacccauuacucaauggagguugcuaaaugaaggagaauuauuaaaagaauaauuaucagaagauaauuauuacuaguuuguuaauuguuacuu	.(((((((((((((((((((((((((((((((((((((((((((...((.......))...)))))))))))))))))))))))))))))))))))).....(((.((.((((((.(((((((..............))))))).)))))).)).)))...........)))))))..........(((((.(((((.((((((((((((((((....)))))))))).))..)))).))))).)).)))	-87.5	2.03622	4.30964	3.77766
